# Supplementary material
Source: PubMed Central journal article supplement (PMC6937554)
Supplement: supp_RA119.011506_156511_1_supp_432261_q19yxg.pdf [file supp_RA119.011506_156511_1_supp_432261_q19yxg.pdf]

## **Supplementary Information**

### **High-resolution genome-wide expression analysis of single myofibers using SMART-Seq**

Darren M. Blackburn, Felicia Lazure, Aldo H. Corchado, Theodore J. Perkins, Hamed S. Najafabadi, Vahab D. Soleimani

Corresponding author:

Vahab D. Soleimani

Department of Human Genetics,

McGill University

3640 rue University

Montreal, QC, H3A 0C7, Canada

[Vahab.soleimani@mcgill.ca](mailto:Vahab.soleimani@mcgill.ca)

Telephone number: +1 514 340 8222 ext. 26136

Fax number: +1 514 340-7502

## Inventory of Supplemental Information

### Supplemental Tables

Table S1A List of genes expressed in the whole muscle but not in the myofiber

Table S1B GO term analysis of genes expressed in the whole muscle but not in the myofiber

Table S2A List of gene expressed solely in the myofiber

Table S2B GO term analysis of genes expressed solely in the myofiber

Table S3 Alignment statistics of sequenced reads from young and old myofibers

### Supplemental Figures

Figure S1: **Isolation of total RNA from a single myofiber.** (A) Isolated myofibers after a properly performed dissection and digestion. (B) Counts of the number of satellite cells per fiber in myofibers treated with and without trypsin. (C) Representative picture of a myofiber stained for PAX7 and counterstained with DAPI after no treatment with trypsin. (D) Representative picture of a myofiber stained for PAX7 and counterstained with DAPI after treatment with trypsin. (E) Representative image of cDNA from 20 fibers (20F), 5 fibers (5F), and single fiber (1F) on an agarose gel after library preparation and size selection. Dashed line indicates the range of library size after tagmentation. (F) Representative picture of cDNA from whole muscle on an agarose gel after library preparation and size selection. Dashed line indicates the range of library size after tagmentation.

Figure S2: **IGV snapshots of genes associated with slow and fast muscle fiber types.** Young myofiber tracks are labeled in blue and old are in red. (A) Troponin T3 (*Tnnt3*) expressed in fast skeletal muscle. (B) Troponin I2 (*Tnni2*) expressed in fast skeletal muscle. (C) Troponin T1 (*Tnnt1*) expressed in slow skeletal muscle. (D) Housekeeping gene ribosomal protein S2 (*Rps2*).

**Table S1A: List of genes expressed in the whole muscle but not in the myofiber**

| <b>Gene ID</b>     | <b>Gene Name</b>                                                                                            |
|--------------------|-------------------------------------------------------------------------------------------------------------|
| ENSMUSG00000029561 | 2'-5' oligoadenylate synthetase-like 2(Oasl2)                                                               |
| ENSMUSG00000024899 | 3'-phosphoadenosine 5'-phosphosulfate synthase 2(Papss2)                                                    |
| ENSMUSG00000046598 | 3-hydroxybutyrate dehydrogenase, type 1(Bdh1)                                                               |
| ENSMUSG00000038587 | A kinase (PRKA) anchor protein (gravin) 12(Akap12)                                                          |
| ENSMUSG00000041828 | ATP-binding cassette, sub-family A (ABC1), member 8a(Abca8a)                                                |
| ENSMUSG00000041797 | ATP-binding cassette, sub-family A (ABC1), member 9(Abca9)                                                  |
| ENSMUSG00000026463 | ATPase, Ca <sup>++</sup> transporting, plasma membrane 4(Atp2b4)                                            |
| ENSMUSG00000024451 | ArfGAP with RhoGAP domain, ankyrin repeat and PH domain 3(Arap3)                                            |
| ENSMUSG00000000317 | B cell CLL/lymphoma 6, member B(Bcl6b)                                                                      |
| ENSMUSG00000026278 | BCL2-related ovarian killer(Bok)                                                                            |
| ENSMUSG00000031963 | BMP-binding endothelial regulator(Bmper)                                                                    |
| ENSMUSG00000085208 | BRCA1 interacting protein C-terminal helicase 1, opposite strand(Brip1os)                                   |
| ENSMUSG00000045930 | C-type lectin domain family 14, member a(Clec14a)                                                           |
| ENSMUSG00000025784 | C-type lectin domain family 3, member b(Clec3b)                                                             |
| ENSMUSG00000017446 | C1q and tumor necrosis factor related protein 1(C1qtnf1)                                                    |
| ENSMUSG00000046491 | C1q and tumor necrosis factor related protein 2(C1qtnf2)                                                    |
| ENSMUSG00000058914 | C1q and tumor necrosis factor related protein 3(C1qtnf3)                                                    |
| ENSMUSG00000071347 | C1q and tumor necrosis factor related protein 9(C1qtnf9)                                                    |
| ENSMUSG00000034957 | CCAAT/enhancer binding protein (C/EBP), alpha(Cebpα)                                                        |
| ENSMUSG00000028076 | CD1d1 antigen(Cd1d1)                                                                                        |
| ENSMUSG00000056481 | CD248 antigen, endosialin(Cd248)                                                                            |
| ENSMUSG00000017309 | CD300 molecule like family member G(Cd300lg)                                                                |
| ENSMUSG00000016494 | CD34 antigen(Cd34)                                                                                          |
| ENSMUSG00000029084 | CD38 antigen(Cd38)                                                                                          |
| ENSMUSG00000040747 | CD53 antigen(Cd53)                                                                                          |
| ENSMUSG00000024610 | CD74 antigen (invariant polypeptide of major histocompatibility complex, class II antigen-associated)(Cd74) |
| ENSMUSG00000027435 | CD93 antigen(Cd93)                                                                                          |
| ENSMUSG00000049521 | CDC42 effector protein (Rho GTPase binding) 1(Cdc42ep1)                                                     |
| ENSMUSG00000041598 | CDC42 effector protein (Rho GTPase binding) 4(Cdc42ep4)                                                     |
| ENSMUSG00000031875 | CKLF-like MARVEL transmembrane domain containing 3(Cmtm3)                                                   |
| ENSMUSG00000033883 | DNA segment, Chr 3, ERATO Doi 254, expressed(D3Ertd254e)                                                    |
| ENSMUSG00000020057 | DNA-damage regulated autophagy modulator 1(Dram1)                                                           |
| ENSMUSG00000008398 | ELK3, member of ETS oncogene family(Elk3)                                                                   |
| ENSMUSG00000032349 | ELOVL family member 5, elongation of long chain fatty acids (yeast)(Elovl5)                                 |
| ENSMUSG00000041220 | ELOVL family member 6, elongation of long chain fatty acids (yeast)(Elovl6)                                 |
| ENSMUSG00000038312 | ER degradation enhancer, mannosidase alpha-like 2(Edem2)                                                    |
| ENSMUSG00000038235 | F11 receptor(F11r)                                                                                          |

**Table S1A: List of genes expressed in the whole muscle but not in the myofiber**

| <b>Gene ID</b>     | <b>Gene Name</b>                                                       |
|--------------------|------------------------------------------------------------------------|
| ENSMUSG00000001555 | FK506 binding protein 10(Fkbp10)                                       |
| ENSMUSG00000029648 | FMS-like tyrosine kinase 1(Flt1)                                       |
| ENSMUSG00000034037 | FYVE, RhoGEF and PH domain containing 5(Fgd5)                          |
| ENSMUSG00000058715 | Fc receptor, IgE, high affinity I, gamma polypeptide(Fcgr1g)           |
| ENSMUSG00000059498 | Fc receptor, IgG, low affinity III(Fcgr3)                              |
| ENSMUSG00000026656 | Fc receptor, IgG, low affinity IIb(Fcgr2b)                             |
| ENSMUSG00000015852 | Fc receptor-like 5, scavenger receptor(Fcrls)                          |
| ENSMUSG00000016087 | Friend leukemia integration 1(Fli1)                                    |
| ENSMUSG00000042804 | G protein-coupled receptor 153(Gpr153)                                 |
| ENSMUSG00000022579 | GPI-anchored HDL-binding protein 1(Gpibp1)                             |
| ENSMUSG00000004837 | GRB2-related adaptor protein(Grap)                                     |
| ENSMUSG00000054435 | GTPase, IMAP family member 4(Gimap4)                                   |
| ENSMUSG00000056870 | GULP, engulfment adaptor PTB domain containing 1(Gulp1)                |
| ENSMUSG00000020928 | HIG1 domain family, member 1B(Higd1b)                                  |
| ENSMUSG00000038366 | LIM and SH3 protein 1(Lasp1)                                           |
| ENSMUSG00000024395 | LIM and senescent cell antigen like domains 2(Lims2)                   |
| ENSMUSG00000023022 | LIM domain and actin binding 1(Lima1)                                  |
| ENSMUSG00000071656 | LRRN4 C-terminal like(Lrrn4cl)                                         |
| ENSMUSG00000042228 | LYN proto-oncogene, Src family tyrosine kinase(Lyn)                    |
| ENSMUSG00000036564 | N-myc downstream regulated gene 4(Ndr4)                                |
| ENSMUSG00000040280 | NADH dehydrogenase (ubiquinone) 1 alpha subcomplex, 4-like 2(Ndufa4l2) |
| ENSMUSG00000068245 | PHD finger protein 11D(Phf11d)                                         |
| ENSMUSG00000004768 | RAB23, member RAS oncogene family(Rab23)                               |
| ENSMUSG00000019832 | RAB32, member RAS oncogene family(Rab32)                               |
| ENSMUSG00000024663 | RAB3A interacting protein (rabin3)-like 1(Rab3il1)                     |
| ENSMUSG00000019066 | RAB3D, member RAS oncogene family(Rab3d)                               |
| ENSMUSG00000041696 | RAS-like, family 12(Rasl12)                                            |
| ENSMUSG00000021252 | RIKEN cDNA 0610007P14 gene(0610007P14Rik)                              |
| ENSMUSG00000056313 | RIKEN cDNA 1810011O10 gene(1810011O10Rik)                              |
| ENSMUSG00000044906 | RIKEN cDNA 4930503L19 gene(4930503L19Rik)                              |
| ENSMUSG00000090394 | RIKEN cDNA 4930523C07 gene(4930523C07Rik)                              |
| ENSMUSG00000048489 | RIKEN cDNA 8430408G22 gene(8430408G22Rik)                              |
| ENSMUSG00000041992 | Rap guanine nucleotide exchange factor (GEF) 5(Rapgef5)                |
| ENSMUSG00000044456 | Ras and Rab interactor 3(Rin3)                                         |
| ENSMUSG00000044562 | Ras interacting protein 1(Rasip1)                                      |
| ENSMUSG00000027247 | Rho GTPase activating protein 1(Arhgap1)                               |
| ENSMUSG00000034255 | Rho GTPase activating protein 27(Arhgap27)                             |
| ENSMUSG00000052921 | Rho guanine nucleotide exchange factor (GEF) 15(Arhgef15)              |

**Table S1A: List of genes expressed in the whole muscle but not in the myofiber**

| <b>Gene ID</b>     | <b>Gene Name</b>                                                                                                                                                              |
|--------------------|-------------------------------------------------------------------------------------------------------------------------------------------------------------------------------|
| ENSMUSG00000021895 | Rho guanine nucleotide exchange factor (GEF) 3(Arhgef3)                                                                                                                       |
| ENSMUSG00000030220 | Rho, GDP dissociation inhibitor (GDI) beta(Arhgdib)                                                                                                                           |
| ENSMUSG00000016262 | SERTA domain containing 4(Sertad4)                                                                                                                                            |
| ENSMUSG00000059013 | SH2 domain containing 3C(Sh2d3c)                                                                                                                                              |
| ENSMUSG00000025902 | SRY (sex determining region Y)-box 17(Sox17)                                                                                                                                  |
| ENSMUSG00000046470 | SRY (sex determining region Y)-box 18(Sox18)                                                                                                                                  |
| ENSMUSG00000063060 | SRY (sex determining region Y)-box 7(Sox7)                                                                                                                                    |
| ENSMUSG00000040710 | ST8 alpha-N-acetyl-neuraminide alpha-2,8-sialyltransferase 4(St8sia4)                                                                                                         |
| ENSMUSG00000012428 | STEAP family member 4(Steap4)                                                                                                                                                 |
| ENSMUSG00000034412 | TBC1 domain family, member 10a(Tbc1d10a)                                                                                                                                      |
| ENSMUSG00000037410 | TBC1 domain family, member 2B(Tbc1d2b)                                                                                                                                        |
| ENSMUSG00000030579 | TYRO protein tyrosine kinase binding protein(Tyrobp)                                                                                                                          |
| ENSMUSG00000038296 | UDP-N-acetyl-alpha-D-galactosamine:polypeptide N-acetylgalactosaminyltransferase 18(Galnt18)                                                                                  |
| ENSMUSG00000034911 | Usher syndrome 1C binding protein 1(Ushbp1)                                                                                                                                   |
| ENSMUSG00000069792 | WAP four-disulfide core domain 17(Wfdc17)                                                                                                                                     |
| ENSMUSG00000066357 | WD repeat domain 6(Wdr6)                                                                                                                                                      |
| ENSMUSG00000028041 | a disintegrin and metallopeptidase domain 15 (metargidin)(Adam15)<br>a disintegrin-like and metallopeptidase (reprolysin type) with thrombospondin type 1 motif, 10(Adamts10) |
| ENSMUSG00000001348 | acid phosphatase 5, tartrate resistant(Acp5)                                                                                                                                  |
| ENSMUSG00000032735 | actin binding LIM protein family, member 3(Ablim3)                                                                                                                            |
| ENSMUSG00000000530 | activin A receptor, type II-like 1(Acvr1l)                                                                                                                                    |
| ENSMUSG00000044017 | adhesion G protein-coupled receptor D1(Adgrd1)                                                                                                                                |
| ENSMUSG00000004730 | adhesion G protein-coupled receptor E1(Adgre1)                                                                                                                                |
| ENSMUSG00000056492 | adhesion G protein-coupled receptor F5(Adgrf5)                                                                                                                                |
| ENSMUSG00000039167 | adhesion G protein-coupled receptor L4(Adgrl4)                                                                                                                                |
| ENSMUSG00000048040 | adipocyte-related X-chromosome expressed sequence 2(Arxes2)                                                                                                                   |
| ENSMUSG00000022878 | adiponectin, C1Q and collagen domain containing(Adipoq)                                                                                                                       |
| ENSMUSG00000074207 | alcohol dehydrogenase 1 (class I)(Adh1)                                                                                                                                       |
| ENSMUSG00000013584 | aldehyde dehydrogenase family 1, subfamily A2(Aldh1a2)                                                                                                                        |
| ENSMUSG00000001864 | allograft inflammatory factor 1-like(Aif1l)                                                                                                                                   |
| ENSMUSG00000019326 | amine oxidase, copper containing 3(Aoc3)                                                                                                                                      |
| ENSMUSG00000025270 | aminolevulinic acid synthase 2, erythroid(Alas2)                                                                                                                              |
| ENSMUSG00000033544 | angiopoietin-like 1(Angptl1)                                                                                                                                                  |
| ENSMUSG00000002289 | angiopoietin-like 4(Angptl4)                                                                                                                                                  |
| ENSMUSG00000024659 | annexin A1(Anxa1)                                                                                                                                                             |
| ENSMUSG00000029484 | annexin A3(Anxa3)                                                                                                                                                             |
| ENSMUSG00000033420 | anthrax toxin receptor 1(Antxr1)                                                                                                                                              |

**Table S1A: List of genes expressed in the whole muscle but not in the myofiber**

| <b>Gene ID</b>     | <b>Gene Name</b>                                                                   |
|--------------------|------------------------------------------------------------------------------------|
| ENSMUSG00000044338 | apelin receptor(Aplnr)                                                             |
| ENSMUSG00000009585 | apolipoprotein B mRNA editing enzyme, catalytic polypeptide 3(Apobec3)             |
| ENSMUSG00000022548 | apolipoprotein D(Apod)                                                             |
| ENSMUSG00000004655 | aquaporin 1(Aqp1)                                                                  |
| ENSMUSG00000028427 | aquaporin 7(Aqp7)                                                                  |
| ENSMUSG00000021388 | asporin(Aspn)                                                                      |
| ENSMUSG00000033059 | brain glycogen phosphorylase(Pygb)                                                 |
| ENSMUSG00000040283 | butyrophilin-like 9(Btnl9)                                                         |
| ENSMUSG00000032312 | c-src tyrosine kinase(Csk)                                                         |
| ENSMUSG00000027230 | cAMP responsive element binding protein 3-like 1(Creb3l1)                          |
| ENSMUSG00000038543 | cDNA sequence BC028528(BC028528)                                                   |
| ENSMUSG00000031871 | cadherin 5(Cdh5)                                                                   |
| ENSMUSG00000004665 | calponin 2(Cnn2)                                                                   |
| ENSMUSG00000041261 | carbonic anhydrase 8(Car8)                                                         |
| ENSMUSG00000027408 | carboxypeptidase X 1 (M14 family)(Cpxm1)                                           |
| ENSMUSG00000044006 | cartilage intermediate layer protein 2(Cilp2)                                      |
| ENSMUSG00000042254 | cartilage intermediate layer protein, nucleotide pyrophosphohydrolase(Cilp)        |
| ENSMUSG00000026029 | caspase 8(Casp8)                                                                   |
| ENSMUSG00000028111 | cathepsin K(Ctsk)                                                                  |
| ENSMUSG00000038642 | cathepsin S(Ctss)                                                                  |
| ENSMUSG00000000058 | caveolin 2(Cav2)                                                                   |
| ENSMUSG00000030278 | cell death-inducing DFFA-like effector c(Cidec)                                    |
| ENSMUSG00000024526 | cell death-inducing DNA fragmentation factor, alpha subunit-like effector A(Cidea) |
| ENSMUSG00000050910 | cerebellar degeneration-related protein 2-like(Cdr2l)                              |
| ENSMUSG00000020676 | chemokine (C-C motif) ligand 11(Ccl11)                                             |
| ENSMUSG00000018927 | chemokine (C-C motif) ligand 6(Ccl6)                                               |
| ENSMUSG00000009185 | chemokine (C-C motif) ligand 8(Ccl8)                                               |
| ENSMUSG00000019122 | chemokine (C-C motif) ligand 9(Ccl9)                                               |
| ENSMUSG00000049103 | chemokine (C-C motif) receptor 2(Ccr2)                                             |
| ENSMUSG00000061353 | chemokine (C-X-C motif) ligand 12(Cxcl12)                                          |
| ENSMUSG00000021508 | chemokine (C-X-C motif) ligand 14(Cxcl14)                                          |
| ENSMUSG00000007041 | chloride intracellular channel 1(Clic1)                                            |
| ENSMUSG00000039084 | chondroadherin(Chad)                                                               |
| ENSMUSG00000022225 | chymase 1, mast cell(Cma1)                                                         |
| ENSMUSG00000022512 | claudin 1(Cldn1)                                                                   |
| ENSMUSG00000028128 | coagulation factor III(F3)                                                         |
| ENSMUSG00000039109 | coagulation factor XIII, A1 subunit(F13a1)                                         |
| ENSMUSG00000032878 | coiled-coil domain containing 85A(Ccdc85a)                                         |

**Table S1A: List of genes expressed in the whole muscle but not in the myofiber**

| <b>Gene ID</b>     | <b>Gene Name</b>                                                   |
|--------------------|--------------------------------------------------------------------|
| ENSMUSG00000003208 | coiled-coil domain containing 94(Ccdc94)                           |
| ENSMUSG00000020241 | collagen, type VI, alpha 2(Col6a2)                                 |
| ENSMUSG00000048126 | collagen, type VI, alpha 3(Col6a3)                                 |
| ENSMUSG00000043719 | collagen, type VI, alpha 6(Col6a6)                                 |
| ENSMUSG00000027966 | collagen, type XI, alpha 1(Col11a1)                                |
| ENSMUSG00000022371 | collagen, type XIV, alpha 1(Col14a1)                               |
| ENSMUSG00000028339 | collagen, type XV, alpha 1(Col15a1)                                |
| ENSMUSG00000040690 | collagen, type XVI, alpha 1(Col16a1)                               |
| ENSMUSG00000024621 | colony stimulating factor 1 receptor(Csf1r)                        |
| ENSMUSG00000036896 | complement component 1, q subcomponent, C chain(C1qc)              |
| ENSMUSG00000036887 | complement component 1, q subcomponent, alpha polypeptide(C1qa)    |
| ENSMUSG00000036905 | complement component 1, q subcomponent, beta polypeptide(C1qb)     |
| ENSMUSG00000055172 | complement component 1, r subcomponent A(C1ra)                     |
| ENSMUSG00000038521 | complement component 1, s subcomponent 1(C1s1)                     |
| ENSMUSG00000024164 | complement component 3(C3)                                         |
| ENSMUSG00000073418 | complement component 4B (Chido blood group)(C4b)                   |
| ENSMUSG00000026365 | complement component factor h(Cfh)                                 |
| ENSMUSG00000061780 | complement factor D (adipsin)(Cfd)                                 |
| ENSMUSG00000030707 | coronin, actin binding protein 1A(Coro1a)                          |
| ENSMUSG00000033022 | cysteine dioxygenase 1, cytosolic(Cdo1)                            |
| ENSMUSG00000031825 | cysteine-rich secretory protein LCCL domain containing 2(Crispld2) |
| ENSMUSG00000020638 | cytidine monophosphate (UMP-CMP) kinase 2, mitochondrial(Cmpk2)    |
| ENSMUSG00000061740 | cytochrome P450, family 2, subfamily d, polypeptide 22(Cyp2d22)    |
| ENSMUSG00000025479 | cytochrome P450, family 2, subfamily e, polypeptide 1(Cyp2e1)      |
| ENSMUSG00000028713 | cytochrome P450, family 4, subfamily b, polypeptide 1(Cyp4b1)      |
| ENSMUSG00000015340 | cytochrome b-245, beta polypeptide(Cybb)                           |
| ENSMUSG00000020810 | cytoglobin(Cygb)                                                   |
| ENSMUSG00000044258 | cytotoxic T lymphocyte-associated protein 2 alpha(Ctla2a)          |
| ENSMUSG00000027314 | delta-like 4 (Drosophila)(Dll4)                                    |
| ENSMUSG00000038702 | dermatan sulfate epimerase-like(Dsel)                              |
| ENSMUSG00000028031 | dickkopf WNT signaling pathway inhibitor 2(Dkk2)                   |
| ENSMUSG00000022048 | dihydropyrimidinase-like 2(Dpysl2)                                 |
| ENSMUSG00000024501 | dihydropyrimidinase-like 3(Dpysl3)                                 |
| ENSMUSG00000019278 | dipeptidase 1 (renal)(Dpep1)                                       |
| ENSMUSG00000035000 | dipeptidylpeptidase 4(Dpp4)                                        |
| ENSMUSG00000040631 | docking protein 4(Dok4)                                            |
| ENSMUSG00000026825 | dynamamin 1(Dnm1)                                                  |
| ENSMUSG00000057098 | early B cell factor 1(Ebf1)                                        |

**Table S1A: List of genes expressed in the whole muscle but not in the myofiber**

| <b>Gene ID</b>     | <b>Gene Name</b>                                                                       |
|--------------------|----------------------------------------------------------------------------------------|
| ENSMUSG00000022053 | early B cell factor 2(Ebf2)                                                            |
| ENSMUSG00000015085 | ectonucleoside triphosphate diphosphohydrolase 2(Entpd2)                               |
| ENSMUSG00000029163 | elastin microfibril interfacier 1(Emilin1)                                             |
| ENSMUSG00000024053 | elastin microfibril interfacier 2(Emilin2)                                             |
| ENSMUSG00000029675 | elastin(Eln)                                                                           |
| ENSMUSG00000054690 | endomucin(Emcn)                                                                        |
| ENSMUSG00000073599 | endothelial cell surface expressed chemotaxis and apoptosis regulator(Ecscr)           |
| ENSMUSG00000001946 | endothelial cell-specific adhesion molecule(Esam)                                      |
| ENSMUSG00000022122 | endothelin receptor type B(Ednrb)                                                      |
| ENSMUSG00000031217 | ephrin B1(Efnb1)                                                                       |
| ENSMUSG00000015766 | epidermal growth factor receptor pathway substrate 8(Eps8)                             |
| ENSMUSG00000020467 | epidermal growth factor-containing fibulin-like extracellular matrix protein 1(Efemp1) |
| ENSMUSG00000075010 | expressed sequence AW112010(AW112010)                                                  |
| ENSMUSG00000043631 | extracellular matrix protein 2, female organ and adipocyte specific(Ecm2)              |
| ENSMUSG00000040339 | family with sequence similarity 102, member B(Fam102b)                                 |
| ENSMUSG00000026483 | family with sequence similarity 129, member A(Fam129a)                                 |
| ENSMUSG00000042106 | family with sequence similarity 212, member A(Fam212a)                                 |
| ENSMUSG00000046546 | family with sequence similarity 43, member A(Fam43a)                                   |
| ENSMUSG00000029581 | fascin actin-bundling protein 1(Fscn1)                                                 |
| ENSMUSG00000062515 | fatty acid binding protein 4, adipocyte(Fabp4)                                         |
| ENSMUSG00000027533 | fatty acid binding protein 5, epidermal(Fabp5)                                         |
| ENSMUSG00000010663 | fatty acid desaturase 1(Fads1)                                                         |
| ENSMUSG00000024664 | fatty acid desaturase 3(Fads3)                                                         |
| ENSMUSG00000053158 | feline sarcoma oncogene(Fes)                                                           |
| ENSMUSG00000000392 | fibroblast activation protein(Fap)                                                     |
| ENSMUSG00000041559 | fibromodulin(Fmod)                                                                     |
| ENSMUSG00000006369 | fibulin 1(Fbln1)                                                                       |
| ENSMUSG00000027386 | fibulin 7(Fbln7)                                                                       |
| ENSMUSG00000025278 | filamin, beta(Flnb)                                                                    |
| ENSMUSG00000040181 | flavin containing monooxygenase 1(Fmo1)                                                |
| ENSMUSG00000040170 | flavin containing monooxygenase 2(Fmo2)                                                |
| ENSMUSG00000023008 | formin-like 3(Fmnl3)                                                                   |
| ENSMUSG00000027004 | frizzled-related protein(Frzb)                                                         |
| ENSMUSG00000050953 | gap junction protein, alpha 1(Gja1)                                                    |
| ENSMUSG00000024084 | glutaminyl-peptide cyclotransferase (glutaminyl cyclase)(Qpct)                         |
| ENSMUSG00000033318 | glutathione S-transferase, theta 2(Gstt2)                                              |
| ENSMUSG00000035778 | glycoprotein galactosyltransferase alpha 1, 3(Ggta1)                                   |
| ENSMUSG00000031342 | glycoprotein m6b(Gpm6b)                                                                |



**Table S1A: List of genes expressed in the whole muscle but not in the myofiber**

| <b>Gene ID</b>     | <b>Gene Name</b>                                                   |
|--------------------|--------------------------------------------------------------------|
| ENSMUSG00000055653 | glypican 3(Gpc3)                                                   |
| ENSMUSG00000021556 | golgi membrane protein 1(Golm1)                                    |
| ENSMUSG00000052957 | growth arrest specific 1(Gas1)                                     |
| ENSMUSG00000034201 | growth arrest-specific 2 like 1(Gas2l1)                            |
| ENSMUSG00000079363 | guanylate binding protein 4(Gbp4)                                  |
| ENSMUSG00000033910 | guanylate cyclase 1, soluble, alpha 3(Gucy1a3)                     |
| ENSMUSG00000029298 | guanylate-binding protein 9(Gbp9)                                  |
| ENSMUSG00000032744 | hairy/enhancer-of-split related with YRPW motif-like(Heyl)         |
| ENSMUSG00000031722 | haptoglobin(Hp)                                                    |
| ENSMUSG00000074793 | heat shock protein 12B(Hspa12b)                                    |
| ENSMUSG00000069919 | hemoglobin alpha, adult chain 1(Hba-a1)                            |
| ENSMUSG00000069917 | hemoglobin alpha, adult chain 2(Hba-a2)                            |
| ENSMUSG00000052305 | hemoglobin, beta adult s chain(Hbb-bs)                             |
| ENSMUSG00000073940 | hemoglobin, beta adult t chain(Hbb-bt)                             |
| ENSMUSG00000037012 | hexokinase 1(Hk1)                                                  |
| ENSMUSG00000067235 | histocompatibility 2, Q region locus 10(H2-Q10)                    |
| ENSMUSG00000036594 | histocompatibility 2, class II antigen A, alpha(H2-Aa)             |
| ENSMUSG00000073421 | histocompatibility 2, class II antigen A, beta 1(H2-Ab1)           |
| ENSMUSG00000060586 | histocompatibility 2, class II antigen E beta(H2-Eb1)              |
| ENSMUSG00000031613 | hydroxyprostaglandin dehydrogenase 15 (NAD)(Hpgd)                  |
| ENSMUSG00000043099 | hypermethylated in cancer 1(Hic1)                                  |
| ENSMUSG00000037206 | immunoglobulin superfamily containing leucine-rich repeat(Islr)    |
| ENSMUSG00000003477 | indolethylamine N-methyltransferase(Inmt)                          |
| ENSMUSG00000042745 | inhibitor of DNA binding 1(Id1)                                    |
| ENSMUSG00000038855 | inositol 1,4,5-trisphosphate 3-kinase B(Itpkb)                     |
| ENSMUSG00000017493 | insulin-like growth factor binding protein 4(Igfbp4)               |
| ENSMUSG00000036256 | insulin-like growth factor binding protein 7(Igfbp7)               |
| ENSMUSG00000027111 | integrin alpha 6(Itga6)                                            |
| ENSMUSG00000032925 | integrin, beta-like 1(Itgbl1)                                      |
| ENSMUSG00000025780 | inter-alpha (globulin) inhibitor H5(Itih5)                         |
| ENSMUSG00000001029 | intercellular adhesion molecule 2(Icam2)                           |
| ENSMUSG00000039997 | interferon activated gene 203(Ifi203)                              |
| ENSMUSG00000073489 | interferon activated gene 204(Ifi204)                              |
| ENSMUSG00000054203 | interferon activated gene 205(Ifi205)                              |
| ENSMUSG00000078920 | interferon gamma inducible protein 47(Ifi47)                       |
| ENSMUSG00000045932 | interferon-induced protein with tetratricopeptide repeats 2(Ifit2) |
| ENSMUSG00000024810 | interleukin 33(Il33)                                               |
| ENSMUSG00000029469 | intraflagellar transport 81(Ift81)                                 |

**Table S1A: List of genes expressed in the whole muscle but not in the myofiber**

| <b>Gene ID</b>     | <b>Gene Name</b>                                                    |
|--------------------|---------------------------------------------------------------------|
| ENSMUSG00000047485 | kelch-like 34(Klhl34)                                               |
| ENSMUSG00000019932 | keratocan(Kera)                                                     |
| ENSMUSG00000062960 | kinase insert domain protein receptor(Kdr)                          |
| ENSMUSG00000019846 | laminin, alpha 4(Lama4)                                             |
| ENSMUSG00000001123 | lectin, galactose binding, soluble 9(Lgals9)                        |
| ENSMUSG00000090958 | leucine rich repeat containing 32(Lrrc32)                           |
| ENSMUSG00000016024 | lipopolysaccharide binding protein(Lbp)                             |
| ENSMUSG00000021069 | liver glycogen phosphorylase(Pygl)                                  |
| ENSMUSG00000040249 | low density lipoprotein receptor-related protein 1(Lrp1)            |
| ENSMUSG00000036446 | lumican(Lum)                                                        |
| ENSMUSG00000079018 | lymphocyte antigen 6 complex, locus C1(Ly6c1)                       |
| ENSMUSG00000022587 | lymphocyte antigen 6 complex, locus E(Ly6e)                         |
| ENSMUSG00000021998 | lymphocyte cytosolic protein 1(Lcp1)                                |
| ENSMUSG00000028581 | lysosomal-associated protein transmembrane 5(Laptm5)                |
| ENSMUSG00000069515 | lysozyme 1(Lyz1)                                                    |
| ENSMUSG00000069516 | lysozyme 2(Lyz2)                                                    |
| ENSMUSG00000024529 | lysyl oxidase(Lox)                                                  |
| ENSMUSG00000040950 | macrophage galactose N-acetyl-galactosamine specific lectin 2(Mgl2) |
| ENSMUSG00000078680 | major urinary protein 10(Mup10)                                     |
| ENSMUSG00000020695 | mannose receptor, C type 2(Mrc2)                                    |
| ENSMUSG00000037306 | mannosidase, alpha, class 1C, member 1(Man1c1)                      |
| ENSMUSG00000061068 | mast cell protease 4(Mcpt4)                                         |
| ENSMUSG00000030218 | matrix Gla protein(Mgp)                                             |
| ENSMUSG00000000957 | matrix metalloproteinase 14 (membrane-inserted)(Mmp14)              |
| ENSMUSG00000031740 | matrix metalloproteinase 2(Mmp2)                                    |
| ENSMUSG00000029061 | matrix metalloproteinase 23(Mmp23)                                  |
| ENSMUSG00000020814 | matrix-remodelling associated 7(Mxra7)                              |
| ENSMUSG00000039956 | melanocortin 2 receptor accessory protein(Mrap)                     |
| ENSMUSG00000027820 | membrane metallo endopeptidase(Mme)                                 |
| ENSMUSG00000024678 | membrane-spanning 4-domains, subfamily A, member 4D(Ms4a4d)         |
| ENSMUSG00000001493 | mesenchyme homeobox 1(Meox1)                                        |
| ENSMUSG00000036144 | mesenchyme homeobox 2(Meox2)                                        |
| ENSMUSG00000060572 | microfibrillar-associated protein 2(Mfap2)                          |
| ENSMUSG00000042436 | microfibrillar-associated protein 4(Mfap4)                          |
| ENSMUSG00000048450 | msh homeobox 1(Msx1)                                                |
| ENSMUSG00000041445 | multimerin 2(Mmrn2)                                                 |
| ENSMUSG00000046916 | myc target 1(Myct1)                                                 |
| ENSMUSG00000027375 | myelin and lymphocyte protein, T cell differentiation protein(Mal)  |

**Table S1A: List of genes expressed in the whole muscle but not in the myofiber**

| <b>Gene ID</b>     | <b>Gene Name</b>                                                                |
|--------------------|---------------------------------------------------------------------------------|
| ENSMUSG00000041607 | myelin basic protein(Mbp)                                                       |
| ENSMUSG00000056569 | myelin protein zero(Mpz)                                                        |
| ENSMUSG00000090272 | myeloid nuclear differentiation antigen like(Mndal)                             |
| ENSMUSG00000026697 | myocilin(Myoc)                                                                  |
| ENSMUSG00000018830 | myosin, heavy polypeptide 11, smooth muscle(Myh11)                              |
| ENSMUSG00000053093 | myosin, heavy polypeptide 7, cardiac muscle, beta(Myh7)                         |
| ENSMUSG00000013936 | myosin, light polypeptide 2, regulatory, cardiac, slow(Myl2)                    |
| ENSMUSG00000059741 | myosin, light polypeptide 3(Myl3)                                               |
| ENSMUSG00000022836 | myosin, light polypeptide kinase(Mylk)                                          |
| ENSMUSG00000052384 | negative regulator of reactive oxygen species(Nrros)                            |
| ENSMUSG00000037362 | nephroblastoma overexpressed gene(Nov)                                          |
| ENSMUSG00000067786 | neuronatin(Nnat)                                                                |
| ENSMUSG00000025969 | neuropilin 2(Nrp2)                                                              |
| ENSMUSG00000055254 | neurotrophic tyrosine kinase, receptor, type 2(Ntrk2)                           |
| ENSMUSG00000021806 | nidogen 2(Nid2)                                                                 |
| ENSMUSG00000026222 | nuclear antigen Sp100(Sp100)                                                    |
| ENSMUSG00000072889 | nuclear transcription factor, X-box binding-like 1(Nfxl1)                       |
| ENSMUSG00000027848 | olfactomedin-like 3(Olfml3)                                                     |
| ENSMUSG00000021390 | osteo glycin(Ogn)                                                               |
| ENSMUSG00000035863 | paralemmin(Palm)                                                                |
| ENSMUSG00000027188 | peptidase domain containing associated with muscle regeneration 1(Pamr1)        |
| ENSMUSG00000024011 | peptidase inhibitor 16(Pi16)                                                    |
| ENSMUSG00000053198 | periaxin(Prx)                                                                   |
| ENSMUSG00000030546 | perilipin 1(Plin1)                                                              |
| ENSMUSG00000027750 | periostin, osteoblast specific factor(Postn)                                    |
| ENSMUSG00000020674 | peroxidasin(Pxdn)                                                               |
| ENSMUSG00000000440 | peroxisome proliferator activated receptor gamma(Pparg)                         |
| ENSMUSG00000048960 | phosphatidylinositol-3,4,5-trisphosphate-dependent Rac exchange factor 2(Prex2) |
| ENSMUSG00000027513 | phosphoenolpyruvate carboxykinase 1, cytosolic(Pck1)                            |
| ENSMUSG00000002847 | phospholipase A1 member A(Pla1a)                                                |
| ENSMUSG00000052160 | phospholipase D family, member 4(Pld4)                                          |
| ENSMUSG00000017754 | phospholipid transfer protein(Pltp)                                             |
| ENSMUSG00000013698 | phosphoprotein enriched in astrocytes 15A(Pea15a)                               |
| ENSMUSG00000045658 | phosphotyrosine interaction domain containing 1(Pid1)                           |
| ENSMUSG00000031538 | plasminogen activator, tissue(Plat)                                             |
| ENSMUSG00000029231 | platelet derived growth factor receptor, alpha polypeptide(Pdgfra)              |
| ENSMUSG00000024620 | platelet derived growth factor receptor, beta polypeptide(Pdgfrb)               |
| ENSMUSG00000028073 | platelet endothelial aggregation receptor 1(Pear1)                              |

**Table S1A: List of genes expressed in the whole muscle but not in the myofiber**

| <b>Gene ID</b>     | <b>Gene Name</b>                                                                                      |
|--------------------|-------------------------------------------------------------------------------------------------------|
| ENSMUSG00000029373 | platelet factor 4(Pf4)                                                                                |
| ENSMUSG00000031595 | platelet-derived growth factor receptor-like(Pdgfrl)                                                  |
| ENSMUSG00000032006 | platelet-derived growth factor, D polypeptide(Pdgfd)                                                  |
| ENSMUSG00000020717 | platelet/endothelial cell adhesion molecule 1(Pecam1)                                                 |
| ENSMUSG00000040624 | pleckstrin homology domain containing, family G (with RhoGef domain) member 1(Plekhg1)                |
| ENSMUSG00000031557 | pleckstrin homology domain-containing, family A (phosphoinositide binding specific) member 2(Plekha2) |
| ENSMUSG00000025608 | podocalyxin-like(Podxl)                                                                               |
| ENSMUSG00000001098 | potassium channel tetramerisation domain containing 10(Kctd10)                                        |
| ENSMUSG00000030247 | potassium inwardly-rectifying channel, subfamily J, member 8(Kcnj8)                                   |
| ENSMUSG00000045573 | preproenkephalin(Penk)                                                                                |
| ENSMUSG00000015354 | procollagen C-endopeptidase enhancer 2(Pcolce2)                                                       |
| ENSMUSG00000029718 | procollagen C-endopeptidase enhancer protein(Pcolce)                                                  |
| ENSMUSG00000023191 | prolyl 3-hydroxylase 3(P3h3)                                                                          |
| ENSMUSG00000061119 | prolylcarboxypeptidase (angiotensinase C)(Prcp)                                                       |
| ENSMUSG00000036986 | promyelocytic leukemia(Pml)                                                                           |
| ENSMUSG00000030513 | proprotein convertase subtilisin/kexin type 6(Pcsk6)                                                  |
| ENSMUSG00000021108 | protein kinase C, eta(Prkch)                                                                          |
| ENSMUSG00000041187 | protein kinase D2(Prkd2)                                                                              |
| ENSMUSG00000002997 | protein kinase, cAMP dependent regulatory, type II beta(Prkar2b)                                      |
| ENSMUSG00000020154 | protein tyrosine phosphatase, receptor type, B(Ptprb)                                                 |
| ENSMUSG00000024440 | protocadherin 12(Pcdh12)                                                                              |
| ENSMUSG00000020641 | radical S-adenosyl methionine domain containing 2(Rsad2)                                              |
| ENSMUSG00000001240 | receptor (calcitonin) activity modifying protein 2(Ramp2)                                             |
| ENSMUSG00000030844 | regulator of G-protein signalling 10(Rgs10)                                                           |
| ENSMUSG00000061100 | resistin like alpha(Retnla)                                                                           |
| ENSMUSG00000012705 | resistin(Retn)                                                                                        |
| ENSMUSG00000030110 | ret proto-oncogene(Ret)                                                                               |
| ENSMUSG00000019539 | reticulocalbin 3, EF-hand calcium binding domain(Rcn3)                                                |
| ENSMUSG00000021876 | ribonuclease, RNase A family 4(Rnase4)                                                                |
| ENSMUSG00000063171 | ribosomal protein S4-like(Rps4l)                                                                      |
| ENSMUSG00000033107 | ring finger protein 125(Rnf125)                                                                       |
| ENSMUSG00000020642 | ring finger protein 144A(Rnf144a)                                                                     |
| ENSMUSG00000003581 | ring finger protein 215(Rnf215)                                                                       |
| ENSMUSG00000032125 | roundabout guidance receptor 4(Robo4)                                                                 |
| ENSMUSG00000034463 | scavenger receptor class A, member 3(Scara3)                                                          |
| ENSMUSG00000022032 | scavenger receptor class A, member 5(Scara5)                                                          |
| ENSMUSG00000037936 | scavenger receptor class B, member 1(Scarb1)                                                          |

**Table S1A: List of genes expressed in the whole muscle but not in the myofiber**

| <b>Gene ID</b>      | <b>Gene Name</b>                                                                         |
|---------------------|------------------------------------------------------------------------------------------|
| ENSMUSG00000038188  | scavenger receptor class F, member 1(Scarf1)                                             |
| ENSMUSG00000012017  | scavenger receptor class F, member 2(Scarf2)                                             |
| ENSMUSG000000035279 | scavenger receptor cysteine rich family, 5 domains(Ssc5d)                                |
| ENSMUSG000000072620 | schlafen 2(Slfn2)                                                                        |
| ENSMUSG000000054404 | schlafen 5(Slfn5)                                                                        |
| ENSMUSG000000018822 | secreted frizzled-related sequence protein 5(Sfrp5)                                      |
| ENSMUSG000000029304 | secreted phosphoprotein 1(Spp1)                                                          |
| ENSMUSG000000020486 | septin 4(Sept4)                                                                          |
| ENSMUSG000000018398 | septin 8(Sept8)                                                                          |
| ENSMUSG000000020077 | serglycin(Srgn)                                                                          |
| ENSMUSG000000034810 | sodium channel, voltage-gated, type VII, alpha(Scn7a)                                    |
| ENSMUSG000000017756 | solute carrier family 12, member 7(Slc12a7)                                              |
| ENSMUSG000000003528 | solute carrier family 25 (mitochondrial carrier, citrate transporter), member 1(Slc25a1) |
| ENSMUSG000000040441 | solute carrier family 26, member 10(Slc26a10)                                            |
| ENSMUSG000000027219 | solute carrier family 28 (sodium-coupled nucleoside transporter), member 2(Slc28a2)      |
| ENSMUSG000000020264 | solute carrier family 36 (proton/amino acid symporter), member 2(Slc36a2)                |
| ENSMUSG000000034401 | spermatogenesis associated 6(Spata6)                                                     |
| ENSMUSG000000045092 | sphingosine-1-phosphate receptor 1(S1pr1)                                                |
| ENSMUSG000000067586 | sphingosine-1-phosphate receptor 3(S1pr3)                                                |
| ENSMUSG000000037379 | spondin 2, extracellular matrix protein(Spon2)                                           |
| ENSMUSG000000042286 | stabilin 1(Stab1)                                                                        |
| ENSMUSG000000047735 | sterile alpha motif domain containing 9-like(Samd9l)                                     |
| ENSMUSG000000030711 | sulfotransferase family 1A, phenol-preferring, member 1(Sult1a1)                         |
| ENSMUSG000000072941 | superoxide dismutase 3, extracellular(Sod3)                                              |
| ENSMUSG000000028369 | sushi, von Willebrand factor type A, EGF and pentraxin domain containing 1(Svep1)        |
| ENSMUSG000000090084 | sushi-repeat-containing protein(Srpx)                                                    |
| ENSMUSG000000031253 | sushi-repeat-containing protein, X-linked 2(Srpx2)                                       |
| ENSMUSG000000025743 | syndecan 3(Sdc3)                                                                         |
| ENSMUSG000000046314 | syntaxin binding protein 6 (amisyn)(Stxbp6)                                              |
| ENSMUSG000000023064 | synuclein, gamma(Sncg)                                                                   |
| ENSMUSG000000033327 | tenascin XB(Tnxb)                                                                        |
| ENSMUSG000000031250 | tenomodulin(Tnmd)                                                                        |
| ENSMUSG000000027217 | tetraspanin 18(Tspan18)                                                                  |
| ENSMUSG000000027858 | tetraspanin 2(Tspan2)                                                                    |
| ENSMUSG000000075273 | tetratricopeptide repeat domain 30B(Ttc30b)                                              |
| ENSMUSG000000028047 | thrombospondin 3(Thbs3)                                                                  |
| ENSMUSG000000030317 | tissue inhibitor of metalloproteinase 4(Timp4)                                           |
| ENSMUSG000000068079 | transcription factor 15(Tcf15)                                                           |

**Table S1A: List of genes expressed in the whole muscle but not in the myofiber**

| <b>Gene ID</b>     | <b>Gene Name</b>                                                               |
|--------------------|--------------------------------------------------------------------------------|
| ENSMUSG00000068735 | transformation related protein 53 inducible protein 11(Trp53i11)               |
| ENSMUSG00000027800 | transmembrane 4 superfamily member 1(Tm4sf1)                                   |
| ENSMUSG00000023367 | transmembrane protein 176A(Tmem176a)                                           |
| ENSMUSG00000024168 | transmembrane protein 204(Tmem204)                                             |
| ENSMUSG00000041737 | transmembrane protein 45b(Tmem45b)                                             |
| ENSMUSG00000026109 | transmembrane protein with EGF-like and two follistatin-like domains 2(Tmeff2) |
| ENSMUSG00000030921 | tripartite motif-containing 30A(Trim30a)                                       |
| ENSMUSG00000032186 | tropomodulin 2(Tmod2)                                                          |
| ENSMUSG00000091898 | troponin C, cardiac/slow skeletal(Tnnc1)                                       |
| ENSMUSG00000026418 | troponin I, skeletal, slow 1(Tnni1)                                            |
| ENSMUSG00000033825 | tryptase beta 2(Tpsb2)                                                         |
| ENSMUSG00000028776 | tubulointerstitial nephritis antigen-like 1(Tinagl1)                           |
| ENSMUSG00000062210 | tumor necrosis factor, alpha-induced protein 8(Tnfaip8)                        |
| ENSMUSG00000032175 | tyrosine kinase 2(Tyk2)                                                        |
| ENSMUSG00000033191 | tyrosine kinase with immunoglobulin-like and EGF-like domains 1(Tie1)          |
| ENSMUSG00000027078 | ubiquitin-conjugating enzyme E2L 6(Ube2l6)                                     |
| ENSMUSG00000032596 | ubiquitin-like modifier activating enzyme 7(Uba7)                              |
| ENSMUSG00000036908 | unc-93 homolog B1 (C. elegans)(Unc93b1)                                        |
| ENSMUSG00000031710 | uncoupling protein 1 (mitochondrial, proton carrier)(Ucp1)                     |
| ENSMUSG00000033685 | uncoupling protein 2 (mitochondrial, proton carrier)(Ucp2)                     |
| ENSMUSG00000062101 | zinc finger protein 119b(Zfp119b)                                              |
| ENSMUSG00000029587 | zinc finger protein 12(Zfp12)                                                  |
| ENSMUSG00000047603 | zinc finger protein 235(Zfp235)                                                |
| ENSMUSG00000002617 | zinc finger protein 40(Zfp40)                                                  |
| ENSMUSG00000053600 | zinc finger protein 472(Zfp472)                                                |
| ENSMUSG00000071281 | zinc finger protein 65(Zfp65)                                                  |
| ENSMUSG00000030469 | zinc finger protein 719(Zfp719)                                                |
| ENSMUSG00000095432 | zinc finger protein 748(Zfp748)                                                |
| ENSMUSG00000095325 | zinc finger protein 870(Zfp870)                                                |
| ENSMUSG00000066000 | zinc finger protein 979(Zfp979)                                                |

---

\* Defined genes as expressed solely in the whole muscle if the reads per million (RPM) of the gene was greater or equal to 10 in the whole muscle and 0 in the single myofiber

**Table S1B: Go term analysis of genes expressed in the whole muscle but not in the myofiber**

| Annotation Cluster 1 |                                         |       |             | Enrichment Score: 30.313113382224095 |            |          |           |                 |            |           |          |
|----------------------|-----------------------------------------|-------|-------------|--------------------------------------|------------|----------|-----------|-----------------|------------|-----------|----------|
| Category             | Term                                    | Count | %           | PValue                               | List Total | Pop Hits | Pop Total | Fold Enrichment | Bonferroni | Benjamini | FDR      |
| UP_KEYWORDS          | Glycoprotein                            | 192   | 43.14606742 | 2.05E-39                             | 445        | 3815     | 22680     | 2.565013916     | 5.83E-37   | 5.83E-37  | 2.72E-36 |
| UP_KEYWORDS          | Disulfide bond                          | 171   | 38.42696629 | 8.74E-39                             | 445        | 3124     | 22680     | 2.789768231     | 2.48E-36   | 1.24E-36  | 1.16E-35 |
| UP_SEQ_FEATURE       | signal peptide                          | 181   | 40.6741573  | 1.32E-38                             | 402        | 3124     | 18012     | 2.595992509     | 1.85E-35   | 1.85E-35  | 2.17E-35 |
| UP_KEYWORDS          | Signal                                  | 199   | 44.71910112 | 1.75E-32                             | 445        | 4543     | 22680     | 2.232509825     | 4.97E-30   | 1.66E-30  | 2.32E-29 |
| UP_KEYWORDS          | Secreted                                | 112   | 25.16853933 | 5.28E-31                             | 445        | 1685     | 22680     | 3.387670456     | 1.50E-28   | 3.75E-29  | 6.99E-28 |
| UP_SEQ_FEATURE       | disulfide bond                          | 146   | 32.80898876 | 9.31E-30                             | 402        | 2510     | 18012     | 2.606243682     | 1.30E-26   | 6.52E-27  | 1.53E-26 |
| GOTERM_CC_DIRECT     | GO:0005576~extracellular region         | 118   | 26.51685393 | 3.62E-29                             | 431        | 1753     | 19662     | 3.070792794     | 1.11E-26   | 1.11E-26  | 4.86E-26 |
| UP_SEQ_FEATURE       | glycosylation site:N-linked (GlcNAc...) | 167   | 37.52808989 | 6.81E-24                             | 402        | 3563     | 18012     | 2.100083361     | 9.55E-21   | 3.18E-21  | 1.12E-20 |
| GOTERM_CC_DIRECT     | GO:0005615~extracellular space          | 86    | 19.3258427  | 3.04E-16                             | 431        | 1504     | 19662     | 2.608561238     | 1.02E-13   | 2.03E-14  | 4.44E-13 |

  

| Annotation Cluster 2 |                                               |       |             | Enrichment Score: 18.007103024438535 |            |          |           |                 |            |           |          |
|----------------------|-----------------------------------------------|-------|-------------|--------------------------------------|------------|----------|-----------|-----------------|------------|-----------|----------|
| Category             | Term                                          | Count | %           | PValue                               | List Total | Pop Hits | Pop Total | Fold Enrichment | Bonferroni | Benjamini | FDR      |
| GOTERM_CC_DIRECT     | GO:0005578~proteinaceous extracellular matrix | 41    | 9.213483146 | 2.14E-19                             | 431        | 316      | 19662     | 5.918984405     | 6.53E-17   | 2.18E-17  | 2.87E-16 |
| GOTERM_CC_DIRECT     | GO:0031012~extracellular matrix               | 39    | 8.764044944 | 8.56E-19                             | 431        | 294      | 19662     | 6.051564942     | 2.61E-16   | 6.53E-17  | 1.15E-15 |
| UP_KEYWORDS          | Extracellular matrix                          | 33    | 7.415730337 | 5.20E-18                             | 445        | 235      | 22680     | 7.156968683     | 1.48E-15   | 2.95E-16  | 6.89E-15 |

  

| Annotation Cluster 3 |                                        |       |             | Enrichment Score: 9.933643540042675 |            |          |           |                 |            |           |          |
|----------------------|----------------------------------------|-------|-------------|-------------------------------------|------------|----------|-----------|-----------------|------------|-----------|----------|
| Category             | Term                                   | Count | %           | PValue                              | List Total | Pop Hits | Pop Total | Fold Enrichment | Bonferroni | Benjamini | FDR      |
| GOTERM_CC_DIRECT     | GO:0005581~collagen trimer             | 20    | 4.494382022 | 1.36E-14                            | 431        | 83       | 19662     | 10.99264809     | 4.17E-12   | 6.94E-13  | 1.83E-11 |
| UP_KEYWORDS          | Collagen                               | 19    | 4.269662921 | 4.59E-14                            | 445        | 85       | 22680     | 11.3924653      | 1.30E-11   | 2.17E-12  | 6.08E-11 |
| INTERPRO             | IPR008160:Collagen triple helix repeat | 18    | 4.04494382  | 2.75E-13                            | 434        | 76       | 20594     | 11.2385399      | 2.15E-10   | 2.15E-10  | 4.21E-10 |
| UP_SEQ_FEATURE       | domain:C1q                             | 11    | 2.471910112 | 3.67E-10                            | 402        | 29       | 18012     | 16.99536799     | 5.15E-07   | 1.29E-07  | 6.05E-07 |

**Table S1B: Go term analysis of genes expressed in the whole muscle but not in the myofiber**

|                |                                                            |    |             |          |     |    |       |             |          |          |          |
|----------------|------------------------------------------------------------|----|-------------|----------|-----|----|-------|-------------|----------|----------|----------|
| INTERPRO       | IPR001073:Complement C1q protein                           | 11 | 2.471910112 | 6.50E-10 | 434 | 32 | 20594 | 16.31149194 | 5.07E-07 | 1.69E-07 | 9.94E-07 |
| SMART          | SM00110:C1Q                                                | 11 | 2.471910112 | 2.20E-09 | 282 | 29 | 10425 | 14.02237711 | 4.07E-07 | 2.03E-07 | 2.72E-06 |
| UP_KEYWORDS    | Hydroxylation                                              | 14 | 3.146067416 | 1.65E-08 | 445 | 88 | 22680 | 8.108273749 | 4.69E-06 | 3.91E-07 | 2.19E-05 |
| UP_SEQ_FEATURE | domain:Collagen-like IPR008983:Tumour necrosis factor-like | 10 | 2.247191011 | 2.95E-08 | 402 | 33 | 18012 | 13.57756671 | 4.14E-05 | 8.28E-06 | 4.87E-05 |
| INTERPRO       | domain                                                     | 11 | 2.471910112 | 9.00E-08 | 434 | 51 | 20594 | 10.23466161 | 7.03E-05 | 1.00E-05 | 1.38E-04 |

| Annotation Cluster 4 |                                      | Enrichment Score: 9.64402947910352 |             |          |            |          |           |                 |            |           |          |
|----------------------|--------------------------------------|------------------------------------|-------------|----------|------------|----------|-----------|-----------------|------------|-----------|----------|
| Category             | Term                                 | Count                              | %           | PValue   | List Total | Pop Hits | Pop Total | Fold Enrichment | Bonferroni | Benjamini | FDR      |
| UP_KEYWORDS          | Immunity<br>GO:0002376~immune        | 35                                 | 7.865168539 | 8.64E-13 | 445        | 401      | 22680     | 4.448429488     | 2.45E-10   | 3.51E-11  | 1.15E-09 |
| GOTERM_BP_DIRECT     | system process                       | 34                                 | 7.640449438 | 3.88E-11 | 406        | 383      | 18082     | 3.95367143      | 8.25E-08   | 2.75E-08  | 6.71E-08 |
| UP_KEYWORDS          | Innate immunity<br>GO:0045087~innate | 23                                 | 5.168539326 | 2.55E-09 | 445        | 241      | 22680     | 4.864002984     | 7.25E-07   | 6.59E-08  | 3.38E-06 |
| GOTERM_BP_DIRECT     | immune response                      | 30                                 | 6.741573034 | 3.10E-08 | 406        | 400      | 18082     | 3.340270936     | 6.61E-05   | 1.65E-05  | 5.37E-05 |

| Annotation Cluster 5 |                                                                  | Enrichment Score: 5.681420312630552 |             |          |            |          |           |                 |            |           |            |
|----------------------|------------------------------------------------------------------|-------------------------------------|-------------|----------|------------|----------|-----------|-----------------|------------|-----------|------------|
| Category             | Term                                                             | Count                               | %           | PValue   | List Total | Pop Hits | Pop Total | Fold Enrichment | Bonferroni | Benjamini | FDR        |
| UP_KEYWORDS          | EGF-like domain                                                  | 25                                  | 5.617977528 | 1.70E-11 | 445        | 224      | 22680     | 5.688202247     | 4.81E-09   | 6.02E-10  | 2.25E-08   |
| INTERPRO             | IPR000742:Epidermal growth factor-like domain                    | 26                                  | 5.842696629 | 3.99E-11 | 434        | 237      | 20594     | 5.205662175     | 3.12E-08   | 1.56E-08  | 6.10E-08   |
| SMART                | SM00181:EGF                                                      | 24                                  | 5.393258427 | 5.45E-10 | 282        | 181      | 10425     | 4.901845539     | 1.01E-07   | 1.01E-07  | 6.75E-07   |
| INTERPRO             | IPR013032:EGF-like, conserved site                               | 22                                  | 4.943820225 | 1.23E-09 | 434        | 197      | 20594     | 5.299164893     | 9.57E-07   | 2.39E-07  | 1.87E-06   |
| INTERPRO             | IPR009030:Insulin-like growth factor binding protein, N-terminal | 17                                  | 3.820224719 | 1.50E-08 | 434        | 130      | 20594     | 6.205210918     | 1.18E-05   | 2.35E-06  | 2.30E-05   |
| INTERPRO             | IPR001881:EGF-like calcium-binding                               | 16                                  | 3.595505618 | 6.67E-08 | 434        | 126      | 20594     | 6.025601639     | 5.21E-05   | 8.69E-06  | 1.02E-04   |
| INTERPRO             | IPR018097:EGF-like calcium-binding, conserved site               | 13                                  | 2.921348315 | 9.10E-07 | 434        | 97       | 20594     | 6.359494513     | 7.11E-04   | 8.89E-05  | 0.00139305 |



**Table S1B: Go term analysis of genes expressed in the whole muscle but not in the myofiber**

|                  |                                                            |    |             |             |     |     |       |             |             |             |            |
|------------------|------------------------------------------------------------|----|-------------|-------------|-----|-----|-------|-------------|-------------|-------------|------------|
| INTERPRO         | IPR000152:EGF-type aspartate/asparagine hydroxylation site | 13 | 2.921348315 | 1.02E-06    | 434 | 98  | 20594 | 6.294601712 | 7.95E-04    | 7.95E-05    | 0.00155766 |
| SMART            | SM00179:EGF_CA domain:EGF-like 3;                          | 16 | 3.595505618 | 1.39E-06    | 282 | 126 | 10425 | 4.694360014 | 2.57E-04    | 8.58E-05    | 0.00172126 |
| UP_SEQ_FEATURE   | calcium-binding                                            | 9  | 2.02247191  | 2.32E-06    | 402 | 40  | 18012 | 10.08134328 | 0.003246306 | 3.61E-04    | 0.00382194 |
| UP_SEQ_FEATURE   | domain:EGF-like 1                                          | 13 | 2.921348315 | 6.81E-06    | 402 | 111 | 18012 | 5.247546054 | 0.009508256 | 7.96E-04    | 0.01122915 |
| GOTERM_MF_DIRECT | GO:0005509~calcium ion binding                             | 35 | 7.865168539 | 1.52E-05    | 387 | 699 | 17446 | 2.257229782 | 0.009147045 | 0.002294647 | 0.02248753 |
| UP_SEQ_FEATURE   | domain:EGF-like 5; calcium-binding                         | 6  | 1.348314607 | 5.62E-04    | 402 | 31  | 18012 | 8.672123255 | 0.545511121 | 0.042864302 | 0.92264157 |
| INTERPRO         | IPR026823:Complement C1r-like EGF domain                   | 5  | 1.123595506 | 8.68E-04    | 434 | 21  | 20594 | 11.29800307 | 0.492635322 | 0.026776002 | 1.32058727 |
| UP_SEQ_FEATURE   | domain:EGF-like 2; calcium-binding                         | 7  | 1.573033708 | 0.00100527  | 402 | 52  | 18012 | 6.031572905 | 0.75588045  | 0.062084414 | 1.64381279 |
| UP_SEQ_FEATURE   | domain:EGF-like 4; calcium-binding                         | 5  | 1.123595506 | 0.005315511 | 402 | 32  | 18012 | 7.000932836 | 0.999431338 | 0.214189402 | 8.40842625 |
| UP_SEQ_FEATURE   | domain:EGF-like 6; calcium-binding                         | 4  | 0.898876404 | 0.013936214 | 402 | 23  | 18012 | 7.792342635 | 0.999999997 | 0.412443985 | 20.6481122 |
| UP_SEQ_FEATURE   | domain:EGF-like 7; calcium-binding                         | 3  | 0.674157303 | 0.106091194 | 402 | 25  | 18012 | 5.376716418 | 0.999999991 | 0.914292865 | 84.2480679 |

| Annotation Cluster 6 |                                                                | Enrichment Score: 4.952322000714141 |             |          |            |          |           |                 |             |             |            |
|----------------------|----------------------------------------------------------------|-------------------------------------|-------------|----------|------------|----------|-----------|-----------------|-------------|-------------|------------|
| Category             | Term                                                           | Count                               | %           | PValue   | List Total | Pop Hits | Pop Total | Fold Enrichment | Bonferroni  | Benjamini   | FDR        |
| INTERPRO             | IPR001134:Netrin domain                                        | 7                                   | 1.573033708 | 4.68E-06 | 434        | 22       | 20594     | 15.09824047     | 0.003647914 | 3.32E-04    | 0.0071599  |
| UP_SEQ_FEATURE       | domain:NTR                                                     | 7                                   | 1.573033708 | 4.79E-06 | 402        | 21       | 18012     | 14.93532338     | 0.006698724 | 6.72E-04    | 0.00790007 |
| INTERPRO             | IPR008993:Tissue inhibitor of metalloproteinases-like, OB-fold | 7                                   | 1.573033708 | 8.15E-06 | 434        | 24       | 20594     | 13.84005376     | 0.006341399 | 4.54E-04    | 0.01246302 |
| INTERPRO             | IPR018933:Netrin module, non-TIMP type                         | 6                                   | 1.348314607 | 2.02E-05 | 434        | 17       | 20594     | 16.74762808     | 0.015625636 | 9.26E-04    | 0.03085110 |
| SMART                | SM00643:C345C                                                  | 6                                   | 1.348314607 | 4.70E-05 | 282        | 16       | 10425     | 13.86303191     | 0.008655407 | 0.001737106 | 0.05812725 |

**Table S1B: Go term analysis of genes expressed in the whole muscle but not in the myofiber**

| Annotation Cluster 7 |                                                     |       |             | Enrichment Score: 3.8982336681686043 |            |          |           |                 |            |            |            |
|----------------------|-----------------------------------------------------|-------|-------------|--------------------------------------|------------|----------|-----------|-----------------|------------|------------|------------|
| Category             | Term                                                | Count | %           | PValue                               | List Total | Pop Hits | Pop Total | Fold Enrichment | Bonferroni | Benjamini  | FDR        |
| KEGG_PATHWAY         | mmu04510:Focal adhesion                             | 19    | 4.269662921 | 1.98E-06                             | 185        | 207      | 7691      | 3.815876746     | 3.88E-04   | 1.29E-04   | 0.00247143 |
| KEGG_PATHWAY         | mmu04512:ECM-receptor interaction                   | 10    | 2.247191011 | 2.37E-04                             | 185        | 88       | 7691      | 4.724201474     | 0.0453813  | 0.00771068 | 0.29557941 |
| KEGG_PATHWAY         | mmu04151:PI3K-Akt signaling pathway                 | 18    | 4.04494382  | 0.00430                              | 9013       | 185      | 351       | 2.131947332     | 0.5710398  | 0.07405891 | 5.25173151 |
|                      |                                                     |       |             |                                      |            |          |           |                 | 78         | 1          | 2          |
| Annotation Cluster 8 |                                                     |       |             | Enrichment Score: 3.807503589908664  |            |          |           |                 |            |            |            |
| Category             | Term                                                | Count | %           | PValue                               | List Total | Pop Hits | Pop Total | Fold Enrichment | Bonferroni | Benjamini  | FDR        |
| KEGG_PATHWAY         | mmu05150:Staphylococcus aureus infection            | 14    | 3.146067416 | 9.02E-11                             | 185        | 50       | 7691      | 11.64043243     | 1.77E-08   | 1.77E-08   | 1.13E-07   |
| GOTERM_CC_DIRECT     | GO:0072562~blood microparticle                      | 15    | 3.370786517 | 1.33E-06                             | 431        | 133      | 19662     | 5.145055213     | 4.06E-04   | 4.06E-05   | 0.00178374 |
| KEGG_PATHWAY         | mmu04610:Complement and coagulation cascades        | 12    | 2.696629213 | 1.61E-06                             | 185        | 76       | 7691      | 6.564153627     | 3.16E-04   | 1.58E-04   | 0.00201484 |
| UP_KEYWORDS          | Complement pathway                                  | 7     | 1.573033708 | 1.14E-05                             | 445        | 27       | 22680     | 13.21348315     | 0.0032220  | 1.90E-04   | 0.01505725 |
| BIOCARTA             | m_compPathway:Complement Pathway                    | 7     | 1.573033708 | 6.37E-05                             | 57         | 18       | 1289      | 8.794346979     | 0.0062848  | 0.00628481 | 0.07052567 |
| BIOCARTA             | m_classicPathway:Classical Complement Pathway       | 6     | 1.348314607 | 8.13E-05                             | 57         | 12       | 1289      | 11.30701754     | 0.0080119  | 0.00401404 | 0.08997651 |
| GOTERM_BP_DIRECT     | GO:0006958~complement activation, classical pathway | 7     | 1.573033708 | 0.00139                              | 617        | 406      | 55        | 18082           | 0.9489282  | 0.08376828 | 2.39063289 |
| GOTERM_BP_DIRECT     | GO:0006956~complement activation                    | 4     | 0.898876404 | 0.00415                              | 3138       | 406      | 15        | 18082           | 0.9998581  | 0.1718161  | 6.95404187 |
| KEGG_PATHWAY         | mmu05133:Pertussis                                  | 7     | 1.573033708 | 0.00833                              | 0798       | 185      | 74        | 7691            | 0.8059570  | 0.12771550 | 9.92327271 |
| KEGG_PATHWAY         | mmu05322:Systemic lupus erythematosus               | 10    | 2.247191011 | 0.00856                              | 6306       | 185      | 147       | 7691            | 0.8147832  | 0.12164979 | 10.1901473 |
| KEGG_PATHWAY         | mmu05020:Prion diseases                             | 3     | 0.674157303 | 0.18631                              | 1812       | 185      | 33        | 7691            | 2.8280934  | 0.65473556 | 92.3897763 |
|                      |                                                     |       |             |                                      |            |          |           |                 | 7          | 2          | 6          |
|                      |                                                     |       |             |                                      |            |          |           |                 | 1          | 1          | 9          |

**Table S1B: Go term analysis of genes expressed in the whole muscle but not in the myofiber**

| KEGG_PATHWAY                 | mmu05142:Chagas disease (American trypanosomiasis) | 5                                          | 1.123595506 | 0.23258  | 4394       | 185      | 103       | 7691            | 2.018105484 | 1          | 0.70080553 | 96.3377666 |
|------------------------------|----------------------------------------------------|--------------------------------------------|-------------|----------|------------|----------|-----------|-----------------|-------------|------------|------------|------------|
| <b>Annotation Cluster 9</b>  |                                                    | <b>Enrichment Score: 3.708834845849344</b> |             |          |            |          |           |                 |             |            |            |            |
| Category                     | Term                                               | Count                                      | %           | PValue   | List Total | Pop Hits | Pop Total | Fold Enrichment | Bonferroni  | Benjamini  | FDR        |            |
| UP_KEYWORDS                  | Sushi                                              | 9                                          | 2.02247191  | 3.26E-06 | 445        | 47       | 22680     | 9.759502749     | 9.26E-04    | 5.79E-05   | 0.00432246 |            |
| INTERPRO                     | IPR000436:Sushi/SCR/CCP                            | 9                                          | 2.02247191  | 2.10E-05 | 434        | 56       | 20594     | 7.626152074     | 0.0162779   | 9.11E-04   | 0.03214953 |            |
| UP_SEQ_FEATURE               | domain:Sushi 2                                     | 7                                          | 1.573033708 | 1.10E-04 | 402        | 35       | 18012     | 8.96119403      | 0.1431260   | 0.01024479 | 0.18139771 |            |
| UP_SEQ_FEATURE               | domain:Sushi 1                                     | 7                                          | 1.573033708 | 1.10E-04 | 402        | 35       | 18012     | 8.96119403      | 0.1431260   | 0.01024479 | 0.18139771 |            |
| SMART                        | SM00032:CCP                                        | 8                                          | 1.797752809 | 5.74E-04 | 282        | 54       | 10425     | 5.476753349     | 0.1008047   | 0.01506467 | 0.70817355 |            |
| INTERPRO                     | IPR003410:Hyalin                                   | 3                                          | 0.674157303 | 0.00130  | 4758       | 434      | 3         | 20594           | 0.6392900   | 0.03576205 | 1.97796280 |            |
| UP_SEQ_FEATURE               | domain:Sushi 3                                     | 4                                          | 0.898876404 | 0.01751  | 755        | 402      | 25        | 18012           | 7.168955224 | 0.45355601 | 25.2663597 |            |
| <b>Annotation Cluster 10</b> |                                                    | <b>Enrichment Score: 3.128258217689208</b> |             |          |            |          |           |                 |             |            |            |            |
| Category                     | Term                                               | Count                                      | %           | PValue   | List Total | Pop Hits | Pop Total | Fold Enrichment | Bonferroni  | Benjamini  | FDR        |            |
| UP_SEQ_FEATURE               | topological domain:Extracellular                   | 90                                         | 20.2247191  | 3.67E-08 | 402        | 2256     | 18012     | 1.787472213     | 5.15E-05    | 8.58E-06   | 6.05E-05   |            |
| GOTERM_CC_DIRECT             | GO:0016020~membrane                                | 203                                        | 45.61797753 | 6.15E-07 | 431        | 6998     | 19662     | 1.323343295     | 1.88E-04    | 2.35E-05   | 8.24E-04   |            |
| UP_SEQ_FEATURE               | topological domain:Cytoplasmic                     | 99                                         | 22.24719101 | 6.61E-06 | 402        | 2880     | 18012     | 1.540205224     | 0.0092235   | 8.42E-04   | 0.01089138 |            |
| UP_SEQ_FEATURE               | transmembrane region GO:0005886~plasma             | 124                                        | 27.86516854 | 0.00110  | 2916       | 402      | 4312      | 1.288483372     | 0.7871446   | 0.06505451 | 1.80212436 |            |
| GOTERM_CC_DIRECT             | membrane                                           | 134                                        | 30.11235955 | 0.00208  | 3844       | 431      | 4874      | 1.254208371     | 0.4707189   | 0.03472903 | 2.75588953 |            |
| UP_KEYWORDS                  | Membrane                                           | 193                                        | 43.37078652 | 0.01742  | 4551       | 445      | 8683      | 1.132845144     | 0.9932092   | 0.10961161 | 20.7793418 |            |

**Table S1B: Go term analysis of genes expressed in the whole muscle but not in the myofiber**

|                  |                                           |     |             |                 |     |      |       |             |   |                 |                 |
|------------------|-------------------------------------------|-----|-------------|-----------------|-----|------|-------|-------------|---|-----------------|-----------------|
| UP_KEYWORDS      | Transmembrane                             | 149 | 33.48314607 | 0.11963<br>2998 | 445 | 6955 | 22680 | 1.091873117 | 1 | 0.38676283<br>3 | 81.5190864<br>2 |
| UP_KEYWORDS      | Transmembrane helix                       | 146 | 32.80898876 | 0.18307<br>073  | 445 | 6938 | 22680 | 1.072510616 | 1 | 0.50784315<br>8 | 93.1398935<br>5 |
| GOTERM_CC_DIRECT | GO:0016021~integral component of membrane | 151 | 33.93258427 | 0.53549<br>5683 | 431 | 6878 | 19662 | 1.001532847 | 1 | 0.91911469<br>5 | 99.9965425      |

| <b>Annotation Cluster 11</b>               |                          |              |             |                 |                   |                 |                  |                        |                   |                  |                 |
|--------------------------------------------|--------------------------|--------------|-------------|-----------------|-------------------|-----------------|------------------|------------------------|-------------------|------------------|-----------------|
| <b>Enrichment Score: 2.960381357218414</b> |                          |              |             |                 |                   |                 |                  |                        |                   |                  |                 |
| <b>Category</b>                            | <b>Term</b>              | <b>Count</b> | <b>%</b>    | <b>PValue</b>   | <b>List Total</b> | <b>Pop Hits</b> | <b>Pop Total</b> | <b>Fold Enrichment</b> | <b>Bonferroni</b> | <b>Benjamini</b> | <b>FDR</b>      |
| GOTERM_CC_DIRECT                           | GO:0001725~stress fiber  | 9            | 2.02247191  | 1.03E-04        | 431               | 67              | 19662            | 6.127991135            | 0.0310538<br>41   | 0.00225076<br>5  | 0.13846647<br>4 |
| UP_KEYWORDS                                | Actin-binding            | 14           | 3.146067416 | 0.00148<br>3938 | 445               | 252             | 22680            | 2.831460674            | 0.3441028<br>45   | 0.01609034<br>8  | 1.94863288<br>3 |
| GOTERM_MF_DIRECT                           | GO:0003779~actin binding | 16           | 3.595505618 | 0.00856<br>673  | 387               | 338             | 17446            | 2.13396939             | 0.9944646<br>25   | 0.20223320<br>2  | 11.942902       |

| <b>Annotation Cluster 12</b>                |                                                         |              |             |               |                   |                 |                  |                        |                   |                  |                 |
|---------------------------------------------|---------------------------------------------------------|--------------|-------------|---------------|-------------------|-----------------|------------------|------------------------|-------------------|------------------|-----------------|
| <b>Enrichment Score: 2.7599353017136075</b> |                                                         |              |             |               |                   |                 |                  |                        |                   |                  |                 |
| <b>Category</b>                             | <b>Term</b>                                             | <b>Count</b> | <b>%</b>    | <b>PValue</b> | <b>List Total</b> | <b>Pop Hits</b> | <b>Pop Total</b> | <b>Fold Enrichment</b> | <b>Bonferroni</b> | <b>Benjamini</b> | <b>FDR</b>      |
| GOTERM_BP_DIRECT                            | GO:0006935~chemotaxis                                   | 16           | 3.595505618 | 6.13E-08      | 406               | 118             | 18082            | 6.038907907            | 1.30E-04          | 2.61E-05         | 1.06E-04        |
| UP_KEYWORDS                                 | Chemotaxis                                              | 13           | 2.921348315 | 3.06E-07      | 445               | 94              | 22680            | 7.048529763            | 8.69E-05          | 6.69E-06         | 4.06E-04        |
| GOTERM_BP_DIRECT                            | GO:0006955~immune response                              | 19           | 4.269662921 | 4.47E-05      | 406               | 272             | 18082            | 3.111036656            | 0.0907728<br>91   | 0.00632394<br>4  | 0.07737972<br>6 |
| GOTERM_BP_DIRECT                            | GO:0006954~inflammatory response                        | 21           | 4.719101124 | 1.05E-04      | 406               | 344             | 18082            | 2.71882518             | 0.2001938<br>49   | 0.01233363<br>7  | 0.18155171<br>3 |
| GOTERM_BP_DIRECT                            | GO:0002548~monocyte chemotaxis                          | 7            | 1.573033708 | 2.45E-04      | 406               | 40              | 18082            | 7.793965517            | 0.4065589<br>53   | 0.02065636<br>9  | 0.42358081<br>3 |
| GOTERM_BP_DIRECT                            | GO:0050729~positive regulation of inflammatory response | 8            | 1.797752809 | 5.04E-04      | 406               | 63              | 18082            | 5.655485183            | 0.6584624<br>22   | 0.03517632<br>9  | 0.87009657<br>5 |
| INTERPRO                                    | IPR001811:Chemokine interleukin-8-like domain           | 7            | 1.573033708 | 6.06E-04      | 434               | 50              | 20594            | 6.643225806            | 0.3772948<br>49   |                  | 0.92375745<br>8 |
| GOTERM_MF_DIRECT                            | GO:0008009~chemokine activity                           | 7            | 1.573033708 | 6.32E-04      | 387               | 48              | 17446            | 6.57418174             | 0.3172062<br>02   | 0.02038425       | 0.92951268<br>7 |

**Table S1B: Go term analysis of genes expressed in the whole muscle but not in the myofiber**

|                  |                                                       |    |             |         |      |     |     |       |             |            |            |            |
|------------------|-------------------------------------------------------|----|-------------|---------|------|-----|-----|-------|-------------|------------|------------|------------|
| GOTERM_BP_DIRECT | GO:0070098~chemokine-mediated signaling pathway       | 7  | 1.573033708 | 0.00139 | 617  | 406 | 55  | 18082 | 5.668338558 | 0.9489282  | 0.08376828 | 2.39063289 |
| GOTERM_BP_DIRECT | GO:0060326~cell chemotaxis                            | 8  | 1.797752809 | 0.00180 | 9273 | 406 | 78  | 18082 | 4.567891878 | 0.9788355  | 0.10155998 | 3.08759040 |
| GOTERM_BP_DIRECT | GO:0071356~cellular response to tumor necrosis factor | 9  | 2.02247191  | 0.00332 | 2008 | 406 | 110 | 18082 | 3.64393193  | 0.9991618  | 0.15521616 | 5.59994912 |
| GOTERM_BP_DIRECT | GO:0071346~cellular response to interferon-gamma      | 7  | 1.573033708 | 0.00413 | 4874 | 406 | 68  | 18082 | 4.584685598 | 0.9998524  | 0.17450286 | 6.92448349 |
| GOTERM_BP_DIRECT | GO:0030593~neutrophil chemotaxis                      | 7  | 1.573033708 | 0.00444 | 5132 | 406 | 69  | 18082 | 4.51824088  | 0.999924   | 0.17930164 | 7.42540543 |
| GOTERM_BP_DIRECT | GO:0043547~positive regulation of GTPase activity     | 10 | 2.247191011 | 0.00567 | 7978 | 406 | 146 | 18082 | 3.050475741 | 0.9999945  | 0.20795099 | 9.39088067 |
| INTERPRO         | IPR000827:CC chemokine, conserved site                | 4  | 0.898876404 | 0.00595 | 5204 | 434 | 18  | 20594 | 10.54480287 | 0.9905799  | 0.13182430 | 8.73440632 |
| SMART            | SM00199:SCY                                           | 6  | 1.348314607 | 0.00912 | 3653 | 282 | 48  | 10425 | 4.621010638 | 0.8165150  |            | 10.7217826 |
| UP_KEYWORDS      | Cytokine                                              | 10 | 2.247191011 | 0.01740 | 2177 | 445 | 200 | 22680 | 2.548314607 | 0.9931651  | 0.11193271 | 20.7554336 |
| GOTERM_MF_DIRECT | GO:0048020~CCR chemokine receptor binding             | 4  | 0.898876404 | 0.02337 | 9318 | 387 | 28  | 17446 | 6.440014766 | 0.9999993  | 0.36015218 | 29.5109613 |
| GOTERM_BP_DIRECT | GO:0048247~lymphocyte chemotaxis                      | 4  | 0.898876404 | 0.03705 | 5414 | 406 | 33  | 18082 | 5.398417674 | 0.9999993  | 0.36015218 | 29.5109613 |
| GOTERM_MF_DIRECT | GO:0005125~cytokine activity                          | 10 | 2.247191011 | 0.04905 | 7582 | 387 | 214 | 17446 | 2.106546886 | 0.9999999  | 0.52349545 | 72.0755826 |
| KEGG_PATHWAY     | mmu04062:Chemokine signaling pathway                  | 9  | 2.02247191  | 0.09707 | 4137 | 185 | 196 | 7691  | 1.908963045 | 0.9999999  | 0.52349545 | 72.0755826 |
| GOTERM_BP_DIRECT | GO:0071347~cellular response to interleukin-1         | 5  | 1.123595506 | 0.10476 | 3395 | 406 | 80  | 18082 | 2.783559113 | 0.82992364 |            | 85.2895264 |
| KEGG_PATHWAY     | mmu04060:Cytokine-cytokine receptor interaction       | 9  | 2.02247191  | 0.22298 | 4253 | 185 | 242 | 7691  | 1.546102301 | 0.70063495 |            | 95.7224470 |

**Table S1B: Go term analysis of genes expressed in the whole muscle but not in the myofiber**

| Annotation Cluster<br>13 |                                            | Enrichment Score: 2.74686435865684 |             |          |               |             |              |                    |            |            |            |
|--------------------------|--------------------------------------------|------------------------------------|-------------|----------|---------------|-------------|--------------|--------------------|------------|------------|------------|
| Category                 | Term                                       | Count                              | %           | PValue   | List<br>Total | Pop<br>Hits | Pop<br>Total | Fold<br>Enrichment | Bonferroni | Benjamini  | FDR        |
| GOTERM_CC_DIRECT         | GO:0031838~haptoglobin-hemoglobin complex  | 5                                  | 1.123595506 | 1.11E-06 | 431           | 5           | 19662        | 45.61948956        | 3.38E-04   | 3.76E-05   | 0.00148521 |
| GOTERM_MF_DIRECT         | GO:0031720~haptoglobin binding             | 4                                  | 0.898876404 | 4.23E-05 | 387           | 4           | 17446        | 45.08010336        | 0.0252189  | 0.00509544 | 0.06249442 |
| GOTERM_BP_DIRECT         | GO:0098869~cellular oxidant detoxification | 4                                  | 0.898876404 | 1.08E-04 | 406           | 5           | 18082        | 35.62955665        | 0.2051913  | 0.01141701 | 0.18664110 |
| UP_KEYWORDS              | Oxygen transport                           | 5                                  | 1.123595506 | 2.19E-04 | 445           | 16          | 22680        | 15.92696629        | 0.0602496  | 0.00310222 | 0.28952662 |
| INTERPRO                 | IPR000971:Globin                           | 5                                  | 1.123595506 | 2.87E-04 | 434           | 16          | 20594        | 14.82862903        | 0.2008276  | 0.01061839 | 0.43825365 |
| INTERPRO                 | IPR009050:Globin-like                      | 5                                  | 1.123595506 | 2.87E-04 | 434           | 16          | 20594        | 14.82862903        | 83         | 8          | 9          |
| GOTERM_MF_DIRECT         | GO:0005344~oxygen transporter activity     | 5                                  | 1.123595506 | 3.48E-04 | 387           | 16          | 17446        | 14.0875323         | 0.2008276  | 0.01061839 | 0.43825365 |
| INTERPRO                 | IPR012292:Globin, structural domain        | 5                                  | 1.123595506 | 3.69E-04 | 434           | 17          | 20594        | 13.95635674        | 0.1894740  | 0.02591722 | 0.51282383 |
| GOTERM_MF_DIRECT         | GO:0004601~peroxidase activity             | 6                                  | 1.348314607 | 5.46E-04 | 387           | 31          | 17446        | 8.725181295        | 94         | 8          | 8          |
| KEGG_PATHWAY             | mmu05144:Malaria                           | 7                                  | 1.573033708 | 9.20E-04 | 185           | 48          | 7691         | 6.062725225        | 0.2504798  | 0.01302004 | 0.56329576 |
| UP_KEYWORDS              | Heme                                       | 11                                 | 2.471910112 | 0.00205  | 445           | 171         | 22680        | 3.278533412        | 64         | 6          | 2          |
| GOTERM_MF_DIRECT         | GO:0019825~oxygen binding                  | 5                                  | 1.123595506 | 0.00239  | 387           | 26          | 17446        | 8.669250646        | 0.2811456  | 0.02956297 | 0.80464405 |
| GOTERM_CC_DIRECT         | GO:0005833~hemoglobin complex              | 4                                  | 0.898876404 | 0.00252  | 431           | 13          | 19662        | 14.03676602        | 3          | 9          | 6          |
| UP_KEYWORDS              | Iron                                       | 16                                 | 3.595505618 | 0.00739  | 445           | 375         | 22680        | 2.174561798        | 0.1650524  | 0.02229597 | 1.14314780 |
| KEGG_PATHWAY             | mmu05143:African trypanosomiasis           | 5                                  | 1.123595506 | 0.00930  | 185           | 35          | 7691         | 5.938996139        | 06         | 7          | 4          |
| GOTERM_MF_DIRECT         | GO:0020037~heme binding                    | 10                                 | 2.247191011 | 0.01608  | 387           | 175         | 17446        | 2.576005906        | 0.4426008  | 0.02141455 | 2.69027262 |
| GOTERM_BP_DIRECT         | GO:0015671~oxygen transport                | 3                                  | 0.674157303 | 0.01999  | 406           | 10          | 18082        | 13.36108374        | 17         | 3          | 6          |
|                          |                                            |                                    |             |          |               |             |              |                    | 0.7655617  | 0.07742521 | 3.48791847 |
|                          |                                            |                                    |             |          |               |             |              |                    | 59         | 5          | 4          |
|                          |                                            |                                    |             |          |               |             |              |                    | 0.5372282  | 0.03974245 | 3.32777706 |
|                          |                                            |                                    |             |          |               |             |              |                    | 41         | 4          | 3          |
|                          |                                            |                                    |             |          |               |             |              |                    | 0.8786338  | 0.06014318 | 9.37156532 |
|                          |                                            |                                    |             |          |               |             |              |                    | 55         | 9          | 9          |
|                          |                                            |                                    |             |          |               |             |              |                    | 0.8398920  | 0.12265107 | 11.0201842 |
|                          |                                            |                                    |             |          |               |             |              |                    | 49         | 1          | 3          |
|                          |                                            |                                    |             |          |               |             |              |                    | 0.9999443  | 0.27860457 |            |
|                          |                                            |                                    |             |          |               |             |              |                    | 84         | 9          | 21.3198102 |
|                          |                                            |                                    |             |          |               |             |              |                    |            | 0.42378206 | 29.5158342 |
|                          |                                            |                                    |             |          |               |             |              |                    | 1          | 8          | 1          |

**Table S1B: Go term analysis of genes expressed in the whole muscle but not in the myofiber**

|                  |                                                    |    |             |         |      |     |     |       |             |   |            |            |
|------------------|----------------------------------------------------|----|-------------|---------|------|-----|-----|-------|-------------|---|------------|------------|
| GOTERM_BP_DIRECT | GO:0048821~erythrocyte development                 | 4  | 0.898876404 | 0.02190 | 7162 | 406 | 27  | 18082 | 6.598066046 | 1 | 0.44133628 | 31.8610158 |
| UP_SEQ_FEATURE   | metal ion-binding site:Iron (heme distal ligand)   | 3  | 0.674157303 | 0.02380 | 8953 | 402 | 11  | 18012 | 12.21981004 | 1 | 0.55263466 | 32.7738118 |
| UP_SEQ_FEATURE   | metal ion-binding site:Iron (heme proximal ligand) | 3  | 0.674157303 | 0.03770 | 4697 | 402 | 14  | 18012 | 9.601279318 | 1 | 0.66702250 | 46.9201988 |
| GOTERM_MF_DIRECT | GO:0005506~iron ion binding                        | 10 | 2.247191011 | 0.04671 | 7823 | 387 | 212 | 17446 | 2.12641997  | 1 | 0.54206420 | 50.7010330 |
| UP_SEQ_FEATURE   | metal ion-binding site:Iron (heme axial ligand)    | 5  | 1.123595506 | 0.24909 | 948  | 402 | 114 | 18012 | 1.965174129 | 1 | 0.99339942 | 99.1094602 |

| Annotation Cluster 14                |                                                                       |       |             |          |            |          |           |                 |            |            |            |
|--------------------------------------|-----------------------------------------------------------------------|-------|-------------|----------|------------|----------|-----------|-----------------|------------|------------|------------|
| Enrichment Score: 2.5444970918259306 |                                                                       |       |             |          |            |          |           |                 |            |            |            |
| Category                             | Term                                                                  | Count | %           | PValue   | List Total | Pop Hits | Pop Total | Fold Enrichment | Bonferroni | Benjamini  | FDR        |
| INTERPRO                             | IPRO20635:Tyrosine-protein kinase, catalytic domain                   | 12    | 2.696629213 | 1.01E-06 | 434        | 81       | 20594     | 7.029868578     | 7.89E-04   | 8.77E-05   | 0.00154643 |
| UP_KEYWORDS                          | Immunoglobulin domain                                                 | 28    | 6.292134831 | 1.12E-06 | 445        | 481      | 22680     | 2.966852765     | 3.18E-04   | 2.12E-05   | 0.00148236 |
| UP_SEQ_FEATURE                       | domain:Ig-like C2-type 1                                              | 15    | 3.370786517 | 1.48E-06 | 402        | 132      | 18012     | 5.091587517     | 0.0020725  | 2.96E-04   | 0.00243868 |
| UP_SEQ_FEATURE                       | domain:Ig-like C2-type 2                                              | 15    | 3.370786517 | 1.62E-06 | 402        | 133      | 18012     | 5.053304904     | 0.0022700  | 2.84E-04   | 0.00267123 |
| INTERPRO                             | IPRO16243:Tyrosine-protein kinase, CSF-1/PDGF receptor                | 5     | 1.123595506 | 6.42E-06 | 434        | 7        | 20594     | 33.89400922     | 0.0049983  | 4.17E-04   | 0.00981702 |
| INTERPRO                             | IPRO08266:Tyrosine-protein kinase, active site                        | 12    | 2.696629213 | 7.49E-06 | 434        | 99       | 20594     | 5.751710655     | 0.0058316  | 4.50E-04   | 0.01145825 |
| SMART                                | SM00219:TyrKc                                                         | 12    | 2.696629213 | 1.02E-05 | 282        | 81       | 10425     | 5.476753349     | 0.0018827  | 4.71E-04   | 0.01260407 |
| INTERPRO                             | IPRO01824:Tyrosine-protein kinase, receptor class III, conserved site | 5     | 1.123595506 | 1.26E-05 | 434        | 8        | 20594     | 29.65725806     | 0.0098067  | 6.57E-04   | 0.01930657 |
| UP_KEYWORDS                          | Tyrosine-protein kinase                                               | 12    | 2.696629213 | 1.39E-05 | 445        | 113      | 22680     | 5.412349607     | 0.0039281  | 2.19E-04   | 0.01836304 |
| GOTERM_BP_DIRECT                     | GO:0007169~transmembrane receptor protein                             | 12    | 2.696629213 | 1.47E-05 | 406        | 100      | 18082     | 5.344433498     | 0.0308998  | 0.00313380 | 0.02552920 |

**Table S1B: Go term analysis of genes expressed in the whole muscle but not in the myofiber**

|                  |                                                                           |    |             |           |     |      |       |             |             |             |             |
|------------------|---------------------------------------------------------------------------|----|-------------|-----------|-----|------|-------|-------------|-------------|-------------|-------------|
| INTERPRO         | tyrosine kinase signaling pathway<br>IPR003598:Immunoglobulin subtype 2   | 18 | 4.04494382  | 1.57E-05  | 434 | 242  | 20594 | 3.529458811 | 0.012212507 | 7.68E-04    | 0.024071474 |
| PIR_SUPERFAMILY  | PIRSF000615:tyrosine-protein kinase, CSF-1/PDGF receptor type             | 5  | 1.123595506 | 2.34E-05  | 55  | 7    | 1807  | 23.46753247 | 0.001097919 | 0.001097919 | 0.022197505 |
| INTERPRO         | IPR001245:Serine-threonine/tyrosine-protein kinase catalytic domain       | 13 | 2.921348315 | 3.85E-05  | 434 | 139  | 20594 | 4.437920631 | 0.029620914 | 0.0015813   | 0.058893597 |
| GOTERM_MF_DIRECT | GO:0004713~protein tyrosine kinase activity                               | 12 | 2.696629213 | 7.82E-05  | 387 | 121  | 17446 | 4.470754052 | 0.046111833 | 0.007837267 | 0.115475142 |
| GOTERM_BP_DIRECT | GO:0018108~peptidyl-tyrosine phosphorylation                              | 9  | 2.02247191  | 9.77E-05  | 406 | 65   | 18082 | 6.166654036 | 0.187868718 | 0.012166167 | 0.169133509 |
| GOTERM_MF_DIRECT | GO:0004714~transmembrane receptor protein tyrosine kinase activity        | 8  | 1.797752809 | 1.78E-04  | 387 | 54   | 17446 | 6.678533831 | 0.101809527 | 0.015221970 | 0.262446633 |
| UP_SEQ_FEATURE   | domain:Ig-like C2-type 4                                                  | 8  | 1.797752809 | 2.33E-04  | 402 | 56   | 18012 | 6.400852878 | 0.278732821 | 0.020214494 | 0.383330671 |
| INTERPRO         | IPR013783:Immunoglobulin-like fold                                        | 42 | 9.438202247 | 2.79E-04  | 434 | 1099 | 20594 | 1.813437436 | 0.195967893 | 0.010846551 | 0.426426978 |
| SMART            | SM00408:IGc2                                                              | 18 | 4.04494382  | 2.93E-04  | 282 | 242  | 10425 | 2.749692281 | 0.052822013 | 0.009003929 | 0.362318228 |
| GOTERM_MF_DIRECT | GO:0005021~vascular endothelial growth factor-activated receptor activity | 4  | 0.898876404 | 3.52E-04  | 387 | 7    | 17446 | 25.76005906 | 0.191593954 | 0.023355256 | 0.519200275 |
| UP_SEQ_FEATURE   | domain:Ig-like C2-type 5                                                  | 7  | 1.573033708 | 6.53E-04  | 402 | 48   | 18012 | 6.53420398  | 0.599755145 | 0.044751668 | 1.070546511 |
| INTERPRO         | IPR003599:Immunoglobulin subtype                                          | 24 | 5.393258427 | 6.67E-04  | 434 | 518  | 20594 | 2.198530328 | 0.406277196 | 0.021488377 | 1.016229564 |
| UP_SEQ_FEATURE   | domain:Ig-like C2-type 3                                                  | 8  | 1.797752809 | 7765E-05  | 402 | 88   | 18012 | 4.073270014 | 0.992435773 | 0.155005368 | 5.579494556 |
| INTERPRO         | IPR007110:Immunoglobulin-like domain                                      | 32 | 7.191011236 | 8957E-05  | 434 | 920  | 20594 | 1.650490884 | 0.99561844  | 0.147614329 | 10.09286288 |
| GOTERM_BP_DIRECT | GO:0046777~protein autophosphorylation                                    | 11 | 2.471910112 | 0.0083732 | 406 | 183  | 18082 | 2.677084175 | 0.999999983 | 0.257965788 | 13.5516713  |



**Table S1B: Go term analysis of genes expressed in the whole muscle but not in the myofiber**

|                  |                                                                           |    |             |                 |     |      |       |             |                 |                 |                 |
|------------------|---------------------------------------------------------------------------|----|-------------|-----------------|-----|------|-------|-------------|-----------------|-----------------|-----------------|
| INTERPRO         | IPR013098:Immunoglobulin I-set                                            | 9  | 2.02247191  | 0.01267<br>2488 | 434 | 147  | 20594 | 2.90520079  | 0.9999527<br>69 | 0.22539060<br>5 | 17.7287062<br>2 |
| SMART            | SM00409:IG                                                                | 24 | 5.393258427 | 0.01272<br>5625 | 282 | 518  | 10425 | 1.712807032 | 0.9064583<br>52 | 0.17917529<br>8 | 14.6555845<br>6 |
| GOTERM_BP_DIRECT | GO:0010863~positive regulation of phospholipase C activity                | 3  | 0.674157303 | 0.01281<br>4319 | 406 | 8    | 18082 | 16.70135468 | 1               | 0.33221832<br>5 | 20.0174172<br>2 |
| GOTERM_BP_DIRECT | GO:0014068~positive regulation of phosphatidylinositol 3-kinase signaling | 6  | 1.348314607 | 0.01423<br>1808 | 406 | 64   | 18082 | 4.17533867  | 1               | 0.34547789<br>7 | 21.9832665<br>9 |
| UP_KEYWORDS      | Proto-oncogene                                                            | 7  | 1.573033708 | 0.01584<br>5223 | 445 | 103  | 22680 | 3.463728592 | 0.9892846<br>34 | 0.10473544<br>5 | 19.0752858<br>5 |
| INTERPRO         | IPR017441:Protein kinase, ATP binding site                                | 16 | 3.595505618 | 0.02028<br>3216 | 434 | 394  | 20594 | 1.926969052 | 0.9999998<br>88 | 0.29927910<br>7 | 26.9156280<br>3 |
| UP_KEYWORDS      | Kinase                                                                    | 23 | 5.168539326 | 0.02280<br>7965 | 445 | 707  | 22680 | 1.658026477 | 0.9985734<br>18 | 0.12760228<br>8 | 26.3418165<br>9 |
| UP_SEQ_FEATURE   | domain:Ig-like C2-type 6                                                  | 4  | 0.898876404 | 0.03105<br>5605 | 402 | 31   | 18012 | 5.781415503 | 1               | 0.60979057<br>8 | 40.5418747<br>2 |
| GOTERM_BP_DIRECT | GO:0043552~positive regulation of phosphatidylinositol 3-kinase activity  | 4  | 0.898876404 | 0.03153<br>7882 | 406 | 31   | 18082 | 5.746702686 | 1               | 0.52364131<br>9 | 42.5923661<br>1 |
| GOTERM_BP_DIRECT | GO:0048015~phosphatidylinositol-mediated signaling                        | 4  | 0.898876404 | 0.04619<br>0694 | 406 | 36   | 18082 | 4.948549535 | 1               | 0.60975033<br>9 | 55.9139453<br>5 |
| UP_SEQ_FEATURE   | active site:Proton acceptor                                               | 24 | 5.393258427 | 0.04789<br>8298 | 402 | 710  | 18012 | 1.514568005 | 1               | 0.73376196<br>6 | 55.4640275<br>1 |
| UP_SEQ_FEATURE   | domain:Ig-like C2-type 7                                                  | 3  | 0.674157303 | 0.04829<br>6378 | 402 | 16   | 18012 | 8.401119403 | 1               | 0.73003360<br>6 | 55.7698991<br>1 |
| KEGG_PATHWAY     | mmu04015:Rap1 signaling pathway                                           | 10 | 2.247191011 | 0.07007<br>2871 | 185 | 214  | 7691  | 1.942662288 | 0.9999993<br>45 | 0.44749930<br>4 | 59.6495525<br>3 |
| GOTERM_MF_DIRECT | GO:0016301~kinase activity                                                | 22 | 4.943820225 | 0.07418<br>2957 | 387 | 674  | 17446 | 1.47145738  | 1               | 0.66131541<br>4 | 67.9998120<br>1 |
| UP_KEYWORDS      | Nucleotide-binding                                                        | 44 | 9.887640449 | 0.07540<br>2972 | 445 | 1754 | 22680 | 1.27851588  | 1               | 0.29771078<br>1 | 64.6143930<br>8 |
| INTERPRO         | IPR000719:Protein kinase, catalytic domain                                | 16 | 3.595505618 | 0.12871<br>8699 | 434 | 515  | 20594 | 1.474224867 | 1               | 0.76185064<br>7 | 87.8568828<br>1 |

**Table S1B: Go term analysis of genes expressed in the whole muscle but not in the myofiber**

|                  |                           |    |             |         |      |     |      |       |             |   |            |            |
|------------------|---------------------------|----|-------------|---------|------|-----|------|-------|-------------|---|------------|------------|
| UP_KEYWORDS      | Transferase               | 40 | 8.988764045 | 0.13227 | 0956 | 445 | 1654 | 22680 | 1.232558455 | 1 | 5          | 84.7415522 |
|                  | GO:0004672~protein        |    |             | 0.13425 |      |     |      |       |             |   | 8          |            |
| GOTERM_MF_DIRECT | kinase activity           | 17 | 3.820224719 | 0.14588 | 6619 | 387 | 531  | 17446 | 1.44324248  | 1 | 6          | 88.1301653 |
|                  | GO:0016310~phosphoryla    |    |             | 0.14588 |      |     |      |       |             |   | 9          |            |
| GOTERM_BP_DIRECT | tion                      | 19 | 4.269662921 | 0.19585 | 6945 | 406 | 612  | 18082 | 1.382682958 | 1 | 1          | 93.4846704 |
|                  | IPR011009:Protein kinase- |    |             | 0.19585 |      |     |      |       |             |   | 1          |            |
| INTERPRO         | like domain               | 16 | 3.595505618 | 0.22332 | 2272 | 434 | 556  | 20594 | 1.36551404  | 1 | 6          | 96.4396651 |
|                  | GO:0006468~protein        |    |             | 0.22332 |      |     |      |       |             |   | 3          |            |
| GOTERM_BP_DIRECT | phosphorylation           | 17 | 3.820224719 | 0.23520 | 1264 | 406 | 576  | 18082 | 1.31445847  | 1 | 4          | 98.7436052 |
|                  |                           |    |             | 0.23520 |      |     |      |       |             |   | 3          |            |
| UP_SEQ_FEATURE   | domain:Protein kinase     | 15 | 3.370786517 | 0.30858 | 8356 | 402 | 502  | 18012 | 1.338823809 | 1 | 3          | 98.7954007 |
|                  | mmu04014:Ras signaling    |    |             | 0.30858 |      |     |      |       |             |   | 7          |            |
| KEGG_PATHWAY     | pathway                   | 8  | 1.797752809 | 0.32027 | 1523 | 185 | 229  | 7691  | 1.452330934 | 1 | 1          | 99.0046737 |
|                  |                           |    |             | 0.32027 |      |     |      |       |             |   | 2          |            |
| UP_SEQ_FEATURE   | binding site:ATP          | 16 | 3.595505618 | 0.34735 | 5863 | 402 | 583  | 18012 | 1.229666419 | 1 | 0.99840943 | 99.8274490 |
|                  |                           |    |             | 0.34735 |      |     |      |       |             |   | 9          |            |
| UP_KEYWORDS      | ATP-binding               | 30 | 6.741573034 | 0.41835 | 8386 | 445 | 1363 | 22680 | 1.121781925 | 1 | 2          | 99.6498922 |
|                  | GO:0016740~transferase    |    |             | 0.41835 |      |     |      |       |             |   | 6          |            |
| GOTERM_MF_DIRECT | activity                  | 35 | 7.865168539 | 0.55198 | 3078 | 387 | 1472 | 17446 | 1.071877458 | 1 | 9          | 99.9668077 |
|                  |                           |    |             | 0.55198 |      |     |      |       |             |   | 1          |            |
| GOTERM_MF_DIRECT | GO:0005524~ATP binding    | 34 | 7.640449438 | 0.64245 | 0818 | 387 | 1507 | 17446 | 1.017069352 | 1 | 4          | 99.9992997 |
|                  | GO:0000166~nucleotide     |    |             | 0.64245 |      |     |      |       |             |   | 8          |            |
| GOTERM_MF_DIRECT | binding                   | 42 | 9.438202247 | 0.65870 | 2402 | 387 | 1936 | 17446 | 0.977977449 | 1 | 8          | 99.9999750 |
|                  | nucleotide phosphate-     |    |             | 0.65870 |      |     |      |       |             |   | 5          |            |
| UP_SEQ_FEATURE   | binding region:ATP        | 21 | 4.719101124 |         | 256  | 402 | 963  | 18012 | 0.977077231 | 1 | 7          | 99.9999979 |
|                  |                           |    |             |         |      |     |      |       |             |   | 8          |            |

| Annotation Cluster 15                |                          |       |             |          |            |          |           |                 |            |            |            |
|--------------------------------------|--------------------------|-------|-------------|----------|------------|----------|-----------|-----------------|------------|------------|------------|
| Enrichment Score: 2.5365441682276826 |                          |       |             |          |            |          |           |                 |            |            |            |
| Category                             | Term                     | Count | %           | PValue   | List Total | Pop Hits | Pop Total | Fold Enrichment | Bonferroni | Benjamini  | FDR        |
| UP_SEQ_FEATURE                       | domain:TSP N-terminal    | 5     | 1.123595506 | 7.19E-04 | 402        | 19       | 18012     | 11.79104478     | 0.6354354  | 0.04691394 | 1.17906540 |
|                                      |                          |       |             | 0.00257  |            |          |           |                 | 39         | 2          | 5          |
| SMART                                | SM00210:TSPN             | 5     | 1.123595506 | 5579     | 282        | 22       | 10425     | 8.401837524     | 0.3794175  | 0.05163018 | 3.14071000 |
|                                      | IPR013320:Concanavalin   |       |             |          |            |          |           |                 |            | 6          | 7          |
|                                      | A-like lectin/gluconase, |       |             | 0.00522  |            |          |           |                 |            |            |            |
| INTERPRO                             | subgroup                 | 12    | 2.696629213 | 3947     | 434        | 211      | 20594     | 2.698669928     | 0.9832707  |            | 7.70166107 |
|                                      |                          |       |             |          |            |          |           |                 | 44         | 0.11999803 | 2          |

**Table S1B: Go term analysis of genes expressed in the whole muscle but not in the myofiber**

| INTERPRO                                    | IPR001791:Laminin G domain  | 6     | 1.348314607 | 0.00737  | 8033       | 434      | 58        | 20594           | 4.908787542 | 0.9969224 | 0.14841480 | 10.7129689 |
|---------------------------------------------|-----------------------------|-------|-------------|----------|------------|----------|-----------|-----------------|-------------|-----------|------------|------------|
|                                             |                             |       |             |          |            |          |           |                 |             | 03        | 1          | 3          |
| <b>Annotation Cluster 16</b>                |                             |       |             |          |            |          |           |                 |             |           |            |            |
| <b>Enrichment Score: 2.359676200880176</b>  |                             |       |             |          |            |          |           |                 |             |           |            |            |
| Category                                    | Term                        | Count | %           | PValue   | List Total | Pop Hits | Pop Total | Fold Enrichment | Bonferroni  | Benjamini | FDR        |            |
| INTERPRO                                    | IPR000859:CUB domain        | 7     | 1.573033708 | 0.00111  | 4517       | 434      | 56        | 20594           | 5.931451613 | 0.5814350 | 0.03174172 | 1.69186007 |
|                                             |                             |       |             |          |            |          |           |                 |             | 1         | 2          | 5          |
| SMART                                       | SM00042:CUB                 | 7     | 1.573033708 | 0.00236  | 4072       | 282      | 51        | 10425           | 5.074050897 | 0.3545909 | 0.05326293 | 2.88625281 |
|                                             |                             |       |             |          |            |          |           |                 |             | 83        | 9          | 2          |
| UP_SEQ_FEATURE                              | domain:CUB 2                | 5     | 1.123595506 | 0.01175  | 6389       | 402      | 40        | 18012           | 5.600746269 | 0.9999999 | 0.37731683 | 17.7073114 |
|                                             |                             |       |             |          |            |          |           |                 |             | 37        | 8          | 1          |
| UP_SEQ_FEATURE                              | domain:CUB 1                | 5     | 1.123595506 | 0.01175  | 6389       | 402      | 40        | 18012           | 5.600746269 | 0.9999999 | 0.37731683 | 17.7073114 |
|                                             |                             |       |             |          |            |          |           |                 |             | 37        | 8          | 1          |
| <b>Annotation Cluster 17</b>                |                             |       |             |          |            |          |           |                 |             |           |            |            |
| <b>Enrichment Score: 2.3565711912640457</b> |                             |       |             |          |            |          |           |                 |             |           |            |            |
| Category                                    | Term                        | Count | %           | PValue   | List Total | Pop Hits | Pop Total | Fold Enrichment | Bonferroni  | Benjamini | FDR        |            |
| UP_SEQ_FEATURE                              | domain:EGF-like 1           | 13    | 2.921348315 | 6.81E-06 | 402        | 111      | 18012     | 5.247546054     | 0.0095082   | 56        | 7.96E-04   | 0.01122915 |
|                                             |                             |       |             |          |            |          |           |                 |             |           |            | 2.20751715 |
| UP_SEQ_FEATURE                              | domain:EGF-like 4           | 7     | 1.573033708 | 0.00135  | 3639       | 402      | 55        | 18012           | 5.702578019 | 0.8502947 | 0.07607892 | 3          |
|                                             |                             |       |             |          |            |          |           |                 |             |           |            | 3.42610855 |
| UP_SEQ_FEATURE                              | domain:EGF-like 7           | 5     | 1.123595506 | 0.00211  | 3219       | 402      | 25        | 18012           | 8.96119403  | 0.9484842 | 0.10780613 | 3          |
|                                             |                             |       |             |          |            |          |           |                 |             | 5         | 7          | 3          |
| UP_SEQ_FEATURE                              | domain:EGF-like 8           | 5     | 1.123595506 | 0.00245  | 4072       | 402      | 26        | 18012           | 8.616532721 | 0.9680900 |            | 3.96828839 |
|                                             |                             |       |             |          |            |          |           |                 |             | 52        | 0.11978279 | 5          |
| UP_SEQ_FEATURE                              | domain:EGF-like 2           | 8     | 1.797752809 | 0.00267  | 5735       | 402      | 84        | 18012           | 4.267235252 | 0.9766324 | 0.12554759 | 4.31934165 |
|                                             |                             |       |             |          |            |          |           |                 |             | 65        | 8          | 2          |
| INTERPRO                                    | IPR002049:EGF-like, laminin | 5     | 1.123595506 | 0.00735  | 7341       | 434      | 37        | 20594           | 6.412380122 | 0.9968718 | 0.15192035 | 10.6844841 |
|                                             |                             |       |             |          |            |          |           |                 |             | 88        | 8          | 9          |
| UP_SEQ_FEATURE                              | domain:EGF-like 6           | 5     | 1.123595506 | 0.00983  | 0372       | 402      | 38        | 18012           | 5.895522388 | 0.9999990 | 0.34276142 |            |
|                                             |                             |       |             |          |            |          |           |                 |             | 34        | 8          | 15.0240305 |
| UP_SEQ_FEATURE                              | domain:EGF-like 9           | 4     | 0.898876404 | 0.01393  | 6214       | 402      | 23        | 18012           | 7.792342635 | 0.9999999 | 0.41244398 | 20.6481122 |
|                                             |                             |       |             |          |            |          |           |                 |             | 97        | 5          | 6          |
| SMART                                       | SM00180:EGF_Lam             | 5     | 1.123595506 | 0.01402  | 4904       | 282      | 35        | 10425           | 5.281155015 | 0.9266838 | 0.15986967 | 16.0350033 |
|                                             |                             |       |             |          |            |          |           |                 |             | 09        | 8          | 7          |

**Table S1B: Go term analysis of genes expressed in the whole muscle but not in the myofiber**

| UP_SEQ_FEATURE                            | domain:EGF-like 5                                                                               | 5     | 1.123595506 | 0.01507<br>2945 | 402        | 43       | 18012     | 5.209996529     | 0.9999999<br>99 | 0.42898857<br>2 | 22.1422301<br>5 |
|-------------------------------------------|-------------------------------------------------------------------------------------------------|-------|-------------|-----------------|------------|----------|-----------|-----------------|-----------------|-----------------|-----------------|
| UP_SEQ_FEATURE                            | domain:EGF-like 3                                                                               | 6     | 1.348314607 | 0.01571<br>5322 | 402        | 66       | 18012     | 4.073270014     | 1               | 0.43415318<br>5 | 22.9748416<br>2 |
| UP_KEYWORDS                               | Laminin EGF-like domain                                                                         | 3     | 0.674157303 | 0.12276<br>8506 | 445        | 31       | 22680     | 4.932221819     | 1               | 0.39103477<br>2 | 82.3725282<br>8 |
| <b>Annotation Cluster 18</b>              |                                                                                                 |       |             |                 |            |          |           |                 |                 |                 |                 |
| <b>Enrichment Score: 2.12152079505643</b> |                                                                                                 |       |             |                 |            |          |           |                 |                 |                 |                 |
| Category                                  | Term                                                                                            | Count | %           | PValue          | List Total | Pop Hits | Pop Total | Fold Enrichment | Bonferroni      | Benjamini       | FDR             |
| GOTERM_BP_DIRECT                          | GO:0035924~cellular response to vascular endothelial growth factor stimulus                     | 6     | 1.348314607 | 1.06E-04        | 406        | 22       | 18082     | 12.14643977     | 0.2015652<br>87 | 0.01177757<br>3 | 0.18294522<br>6 |
| GOTERM_BP_DIRECT                          | GO:0030949~positive regulation of vascular endothelial growth factor receptor signaling pathway | 3     | 0.674157303 | 0.03812<br>3322 | 406        | 14       | 18082     | 9.543631246     | 1               | 0.56286868<br>7 | 48.9906028<br>6 |
| GOTERM_BP_DIRECT                          | GO:0048010~vascular endothelial growth factor receptor signaling pathway                        | 3     | 0.674157303 | 0.10716<br>8216 | 406        | 25       | 18082     | 5.344433498     | 1               | 0.83487031<br>9 | 85.9590931<br>1 |
| <b>Annotation Cluster 19</b>              |                                                                                                 |       |             |                 |            |          |           |                 |                 |                 |                 |
| <b>Enrichment Score: 2.08042287004266</b> |                                                                                                 |       |             |                 |            |          |           |                 |                 |                 |                 |
| Category                                  | Term                                                                                            | Count | %           | PValue          | List Total | Pop Hits | Pop Total | Fold Enrichment | Bonferroni      | Benjamini       | FDR             |
| UP_KEYWORDS                               | Developmental protein                                                                           | 37    | 8.314606742 | 2.20E-04        | 445        | 976      | 22680     | 1.93212378      | 0.0605575<br>18 | 0.00297027<br>9 | 0.29105117<br>8 |
| GOTERM_BP_DIRECT                          | GO:0007275~multicellular organism development                                                   | 36    | 8.08988764  | 0.00940<br>1255 | 406        | 1029     | 18082     | 1.558143877     | 0.9999999<br>98 | 0.27700577<br>1 | 15.0907808<br>7 |
| UP_KEYWORDS                               | Differentiation                                                                                 | 16    | 3.595505618 | 0.27749<br>1255 | 445        | 646      | 22680     | 1.262323025     | 1               | 0.62543604<br>1 | 98.6526226<br>8 |

**Table S1B: Go term analysis of genes expressed in the whole muscle but not in the myofiber**

| Annotation Cluster 20 |                                                         | Enrichment Score: 1.9740279921456423 |             |          |            |          |           |                 |            |            |            |
|-----------------------|---------------------------------------------------------|--------------------------------------|-------------|----------|------------|----------|-----------|-----------------|------------|------------|------------|
| Category              | Term                                                    | Count                                | %           | PValue   | List Total | Pop Hits | Pop Total | Fold Enrichment | Bonferroni | Benjamini  | FDR        |
| UP_KEYWORDS           | Zymogen                                                 | 14                                   | 3.146067416 | 3.11E-04 | 445        | 213      | 22680     | 3.349897136     | 0.0845638  | 0.00400806 | 0.41140976 |
| UP_SEQ_FEATURE        | propeptide:Activation peptide                           | 9                                    | 2.02247191  | 4.38E-04 | 402        | 81       | 18012     | 4.978441128     | 95         | 9          | 2          |
| GOTERM_MF_DIRECT      | GO:0004252~serine-type endopeptidase activity           | 14                                   | 3.146067416 | 9.12E-04 | 387        | 212      | 17446     | 2.976987958     | 0.4592876  | 0.03552242 | 0.72012981 |
| UP_KEYWORDS           | Protease                                                | 23                                   | 5.168539326 | 0.00112  | 445        | 542      | 22680     | 2.162776235     | 0.4235584  | 0.04149019 |            |
| GOTERM_BP_DIRECT      | GO:0006508~proteolysis                                  | 25                                   | 5.617977528 | 0.00315  | 406        | 582      | 18082     | 1.913099047     | 56         | 6          | 1.33921312 |
| UP_SEQ_FEATURE        | domain:Peptidase S1                                     | 9                                    | 2.02247191  | 0.00398  | 402        | 114      | 18012     | 3.537313433     | 0.2727728  | 0.01318384 | 1.47519173 |
| GOTERM_MF_DIRECT      | GO:0008233~peptidase activity                           | 22                                   | 4.943820225 | 0.00721  | 387        | 516      | 17446     | 1.922019911     | 97         | 1          | 5          |
| UP_KEYWORDS           | Serine protease                                         | 10                                   | 2.247191011 | 0.01049  | 445        | 173      | 22680     | 2.946028447     | 0.9987936  | 0.15117820 | 5.31987445 |
| GOTERM_MF_DIRECT      | GO:0008236~serine-type peptidase activity               | 10                                   | 2.247191011 | 0.01470  | 387        | 163      | 17446     | 2.765650513     | 39         | 7          | 8          |
| INTERPRO              | IPR001314:Peptidase S1A, chymotrypsin-type              | 9                                    | 2.02247191  | 0.01690  | 434        | 151      | 20594     | 2.828241829     | 0.9962947  | 0.17022487 | 6.36827086 |
| UP_SEQ_FEATURE        | active site:Charge relay system                         | 11                                   | 2.471910112 | 0.02011  | 402        | 205      | 18012     | 2.404222788     | 94         | 5          | 5          |
| INTERPRO              | IPR001254:Peptidase S1                                  | 9                                    | 2.02247191  | 0.02600  | 434        | 160      | 20594     | 2.669153226     | 0.8720242  | 0.06039945 |            |
| INTERPRO              | IPR009003:Trypsin-like cysteine/serine peptidase domain | 9                                    | 2.02247191  | 0.06391  | 434        | 168      | 20594     | 2.542050691     | 71         | 3          | 9.14704673 |
| SMART                 | SM00020:Tryp_SPc                                        | 9                                    | 2.02247191  | 0.26639  | 282        | 158      | 10425     | 2.105777        | 0.9982930  | 0.22502369 |            |
| UP_KEYWORDS           | Hydrolase                                               | 37                                   | 8.314606742 | 0.32561  | 445        | 1646     | 22680     | 1.145657843     | 9          | 7          | 14.442243  |
| INTERPRO              | IPR018114:Peptidase S1, trypsin family, active site     | 5                                    | 1.123595506 | 564      | 434        | 137      | 20594     | 1.73181069      | 0.9999905  | 0.24582790 | 20.2787450 |
|                       |                                                         |                                      |             |          |            |          |           |                 | 31         | 2          | 7          |
|                       |                                                         |                                      |             |          |            |          |           |                 | 0.01690    | 0.44977972 | 24.4894960 |
|                       |                                                         |                                      |             |          |            |          |           |                 | 1          | 4          | 9          |
|                       |                                                         |                                      |             |          |            |          |           |                 | 0.9999998  | 0.30281122 | 26.7245161 |
|                       |                                                         |                                      |             |          |            |          |           |                 | 72         | 6          | 2          |
|                       |                                                         |                                      |             |          |            |          |           |                 | 0.9999999  | 0.33739073 | 33.1807659 |
|                       |                                                         |                                      |             |          |            |          |           |                 | 99         | 6          | 7          |
|                       |                                                         |                                      |             |          |            |          |           |                 | 0.9999950  | 0.45716022 | 55.8361035 |
|                       |                                                         |                                      |             |          |            |          |           |                 | 63         | 4          | 5          |
|                       |                                                         |                                      |             |          |            |          |           |                 |            | 0.61170450 | 98.3509279 |
|                       |                                                         |                                      |             |          |            |          |           |                 | 1          | 8          | 7          |
|                       |                                                         |                                      |             |          |            |          |           |                 |            | 0.96342445 | 99.7589994 |
|                       |                                                         |                                      |             |          |            |          |           |                 | 1          | 1          | 6          |

**Table S1B: Go term analysis of genes expressed in the whole muscle but not in the myofiber**

| Annotation Cluster 21 |                                                                        | Enrichment Score: 1.6415986377900782 |             |                     |            |          |           |                 |                 |                 |                          |
|-----------------------|------------------------------------------------------------------------|--------------------------------------|-------------|---------------------|------------|----------|-----------|-----------------|-----------------|-----------------|--------------------------|
| Category              | Term                                                                   | Count                                | %           | PValue              | List Total | Pop Hits | Pop Total | Fold Enrichment | Bonferroni      | Benjamini       | FDR                      |
| GOTERM_MF_DIRECT      | GO:0016787~hydrolase activity                                          | 35                                   | 7.865168539 | 0.52079<br>7943     | 387        | 1533     | 17446     | 1.029226104     | 1               | 0.99158432<br>4 | 99.9981067<br>3          |
| UP_KEYWORDS           | Proteoglycan glycosylation site:N-linked (GlcNAc...) (keratan sulfate) | 8                                    | 1.797752809 | 2.51E-05<br>0.00146 | 445        | 45       | 22680     | 9.060674157     | 0.0070983<br>67 | 3.75E-04        | 0.03323319<br>2          |
| UP_SEQ_FEATURE        | IPR003591:Leucine-rich repeat, typical subtype                         | 3                                    | 0.674157303 | 0.00402<br>1382     | 402        | 3        | 18012     | 44.80597015     | 0.8713108<br>81 | 0.07874114<br>9 | 2.38124371               |
| INTERPRO              | IPR000372:Leucine-rich repeat-containing N-terminal                    | 11                                   | 2.471910112 | 0.00503<br>1462     | 434        | 175      | 20594     | 2.982672811     | 0.9570231<br>55 | 0.09958825<br>6 | 5.97962689               |
| INTERPRO              | compositionally biased region:Cys-rich                                 | 6                                    | 1.348314607 | 0.01075<br>1279     | 434        | 53       | 20594     | 5.371880706     | 0.9805390<br>92 | 0.11933302      | 7.42774729<br>8          |
| UP_SEQ_FEATURE        | SM00013:LRRNT                                                          | 9                                    | 2.02247191  | 0.01372<br>8438     | 402        | 135      | 18012     | 2.987064677     | 0.9999997<br>41 | 0.35983607      | 16.3270874<br>7          |
| SMART                 | repeat:LRR 11                                                          | 6                                    | 1.348314607 | 0.01375<br>013      | 282        | 53       | 10425     | 4.185066238     | 0.9223696<br>85 | 0.17848065<br>2 | 15.7132826<br>2          |
| UP_SEQ_FEATURE        | SM00369:LRR_TYP                                                        | 7                                    | 1.573033708 | 0.02007<br>2094     | 402        | 88       | 18012     | 3.564111262     | 0.9999999<br>96 | 0.41683455<br>3 | 20.4035854<br>2          |
| SMART                 | IPR001611:Leucine-rich repeat                                          | 11                                   | 2.471910112 | 0.02166<br>1741     | 282        | 175      | 10425     | 2.323708207     | 0.9765068<br>03 | 0.20898652<br>4 | 22.1892549<br>9          |
| INTERPRO              | m_slrpPathway:Small Leucine-rich Proteoglycan (SLRP) molecules         | 12                                   | 2.696629213 | 0.02485<br>8609     | 434        | 259      | 20594     | 2.198530328     | 0.9999999<br>63 | 0.30512694<br>2 | 28.4811034<br>5          |
| BIOCARTA              | repeat:LRR 7                                                           | 3                                    | 0.674157303 | 0.02531<br>5146     | 57         | 6        | 1289      | 11.30701754     | 0.9172354<br>84 | 0.56420585<br>3 | 24.3334087<br>1          |
| UP_SEQ_FEATURE        | repeat:LRR 10                                                          | 9                                    | 2.02247191  | 0.02759<br>8971     | 402        | 158      | 18012     | 2.552238806     | 0.56662273<br>1 | 0.58996405<br>1 | 34.4671335               |
| UP_SEQ_FEATURE        | repeat:LRR 6                                                           | 7                                    | 1.573033708 | 0.02768<br>1144     | 402        | 103      | 18012     | 3.045065932     | 1               | 0.58306074      | 36.9397983<br>37.0436363 |
| UP_SEQ_FEATURE        | repeat:LRR 12                                                          | 10                                   | 2.247191011 | 0.03144<br>8383     | 402        | 191      | 18012     | 2.345862311     | 1               | 0.60672792<br>9 | 40.9359963<br>3          |
| UP_SEQ_FEATURE        | repeat:LRR 12                                                          | 6                                    | 1.348314607 | 6561                | 402        | 79       | 18012     | 3.402985075     | 1               | 3               | 6                        |

**Table S1B: Go term analysis of genes expressed in the whole muscle but not in the myofiber**

|                |                                                        |    |             |                 |     |     |       |             |                 |                 |                 |
|----------------|--------------------------------------------------------|----|-------------|-----------------|-----|-----|-------|-------------|-----------------|-----------------|-----------------|
| UP_KEYWORDS    | Leucine-rich repeat                                    | 11 | 2.471910112 | 0.04524<br>1484 | 445 | 275 | 22680 | 2.038651685 | 0.9999980<br>51 | 0.21970337<br>7 | 45.8543592<br>9 |
| UP_SEQ_FEATURE | repeat:LRR 5                                           | 10 | 2.247191011 | 0.04617<br>009  | 402 | 210 | 18012 | 2.133617626 | 1               | 0.72732079<br>2 | 54.1129482<br>4 |
| UP_SEQ_FEATURE | repeat:LRR 9                                           | 7  | 1.573033708 | 0.05711<br>4635 | 402 | 123 | 18012 | 2.549933261 | 1               | 0.76461518<br>9 | 62.0602963<br>2 |
| UP_SEQ_FEATURE | repeat:LRR 4                                           | 10 | 2.247191011 | 0.07003<br>629  | 402 | 228 | 18012 | 1.965174129 | 1               | 0.81670291<br>1 | 69.7772686<br>2 |
| UP_SEQ_FEATURE | repeat:LRR 8                                           | 7  | 1.573033708 | 0.07921<br>8376 | 402 | 134 | 18012 | 2.340610381 | 1               | 0.84996575<br>5 | 74.3364100<br>9 |
| UP_SEQ_FEATURE | repeat:LRR 2                                           | 11 | 2.471910112 | 0.08754<br>616  | 402 | 274 | 18012 | 1.798779824 | 1               | 0.86982286<br>7 | 77.9050329<br>7 |
| UP_SEQ_FEATURE | repeat:LRR 1                                           | 11 | 2.471910112 | 0.08754<br>616  | 402 | 274 | 18012 | 1.798779824 | 1               | 0.86982286<br>7 | 77.9050329<br>7 |
| UP_SEQ_FEATURE | repeat:LRR 3                                           | 10 | 2.247191011 | 0.11253<br>0597 | 402 | 253 | 18012 | 1.770986962 | 1               | 0.92384323<br>5 | 86.0173050<br>8 |
| INTERPRO       | IPR000483:Cysteine-rich<br>flanking region, C-terminal | 4  | 0.898876404 | 0.21478<br>43   | 434 | 76  | 20594 | 2.497453311 | 1               | 0.88589233<br>6 | 97.5273212<br>6 |
| SMART          | SM00082:LRRCT                                          | 4  | 0.898876404 | 0.32922<br>2415 | 282 | 75  | 10425 | 1.971631206 | 1               | 0.85687637<br>7 | 99.2853176<br>9 |

| <b>Annotation Cluster 22</b>                |                                                            |              |             |                 |                   |                 |                  |                        |                   |                  |                 |
|---------------------------------------------|------------------------------------------------------------|--------------|-------------|-----------------|-------------------|-----------------|------------------|------------------------|-------------------|------------------|-----------------|
| <b>Enrichment Score: 1.6270706201910659</b> |                                                            |              |             |                 |                   |                 |                  |                        |                   |                  |                 |
| <b>Category</b>                             | <b>Term</b>                                                | <b>Count</b> | <b>%</b>    | <b>PValue</b>   | <b>List Total</b> | <b>Pop Hits</b> | <b>Pop Total</b> | <b>Fold Enrichment</b> | <b>Bonferroni</b> | <b>Benjamini</b> | <b>FDR</b>      |
| GOTERM_MF_DIRECT                            | GO:0098641~cadherin binding involved in cell-cell adhesion | 13           | 2.921348315 | 0.02192<br>2478 | 387               | 279             | 17446            | 2.100506608            | 0.9999984<br>67   | 0.35071675<br>7  | 27.9404887<br>4 |
| GOTERM_CC_DIRECT                            | GO:0005913~cell-cell adherens junction                     | 14           | 3.146067416 | 0.02230<br>2559 | 431               | 316             | 19662            | 2.021116626            | 0.9989711<br>17   | 0.19901440<br>4  | 26.0782337<br>1 |
| GOTERM_BP_DIRECT                            | GO:0098609~cell-cell adhesion                              | 10           | 2.247191011 | 0.02688<br>709  | 406               | 189             | 18082            | 2.356452159            | 1                 | 0.48673768<br>4  | 37.6261091<br>3 |

| <b>Annotation Cluster 23</b>               |             |              |          |               |                   |                 |                  |                        |                   |                  |            |
|--------------------------------------------|-------------|--------------|----------|---------------|-------------------|-----------------|------------------|------------------------|-------------------|------------------|------------|
| <b>Enrichment Score: 1.597922731370309</b> |             |              |          |               |                   |                 |                  |                        |                   |                  |            |
| <b>Category</b>                            | <b>Term</b> | <b>Count</b> | <b>%</b> | <b>PValue</b> | <b>List Total</b> | <b>Pop Hits</b> | <b>Pop Total</b> | <b>Fold Enrichment</b> | <b>Bonferroni</b> | <b>Benjamini</b> | <b>FDR</b> |

**Table S1B: Go term analysis of genes expressed in the whole muscle but not in the myofiber**

|                  |                                                                                                      |    |             |             |     |     |       |             |             |             |             |
|------------------|------------------------------------------------------------------------------------------------------|----|-------------|-------------|-----|-----|-------|-------------|-------------|-------------|-------------|
| GOTERM_BP_DIRECT | GO:0019886~antigen processing and presentation of exogenous peptide antigen via MHC class II         | 7  | 1.573033708 | 3.14E-07    | 406 | 14  | 18082 | 22.26847291 | 6.68E-04    | 1.11E-04    | 5.44E-04    |
| GOTERM_BP_DIRECT | GO:0019882~antigen processing and presentation                                                       | 8  | 1.797752809 | 1.92E-04    | 406 | 54  | 18082 | 6.598066046 | 0.335380502 | 0.017605808 | 0.331782058 |
| KEGG_PATHWAY     | mmu04145:Phagosome                                                                                   | 13 | 2.921348315 | 7.87E-04    | 185 | 171 | 7691  | 3.160518413 | 0.142946427 | 0.021795379 | 0.978359911 |
| KEGG_PATHWAY     | mmu05152:Tuberculosis                                                                                | 13 | 2.921348315 | 5256        | 185 | 176 | 7691  | 3.070730958 | 0.180524944 | 0.021878377 | 1.260935163 |
| GOTERM_CC_DIRECT | GO:0042613~MHC class II protein complex                                                              | 4  | 0.898876404 | 2677        | 431 | 12  | 19662 | 15.20649652 | 0.452427749 | 0.034806915 | 2.610664101 |
| KEGG_PATHWAY     | mmu05310:Asthma                                                                                      | 5  | 1.123595506 | 5575        | 185 | 24  | 7691  | 8.661036036 | 0.365157846 | 0.044421047 | 2.854549424 |
| GOTERM_BP_DIRECT | GO:0048002~antigen processing and presentation of peptide antigen                                    | 3  | 0.674157303 | 0.00291425  | 406 | 4   | 18082 | 33.40270936 | 0.997997776 | 0.143873743 | 4.92885243  |
| KEGG_PATHWAY     | mmu05323:Rheumatoid arthritis                                                                        | 7  | 1.573033708 | 0.013471917 | 185 | 82  | 7691  | 3.548912327 | 0.929942809 | 0.153083108 | 15.58640744 |
| GOTERM_BP_DIRECT | GO:0002504~antigen processing and presentation of peptide or polysaccharide antigen via MHC class II | 3  | 0.674157303 | 0.016233459 | 406 | 9   | 18082 | 14.8456486  | 0.99531901  | 0.375543366 | 24.68185083 |
| UP_KEYWORDS      | MHC II                                                                                               | 3  | 0.674157303 | 0.018710983 | 445 | 11  | 22680 | 13.89989785 | 0.995319089 | 0.114776441 | 22.14278667 |
| INTERPRO         | IPR014745:MHC class II, alpha/beta chain, N-terminal                                                 | 3  | 0.674157303 | 0.021396169 | 434 | 11  | 20594 | 12.94134897 | 0.999999954 | 0.307337474 | 28.17574822 |
| KEGG_PATHWAY     | mmu05145:Toxoplasmosis                                                                               | 7  | 1.573033708 | 0.03967166  | 185 | 105 | 7691  | 2.771531532 | 0.999641681 | 0.341363498 | 39.69146077 |
| KEGG_PATHWAY     | mmu05416:Viral myocarditis                                                                           | 6  | 1.348314607 | 0.040369481 | 185 | 79  | 7691  | 3.157440985 | 0.999689262 | 0.332241074 | 40.23664073 |
| UP_SEQ_FEATURE   | domain:Ig-like C1-type                                                                               | 4  | 0.898876404 | 0.045506146 | 402 | 36  | 18012 | 4.978441128 | 0.729081451 | 0.729081452 | 53.58372668 |



**Table S1B: Go term analysis of genes expressed in the whole muscle but not in the myofiber**

|                  |                                                                                    |    |             |                 |     |     |       |             |                 |                 |                          |
|------------------|------------------------------------------------------------------------------------|----|-------------|-----------------|-----|-----|-------|-------------|-----------------|-----------------|--------------------------|
| KEGG_PATHWAY     | mmu04612:Antigen processing and presentation region of interest:Connecting peptide | 6  | 1.348314607 | 0.04619<br>7489 | 185 | 82  | 7691  | 3.041924852 | 0.9999058<br>42 | 0.35689931<br>1 | 44.6159139               |
| UP_SEQ_FEATURE   | IPR011162:MHC classes I/II-like antigen recognition protein                        | 4  | 0.898876404 | 0.05206<br>6133 | 402 | 38  | 18012 | 4.71641791  | 1               | 0.75048934<br>2 | 58.5702409<br>9          |
| INTERPRO         | mmu05168:Herpes simplex infection                                                  | 5  | 1.123595506 | 0.05733<br>7563 | 434 | 69  | 20594 | 3.438522674 | 1               | 0.53045707      | 59.4855512<br>3          |
| KEGG_PATHWAY     | mmu05140:Leishmaniasis                                                             | 10 | 2.247191011 | 0.06157<br>8498 | 185 | 208 | 7691  | 1.998700624 | 0.9999961<br>1  | 0.43233668<br>6 | 54.7955063<br>5          |
| KEGG_PATHWAY     | mmu04672:Intestinal immune network for IgA production                              | 5  | 1.123595506 | 0.06650<br>5078 | 185 | 64  | 7691  | 3.247888514 | 0.9999986<br>13 | 0.44370914<br>5 | 57.6723754<br>3          |
| KEGG_PATHWAY     | mmu05332:Graft-versus-host disease                                                 | 4  | 0.898876404 | 0.07842<br>8545 | 185 | 42  | 7691  | 3.959330759 | 0.9999998<br>88 | 0.45973935      | 63.9521814<br>5          |
| KEGG_PATHWAY     | mmu05330:Allograft rejection                                                       | 4  | 0.898876404 | 0.12754<br>388  | 185 | 52  | 7691  | 3.197920998 | 1               | 0.57796682<br>4 | 81.8138901<br>86.8002878 |
| KEGG_PATHWAY     | IPR003597:Immunoglobulin C1-set                                                    | 4  | 0.898876404 | 0.14963<br>99   | 185 | 56  | 7691  | 2.969498069 | 1               | 0.60719114      | 2                        |
| INTERPRO         | mmu04940:Type I diabetes mellitus                                                  | 5  | 1.123595506 | 0.16361<br>8228 | 434 | 101 | 20594 | 2.349089748 | 0.82522693<br>1 | 93.5036582<br>1 | 4                        |
| KEGG_PATHWAY     | mmu05164:Influenza A                                                               | 4  | 0.898876404 | 0.18483<br>2232 | 185 | 62  | 7691  | 2.682127289 | 1               | 0.66127366      | 92.2150856<br>4          |
| KEGG_PATHWAY     | mmu05320:Autoimmune thyroid disease                                                | 7  | 1.573033708 | 0.22626<br>1131 | 185 | 171 | 7691  | 1.701817607 | 1               | 0.69793022<br>8 | 95.9424245<br>8          |
| KEGG_PATHWAY     | GO:0042605~peptide antigen binding                                                 | 4  | 0.898876404 | 0.24102<br>0573 | 185 | 71  | 7691  | 2.342139322 | 1               | 0.69916031<br>2 | 96.8101205<br>4          |
| GOTERM_MF_DIRECT | IPR003006:Immunoglobulin/major histocompatibility complex, conserved site          | 3  | 0.674157303 | 0.26259<br>216  | 387 | 45  | 17446 | 3.005340224 | 1               | 0.93050341      | 98.8924410<br>9          |
| INTERPRO         | SM00407:IGc1                                                                       | 4  | 0.898876404 | 0.26519<br>5805 | 434 | 85  | 20594 | 2.233017078 | 1               | 0.93307036<br>9 | 99.1041869<br>6          |
| SMART            | mmu05321:Inflammatory bowel disease (IBD)                                          | 5  | 1.123595506 | 0.27156<br>263  | 282 | 98  | 10425 | 1.886126791 | 1               | 0.82165876<br>4 | 98.0172624<br>6          |
| KEGG_PATHWAY     |                                                                                    | 3  | 0.674157303 | 0.41436<br>8966 | 185 | 59  | 7691  | 2.113879982 | 1               | 0.83604311<br>4 | 99.8749609<br>4          |

**Table S1B: Go term analysis of genes expressed in the whole muscle but not in the myofiber**

|              |                           |   |             |                |     |     |      |             |   |                 |                 |
|--------------|---------------------------|---|-------------|----------------|-----|-----|------|-------------|---|-----------------|-----------------|
| KEGG_PATHWAY | mmu05166:HTLV-I infection | 7 | 1.573033708 | 0.65266<br>016 | 185 | 276 | 7691 | 1.054386996 | 1 | 0.93692769<br>7 | 99.9998168<br>2 |
|--------------|---------------------------|---|-------------|----------------|-----|-----|------|-------------|---|-----------------|-----------------|

| <b>Annotation Cluster 24</b>       |                               |       |             |                     |            |          |           |                 |                 |                 |                 |
|------------------------------------|-------------------------------|-------|-------------|---------------------|------------|----------|-----------|-----------------|-----------------|-----------------|-----------------|
| Enrichment Score: 1.58788806428931 |                               |       |             |                     |            |          |           |                 |                 |                 |                 |
| Category                           | Term                          | Count | %           | PValue              | List Total | Pop Hits | Pop Total | Fold Enrichment | Bonferroni      | Benjamini       | FDR             |
| GOTERM_CC_DIRECT                   | GO:0001725~stress fiber       | 9     | 2.02247191  | 1.03E-04<br>0.28975 | 431        | 67       | 19662     | 6.127991135     | 0.0310538<br>41 | 0.00225076<br>5 | 0.13846647<br>4 |
| UP_KEYWORDS                        | Calmodulin-binding            | 5     | 1.123595506 | 3617                | 445        | 139      | 22680     | 1.833319861     | 1               | 2               | 98.9260646<br>9 |
| GOTERM_MF_DIRECT                   | GO:0005516~calmodulin binding | 5     | 1.123595506 | 0.57501<br>8408     | 387        | 182      | 17446     | 1.238464378     | 1               | 8               | 99.9996791<br>4 |

| <b>Annotation Cluster 25</b>         |                                                                                |       |             |                 |            |          |           |                 |                 |                          |                 |
|--------------------------------------|--------------------------------------------------------------------------------|-------|-------------|-----------------|------------|----------|-----------|-----------------|-----------------|--------------------------|-----------------|
| Enrichment Score: 1.5048163336056697 |                                                                                |       |             |                 |            |          |           |                 |                 |                          |                 |
| Category                             | Term                                                                           | Count | %           | PValue          | List Total | Pop Hits | Pop Total | Fold Enrichment | Bonferroni      | Benjamini                | FDR             |
| INTERPRO                             | IPR014715:Fibrinogen, alpha/beta/gamma chain, C-terminal globular, subdomain 2 | 4     | 0.898876404 | 0.01056<br>2919 | 434        | 22       | 20594     | 8.627565982     | 0.9997498<br>67 | 0.19607597<br>4          | 14.9974405<br>5 |
| SMART                                | SM00186:FBG                                                                    | 4     | 0.898876404 | 0.02042<br>3836 | 282        | 22       | 10425     | 6.721470019     | 0.9780179<br>28 | 0.20113273<br>6          | 22.5344954<br>2 |
| INTERPRO                             | IPR014716:Fibrinogen, alpha/beta/gamma chain, C-terminal globular, subdomain 1 | 4     | 0.898876404 | 0.02249<br>9494 | 434        | 29       | 20594     | 6.545050056     | 0.9999999<br>81 | 0.30944987<br>5          | 29.4048988<br>8 |
| INTERPRO                             | IPR002181:Fibrinogen, alpha/beta/gamma chain, C-terminal globular domain       | 4     | 0.898876404 | 0.02916<br>8827 | 434        | 32       | 20594     | 5.931451613     | 1               | 0.35892557<br>0.50793120 | 36.4261116<br>9 |
| INTERPRO                             | IPR020837:Fibrinogen, conserved site domain:Fibrinogen C-terminal              | 3     | 0.674157303 | 0.04871<br>2747 | 434        | 17       | 20594     | 8.373814042     | 1               | 9                        | 53.4269290<br>8 |
| UP_SEQ_FEATURE                       |                                                                                | 3     | 0.674157303 | 0.13565<br>8305 | 402        | 29       | 18012     | 4.63510036      | 1               | 0.95267183<br>2          | 90.9509172<br>9 |

**Table S1B: Go term analysis of genes expressed in the whole muscle but not in the myofiber**

| Annotation Cluster 26                |                                              |       |             |          |            |          |           |                 |            |            |            |
|--------------------------------------|----------------------------------------------|-------|-------------|----------|------------|----------|-----------|-----------------|------------|------------|------------|
| Enrichment Score: 1.4502255705010767 |                                              |       |             |          |            |          |           |                 |            |            |            |
| Category                             | Term                                         | Count | %           | PValue   | List Total | Pop Hits | Pop Total | Fold Enrichment | Bonferroni | Benjamini  | FDR        |
| GOTERM_MF_DIRECT                     | GO:0005044~scavenger receptor activity       | 7     | 1.573033708 | 6.32E-04 | 387        | 48       | 17446     | 6.57418174      | 0.3172062  | 0.03129666 | 0.92951268 |
| INTERPRO                             | IPR001190:Speract/scavenger receptor         | 3     | 0.674157303 | 0.11664  | 7321       | 434      | 20594     | 5.084101382     | 02         | 0.74938284 | 7          |
| INTERPRO                             | IPR017448:Speract/scavenger receptor-related | 3     | 0.674157303 | 0.12362  | 1235       | 434      | 20594     | 4.908787542     | 1          | 0.75628556 | 6          |
| SMART                                | SM00202:SR                                   | 3     | 0.674157303 | 0.17367  | 5453       | 282      | 10425     | 3.960866261     | 1          | 0.70387279 | 3          |
|                                      |                                              |       |             |          |            |          |           |                 | 1          | 2          | 5          |

  

| Annotation Cluster 27                |                                                |       |             |         |            |          |           |                 |            |            |            |
|--------------------------------------|------------------------------------------------|-------|-------------|---------|------------|----------|-----------|-----------------|------------|------------|------------|
| Enrichment Score: 1.4088413156006931 |                                                |       |             |         |            |          |           |                 |            |            |            |
| Category                             | Term                                           | Count | %           | PValue  | List Total | Pop Hits | Pop Total | Fold Enrichment | Bonferroni | Benjamini  | FDR        |
| GOTERM_MF_DIRECT                     | GO:0019864~IgG binding                         | 3     | 0.674157303 | 0.00952 | 6094       | 387      | 17446     | 19.3200443      | 0.9969154  | 0.21407131 | 13.1941497 |
| GOTERM_BP_DIRECT                     | GO:0045576~mast cell activation                | 3     | 0.674157303 | 0.03315 | 9727       | 406      | 18082     | 10.27775673     | 25         | 9          | 44.2347974 |
| GOTERM_BP_DIRECT                     | GO:0006911~phagocytosis, engulfment            | 4     | 0.898876404 | 0.07942 | 6937       | 406      | 18082     | 3.958839628     | 1          | 0.53033105 | 4          |
| GOTERM_BP_DIRECT                     | GO:0050766~positive regulation of phagocytosis | 4     | 0.898876404 | 0.09228 | 7125       | 406      | 18082     | 3.711412151     | 1          | 0.76686705 | 3          |
|                                      |                                                |       |             |         |            |          |           |                 | 1          | 4          | 81.3050880 |
|                                      |                                                |       |             |         |            |          |           |                 | 1          | 0.80273145 | 8          |

  

| Annotation Cluster 28                |                                          |       |             |         |            |          |           |                 |            |            |            |
|--------------------------------------|------------------------------------------|-------|-------------|---------|------------|----------|-----------|-----------------|------------|------------|------------|
| Enrichment Score: 1.3427894755428242 |                                          |       |             |         |            |          |           |                 |            |            |            |
| Category                             | Term                                     | Count | %           | PValue  | List Total | Pop Hits | Pop Total | Fold Enrichment | Bonferroni | Benjamini  | FDR        |
| SMART                                | SM00327:VWA                              | 7     | 1.573033708 | 0.01203 | 6208       | 282      | 10425     | 3.644740785     | 0.8935635  | 0.18425643 | 13.9152153 |
| INTERPRO                             | IPR002035: von Willebrand factor, type A | 7     | 1.573033708 | 0.01817 | 046        | 434      | 20594     | 3.355164549     | 91         | 6          | 24.4664605 |
| UP_SEQ_FEATURE                       | domain:VWFA 1                            | 3     | 0.674157303 | 0.04829 | 6378       | 402      | 18012     | 8.401119403     | 0.9999993  | 0.28893503 | 6          |
| UP_SEQ_FEATURE                       | domain:VWFA 2                            | 3     | 0.674157303 | 0.05394 | 8633       | 402      | 18012     | 7.906935909     | 97         | 9          | 55.7698991 |
|                                      |                                          |       |             |         |            |          |           |                 | 1          | 6          | 1          |
|                                      |                                          |       |             |         |            |          |           |                 | 1          | 0.75675481 | 59.9054592 |
|                                      |                                          |       |             |         |            |          |           |                 | 1          | 4          | 3          |

**Table S1B: Go term analysis of genes expressed in the whole muscle but not in the myofiber**

|                |             |   |             |                 |     |    |       |             |   |                 |            |
|----------------|-------------|---|-------------|-----------------|-----|----|-------|-------------|---|-----------------|------------|
| UP_SEQ_FEATURE | domain:VWFA | 3 | 0.674157303 | 0.33907<br>9856 | 402 | 54 | 18012 | 2.489220564 | 1 | 0.99873610<br>4 | 99.8913236 |
|----------------|-------------|---|-------------|-----------------|-----|----|-------|-------------|---|-----------------|------------|

| Annotation Cluster 29               |                                         |       |             |                 |            |          |           |                 |                 |                 |                 |
|-------------------------------------|-----------------------------------------|-------|-------------|-----------------|------------|----------|-----------|-----------------|-----------------|-----------------|-----------------|
| Enrichment Score: 1.233977855072754 |                                         |       |             |                 |            |          |           |                 |                 |                 |                 |
| Category                            | Term                                    | Count | %           | PValue          | List Total | Pop Hits | Pop Total | Fold Enrichment | Bonferroni      | Benjamini       | FDR             |
| UP_SEQ_FEATURE                      | domain:VWFC                             | 3     | 0.674157303 | 0.05394<br>8633 | 402        | 17       | 18012     | 7.906935909     | 1               | 0.75675481<br>4 | 59.9054592<br>3 |
| INTERPRO                            | IPR001007:von Willebrand factor, type C | 4     | 0.898876404 | 0.05466<br>62   | 434        | 41       | 20594     | 4.629425649     | 1               | 0.52486822<br>9 | 57.6927004      |
| SMART                               | SM00214:VWC                             | 4     | 0.898876404 | 0.06735<br>4575 | 282        | 35       | 10425     | 4.224924012     | 0.9999975<br>02 | 0.45897497<br>8 | 57.8033443<br>6 |

| Annotation Cluster 30                |                                              |       |             |                     |            |          |           |                 |                 |                 |                 |
|--------------------------------------|----------------------------------------------|-------|-------------|---------------------|------------|----------|-----------|-----------------|-----------------|-----------------|-----------------|
| Enrichment Score: 1.2251359177671484 |                                              |       |             |                     |            |          |           |                 |                 |                 |                 |
| Category                             | Term                                         | Count | %           | PValue              | List Total | Pop Hits | Pop Total | Fold Enrichment | Bonferroni      | Benjamini       | FDR             |
| GOTERM_BP_DIRECT                     | GO:0030574~collagen catabolic process        | 6     | 1.348314607 | 1.64E-04<br>0.04283 | 406        | 24       | 18082     | 11.13423645     | 0.2954346<br>56 | 0.01579100<br>3 | 0.28444930<br>8 |
| UP_KEYWORDS                          | Collagen degradation                         | 3     | 0.674157303 | 8913                | 445        | 17       | 22680     | 8.994051553     | 0.9999960<br>21 | 0.21268408<br>2 | 44.0207352      |
| INTERPRO                             | IPR024079:Metallopeptidase, catalytic domain | 6     | 1.348314607 | 0.05390<br>0809     | 434        | 97       | 20594     | 2.935151314     | 1<br>0.9999999  | 1<br>0.26347222 | 3<br>57.5197636 |
| UP_KEYWORDS                          | Metalloprotease                              | 7     | 1.573033708 | 4566                | 445        | 143      | 22680     | 2.494853461     | 89              | 4               | 3               |
| GOTERM_MF_DIRECT                     | GO:0008237~metallopeptidase activity         | 8     | 1.797752809 | 0.06534<br>7445     | 387        | 160      | 17446     | 2.254005168     | 1               | 8               | 63.1759587<br>8 |
| INTERPRO                             | IPR021190:Peptidase M10A                     | 3     | 0.674157303 | 0.08351<br>2869     | 434        | 23       | 20594     | 6.189340813     | 1               | 7               | 73.6685683<br>2 |
| INTERPRO                             | IPR001818:Peptidase M10, metallopeptidase    | 3     | 0.674157303 | 0.08351<br>2869     | 434        | 23       | 20594     | 6.189340813     | 1               | 7               | 73.6685683<br>2 |
| INTERPRO                             | IPR006026:Peptidase, metallopeptidase        | 3     | 0.674157303 | 0.12362<br>1235     | 434        | 29       | 20594     | 4.908787542     | 1               | 2               | 86.7231222<br>3 |
| GOTERM_MF_DIRECT                     | GO:0004222~metalloendopeptidase activity     | 6     | 1.348314607 | 0.13743<br>8234     | 387        | 123      | 17446     | 2.199029432     | 1               | 4               | 88.7589331<br>4 |
| SMART                                | SM00235:ZnMc                                 | 3     | 0.674157303 | 0.18341<br>087      | 282        | 29       | 10425     | 3.824284666     | 1               | 4               | 91.8501843<br>8 |

**Table S1B: Go term analysis of genes expressed in the whole muscle but not in the myofiber**

| UP_SEQ_FEATURE                              | short sequence motif:Cysteine switch    | 3     | 0.674157303 | 0.21530 | 1564       | 402      | 39        | 18012           | 3.446613088 | 1         | 0.98858322 | 98.1602928 |
|---------------------------------------------|-----------------------------------------|-------|-------------|---------|------------|----------|-----------|-----------------|-------------|-----------|------------|------------|
| UP_SEQ_FEATURE                              | metal ion-binding site:Zinc; catalytic  | 5     | 1.123595506 | 0.27360 | 608        | 402      | 119       | 18012           | 1.882603788 | 1         | 0.99576958 | 99.4845583 |
| <b>Annotation Cluster 31</b>                |                                         |       |             |         |            |          |           |                 |             |           |            |            |
| <b>Enrichment Score: 1.221102979152116</b>  |                                         |       |             |         |            |          |           |                 |             |           |            |            |
| Category                                    | Term                                    | Count | %           | PValue  | List Total | Pop Hits | Pop Total | Fold Enrichment | Bonferroni  | Benjamini | FDR        |            |
| UP_SEQ_FEATURE                              | domain:TSP type-1                       | 3     | 0.674157303 | 0.04829 | 6378       | 402      | 16        | 18012           | 8.401119403 | 1         | 0.73003360 | 55.7698991 |
| INTERPRO                                    | IPR000884:Thrombospondin, type 1 repeat | 5     | 1.123595506 | 0.05015 | 2532       | 434      | 66        | 20594           | 3.594819159 | 1         | 0.51207700 | 54.4939245 |
| SMART                                       | SM00209:TSP1                            | 5     | 1.123595506 | 0.08963 | 624        | 282      | 63        | 10425           | 2.933975008 | 72        | 0.53016385 | 68.7152264 |
| <b>Annotation Cluster 32</b>                |                                         |       |             |         |            |          |           |                 |             |           |            |            |
| <b>Enrichment Score: 1.2000886019689037</b> |                                         |       |             |         |            |          |           |                 |             |           |            |            |
| Category                                    | Term                                    | Count | %           | PValue  | List Total | Pop Hits | Pop Total | Fold Enrichment | Bonferroni  | Benjamini | FDR        |            |
| UP_KEYWORDS                                 | Metal-binding                           | 89    | 20          | 0.00311 | 2431       | 445      | 3395      | 22680           | 1.336082474 | 17        | 0.03112354 | 4.04664844 |
| GOTERM_MF_DIRECT                            | GO:0046872~metal ion binding            | 82    | 18.42696629 | 0.20524 | 5361       | 387      | 3355      | 17446           | 1.101808786 | 1         | 0.88171354 | 96.6489721 |
| UP_KEYWORDS                                 | Zinc                                    | 44    | 9.887640449 | 0.39297 | 1612       | 445      | 2099      | 22680           | 1.068373918 | 1         | 0.73747918 | 99.8659583 |
| <b>Annotation Cluster 33</b>                |                                         |       |             |         |            |          |           |                 |             |           |            |            |
| <b>Enrichment Score: 1.1928792488817384</b> |                                         |       |             |         |            |          |           |                 |             |           |            |            |
| Category                                    | Term                                    | Count | %           | PValue  | List Total | Pop Hits | Pop Total | Fold Enrichment | Bonferroni  | Benjamini | FDR        |            |
| GOTERM_MF_DIRECT                            | GO:0030246~carbohydrate binding         | 14    | 3.146067416 | 0.00182 | 4712       | 387      | 229       | 17446           | 2.755988852 | 19        | 0.07090303 | 2.66375475 |
| INTERPRO                                    | IPR016186:C-type lectin-like            | 8     | 1.797752809 | 0.02592 | 8719       | 434      | 137       | 20594           | 2.770897104 | 99        | 0.34211444 | 33.1008606 |
| INTERPRO                                    | IPR016187:C-type lectin fold            | 8     | 1.797752809 | 0.03383 | 7993       | 434      | 145       | 20594           | 2.618020022 | 1         | 0.39217569 | 40.9471277 |

**Table S1B: Go term analysis of genes expressed in the whole muscle but not in the myofiber**

|                |                                            |   |             |                 |     |     |       |             |                 |                 |                 |
|----------------|--------------------------------------------|---|-------------|-----------------|-----|-----|-------|-------------|-----------------|-----------------|-----------------|
| UP_KEYWORDS    | Lectin                                     | 8 | 1.797752809 | 0.05438<br>1697 | 445 | 173 | 22680 | 2.356822758 | 0.9999998<br>73 | 0.24315771<br>8 | 52.3345198<br>3 |
| INTERPRO       | IPR001304:C-type lectin                    | 6 | 1.348314607 | 0.12087<br>2992 | 434 | 124 | 20594 | 2.296045786 | 1               | 0.75758033<br>6 | 86.0715544<br>3 |
| SMART          | SM00034:CLECT                              | 6 | 1.348314607 | 0.24272<br>1431 | 282 | 124 | 10425 | 1.788778312 | 1               | 0.79957734<br>9 | 96.7942428<br>9 |
| INTERPRO       | IPR018378:C-type lectin,<br>conserved site | 3 | 0.674157303 | 0.29111<br>1341 | 434 | 51  | 20594 | 2.791271347 | 1               | 0.94780868<br>4 | 99.4828565<br>5 |
| UP_SEQ_FEATURE | domain:C-type lectin                       | 4 | 0.898876404 | 0.38515<br>6161 | 402 | 100 | 18012 | 1.792238806 | 1               | 0.99939610<br>8 | 99.9669677<br>5 |

| <b>Annotation Cluster 34</b>                |                                                          |              |             |                 |                   |                 |                  |                        |                   |                  |                 |
|---------------------------------------------|----------------------------------------------------------|--------------|-------------|-----------------|-------------------|-----------------|------------------|------------------------|-------------------|------------------|-----------------|
| <b>Enrichment Score: 1.1849416718469874</b> |                                                          |              |             |                 |                   |                 |                  |                        |                   |                  |                 |
| <b>Category</b>                             | <b>Term</b>                                              | <b>Count</b> | <b>%</b>    | <b>PValue</b>   | <b>List Total</b> | <b>Pop Hits</b> | <b>Pop Total</b> | <b>Fold Enrichment</b> | <b>Bonferroni</b> | <b>Benjamini</b> | <b>FDR</b>      |
|                                             | GO:0035023~regulation of Rho protein signal transduction | 6            | 1.348314607 | 0.02921<br>372  | 406               | 77              | 18082            | 3.470411362            | 1                 | 0.50409062<br>8  | 40.1590800<br>8 |
| UP_KEYWORDS                                 | Guanine-nucleotide releasing factor                      | 7            | 1.573033708 | 0.04705<br>2642 | 445               | 133             | 22680            | 2.682436428            | 0.9999988<br>63   | 0.22031448<br>9  | 47.1997376<br>7 |
| INTERPRO                                    | IPR000219:Dbl homology (DH) domain                       | 5            | 1.123595506 | 0.05488<br>4301 | 434               | 68              | 20594            | 3.489089184            | 1                 | 0.52038128<br>5  | 57.8418099<br>8 |
| GOTERM_MF_DIRECT                            | GO:0005085~guanylnucleotide exchange factor activity     | 8            | 1.797752809 | 0.05865<br>5897 | 387               | 156             | 17446            | 2.311800172            | 1                 | 0.59857821<br>4  | 59.0804115<br>1 |
| GOTERM_MF_DIRECT                            | GO:0005089~Rho guanylnucleotide exchange factor activity | 5            | 1.123595506 | 0.08143<br>9092 | 387               | 74              | 17446            | 3.04595293             | 1                 | 0.67221320<br>1  | 71.5136379<br>5 |
| SMART                                       | SM00325:RhoGEF                                           | 5            | 1.123595506 | 0.09783<br>8488 | 282               | 65              | 10425            | 2.843698854            | 0.9999999<br>95   | 0.51934821<br>2  | 72.0297953<br>1 |
| UP_SEQ_FEATURE                              | domain:DH                                                | 4            | 0.898876404 | 0.14392<br>4575 | 402               | 59              | 18012            | 3.037692891            | 1                 | 0.95939711<br>8  | 92.2762495<br>4 |

| <b>Annotation Cluster 35</b>                |             |              |          |               |                   |                 |                  |                        |                   |                  |            |
|---------------------------------------------|-------------|--------------|----------|---------------|-------------------|-----------------|------------------|------------------------|-------------------|------------------|------------|
| <b>Enrichment Score: 1.1241069565118231</b> |             |              |          |               |                   |                 |                  |                        |                   |                  |            |
| <b>Category</b>                             | <b>Term</b> | <b>Count</b> | <b>%</b> | <b>PValue</b> | <b>List Total</b> | <b>Pop Hits</b> | <b>Pop Total</b> | <b>Fold Enrichment</b> | <b>Bonferroni</b> | <b>Benjamini</b> | <b>FDR</b> |

**Table S1B: Go term analysis of genes expressed in the whole muscle but not in the myofiber**

| INTERPRO                                   | IPR011993:Pleckstrin<br>homology-like domain                                                             | 17    | 3.820224719 | 0.01330  | 597           | 434         | 409          | 20594              | 1.972316429 | 0.9999713  | 89         | 0.23013722 | 18.5327240 | 6 |
|--------------------------------------------|----------------------------------------------------------------------------------------------------------|-------|-------------|----------|---------------|-------------|--------------|--------------------|-------------|------------|------------|------------|------------|---|
| INTERPRO                                   | IPR001849:Pleckstrin<br>homology domain                                                                  | 11    | 2.471910112 | 0.05117  | 2552          | 434         | 262          | 20594              | 1.99224329  | 1          | 1          | 0.51311638 | 55.2359650 | 7 |
| SMART                                      | SM00233:PH                                                                                               | 11    | 2.471910112 | 0.14608  | 0939          | 282         | 253          | 10425              | 1.607308048 | 1          | 3          | 0.64774238 | 85.8302472 | 6 |
| UP_SEQ_FEATURE                             | domain:PH                                                                                                | 7     | 1.573033708 | 0.32054  | 9435          | 402         | 208          | 18012              | 1.507893226 | 1          | 9          | 0.99829551 | 99.82859   |   |
| <b>Annotation Cluster 36</b>               |                                                                                                          |       |             |          |               |             |              |                    |             |            |            |            |            |   |
| <b>Enrichment Score: 1.104322357699511</b> |                                                                                                          |       |             |          |               |             |              |                    |             |            |            |            |            |   |
| Category                                   | Term                                                                                                     | Count | %           | PValue   | List<br>Total | Pop<br>Hits | Pop<br>Total | Fold<br>Enrichment | Bonferroni  | Benjamini  | FDR        |            |            |   |
| INTERPRO                                   | IPR004021:HIN-<br>200/IF120x                                                                             | 4     | 0.898876404 | 9.92E-04 | 434           | 10          | 20594        | 18.98064516        | 0.5394562   | 0.02938079 | 1.50760131 | 56         | 5          | 6 |
| UP_SEQ_FEATURE                             | domain:HIN-200                                                                                           | 3     | 0.674157303 | 0.00964  | 1235          | 7           | 18012        | 19.20255864        | 0.9999987   | 0.34587449 | 14.7561438 | 38         | 5          | 4 |
| INTERPRO                                   | IPR004020:DAPIN domain                                                                                   | 4     | 0.898876404 | 0.01857  | 2915          | 434         | 27           | 20594              | 7.029868578 | 0.9999995  | 0.28859114 | 62         | 2          | 2 |
| SMART                                      | SM01289:SM01289<br>GO:0035458~cellular<br>response to interferon-<br>beta                                | 4     | 0.898876404 | 0.03516  | 5574          | 282         | 27           | 10425              | 5.476753349 | 0.9986702  | 0.30783563 | 61         | 2          | 7 |
| GOTERM_BP_DIRECT                           | GO:0001047~core<br>promoter binding                                                                      | 4     | 0.898876404 | 0.06361  | 9933          | 406         | 41           | 18082              | 4.345067884 | 1          | 0.70073998 | 9933       | 4          | 3 |
| UP_SEQ_FEATURE                             | domain:DAPIN                                                                                             | 3     | 0.674157303 | 0.12064  | 8182          | 402         | 27           | 18012              | 4.978441128 | 1          | 0.93485521 | 8182       | 5          | 3 |
| GOTERM_MF_DIRECT                           | GO:0001078~transcription<br>al repressor activity, RNA<br>polymerase II core<br>promoter proximal region | 4     | 0.898876404 | 0.23087  | 7426          | 387         | 75           | 17446              | 2.404272179 | 1          | 0.90618798 | 7426       | 5          | 9 |
| GOTERM_MF_DIRECT                           | GO:0008134~transcription<br>factor binding                                                               | 5     | 1.123595506 | 0.31961  | 9653          | 387         | 129          | 17446              | 1.747290828 | 1          | 0.95867692 | 9653       | 3          | 1 |
| GOTERM_MF_DIRECT                           | GO:0003690~double-<br>stranded DNA binding                                                               | 10    | 2.247191011 | 0.34611  | 5218          | 387         | 342          | 17446              | 1.318131677 | 1          | 0.96429221 | 5218       | 6          | 5 |
| GOTERM_MF_DIRECT                           |                                                                                                          | 4     | 0.898876404 | 0.58223  | 1336          | 387         | 136          | 17446              | 1.325885393 | 1          | 0.99538972 | 1336       | 2          | 7 |

**Table S1B: Go term analysis of genes expressed in the whole muscle but not in the myofiber**

|                                             |                                                                       |       |             | 0.99827 |            |          |           |                 |             | 0.99999990 |            |            |
|---------------------------------------------|-----------------------------------------------------------------------|-------|-------------|---------|------------|----------|-----------|-----------------|-------------|------------|------------|------------|
| GOTERM_CC_DIRECT                            | GO:0005730~nucleolus                                                  | 9     | 2.02247191  | 1409    | 431        | 842      | 19662     | 0.487619247     | 1           | 5          | 100        |            |
| <b>Annotation Cluster 37</b>                |                                                                       |       |             |         |            |          |           |                 |             |            |            |            |
| <b>Enrichment Score: 1.1034380306263285</b> |                                                                       |       |             |         |            |          |           |                 |             |            |            |            |
| Category                                    | Term                                                                  | Count | %           | PValue  | List Total | Pop Hits | Pop Total | Fold Enrichment | Bonferroni  | Benjamini  | FDR        |            |
| GOTERM_BP_DIRECT                            | GO:0038083~peptidyl-tyrosine autophosphorylation                      | 5     | 1.123595506 | 0.01306 | 7194       | 406      | 41        | 18082           | 5.431334855 | 1          | 0.33358766 | 20.3715044 |
| INTERPRO                                    | IPR000980:SH2 domain                                                  | 7     | 1.573033708 | 0.03220 | 1913       | 434      | 113       | 20594           | 2.939480445 | 1          | 0.38265723 | 39.3983189 |
| UP_KEYWORDS                                 | SH2 domain                                                            | 6     | 1.348314607 | 0.05554 | 679        | 445      | 105       | 22680           | 2.912359551 | 11         | 0.24409055 | 53.1069016 |
| UP_SEQ_FEATURE                              | domain:SH2                                                            | 6     | 1.348314607 | 0.05665 | 5555       | 402      | 93        | 18012           | 2.890707752 | 1          | 0.76780504 | 61.7547296 |
| GOTERM_CC_DIRECT                            | GO:0031234~extrinsic component of cytoplasmic side of plasma membrane | 5     | 1.123595506 | 0.06163 | 417        | 431      | 68        | 19662           | 3.354374232 | 0.9999999  | 0.33822079 | 57.3539856 |
| GOTERM_MF_DIRECT                            | GO:0004715~non-membrane spanning protein tyrosine kinase activity     | 4     | 0.898876404 | 0.07718 | 5077       | 387      | 45        | 17446           | 4.007120299 | 1          | 0.6680148  | 69.4999434 |
| SMART                                       | SM00252:SH2                                                           | 5     | 1.123595506 | 0.30181 | 5192       | 282      | 103       | 10425           | 1.794567238 | 1          | 0.85028266 | 98.8269492 |
| SMART                                       | SM00326:SH3                                                           | 5     | 1.123595506 | 0.78240 | 9784       | 282      | 197       | 10425           | 0.938276272 | 1          | 0.99858645 | 99.9999993 |
| <b>Annotation Cluster 38</b>                |                                                                       |       |             |         |            |          |           |                 |             |            |            |            |
| <b>Enrichment Score: 1.0767404003528633</b> |                                                                       |       |             |         |            |          |           |                 |             |            |            |            |
| Category                                    | Term                                                                  | Count | %           | PValue  | List Total | Pop Hits | Pop Total | Fold Enrichment | Bonferroni  | Benjamini  | FDR        |            |
| INTERPRO                                    | IPR013128:Peptidase C1A, papain                                       | 4     | 0.898876404 | 0.01857 | 2915       | 434      | 27        | 20594           | 7.029868578 | 0.9999995  | 0.28859114 | 24.9388329 |
| INTERPRO                                    | IPR013201:Proteinase inhibitor I29, cathepsin propeptide              | 3     | 0.674157303 | 0.05959 | 7986       | 434      | 19        | 20594           | 7.492359932 | 1          | 0.53885572 | 60.9468794 |



**Table S1B: Go term analysis of genes expressed in the whole muscle but not in the myofiber**

|                  |                                                     |   |             |         |      |     |     |       |             |    |            |            |
|------------------|-----------------------------------------------------|---|-------------|---------|------|-----|-----|-------|-------------|----|------------|------------|
| INTERPRO         | IPR025660:Cysteine peptidase, histidine active site | 3 | 0.674157303 | 0.07122 | 4775 | 434 | 21  | 20594 | 6.778801843 | 1  | 3          | 67.716358  |
| INTERPRO         | IPR000668:Peptidase C1A, papain C-terminal          | 3 | 0.674157303 | 0.08351 | 2869 | 434 | 23  | 20594 | 6.189340813 | 1  | 7          | 73.6685683 |
| SMART            | SM00848:SM00848                                     | 3 | 0.674157303 | 0.09166 | 763  | 282 | 19  | 10425 | 5.837066069 | 81 | 0.52341877 | 69.5681531 |
| SMART            | SM00645:Pept_C1                                     | 3 | 0.674157303 | 0.12658 | 6655 | 282 | 23  | 10425 | 4.821924144 | 1  | 4          | 81.2645420 |
| GOTERM_MF_DIRECT | GO:0008234~cysteine-type peptidase activity         | 5 | 1.123595506 | 0.37994 | 1835 | 387 | 141 | 17446 | 1.598585226 | 1  | 6          | 99.9145727 |

| Annotation Cluster 39               |                                                         |       |             |         |            |          |           |                 |             |           |            |
|-------------------------------------|---------------------------------------------------------|-------|-------------|---------|------------|----------|-----------|-----------------|-------------|-----------|------------|
| Enrichment Score: 1.067087143462728 |                                                         |       |             |         |            |          |           |                 |             |           |            |
| Category                            | Term                                                    | Count | %           | PValue  | List Total | Pop Hits | Pop Total | Fold Enrichment | Bonferroni  | Benjamini | FDR        |
| INTERPRO                            | IPR017983:GPCR, family 2, secretin-like, conserved site | 4     | 0.898876404 | 0.02684 | 1998       | 434      | 31        | 20594           | 6.122788762 | 0.9999999 | 34.0542264 |
| INTERPRO                            | IPR000203:GPS domain                                    | 4     | 0.898876404 | 0.02916 | 8827       | 434      | 32        | 20594           | 5.931451613 | 1         | 0.34076055 |
| SMART                               | SM00303:GPS                                             | 4     | 0.898876404 | 0.04603 | 5766       | 282      | 30        | 10425           | 4.929078014 | 0.9998365 | 36.4261116 |
| INTERPRO                            | IPR000832:GPCR, family 2, secretin-like                 | 4     | 0.898876404 | 0.07218 | 9209       | 434      | 46        | 20594           | 4.126227209 | 3         | 0.35892557 |
| INTERPRO                            | IPR017981:GPCR, family 2-like                           | 4     | 0.898876404 | 0.12267 | 4724       | 434      | 58        | 20594           | 3.272525028 | 1         | 0.36801435 |
| UP_SEQ_FEATURE                      | domain:GPS                                              | 3     | 0.674157303 | 0.15105 | 3693       | 402      | 31        | 18012           | 4.336061627 | 1         | 4          |
| GOTERM_MF_DIRECT                    | GO:0004888~transmembrane signaling receptor activity    | 7     | 1.573033708 | 0.70339 | 9546       | 387      | 316       | 17446           | 0.998609885 | 1         | 0.59354506 |

| Annotation Cluster 40               |      |       |   |        |            |          |           |                 |            |           |     |
|-------------------------------------|------|-------|---|--------|------------|----------|-----------|-----------------|------------|-----------|-----|
| Enrichment Score: 1.003615687057064 |      |       |   |        |            |          |           |                 |            |           |     |
| Category                            | Term | Count | % | PValue | List Total | Pop Hits | Pop Total | Fold Enrichment | Bonferroni | Benjamini | FDR |

**Table S1B: Go term analysis of genes expressed in the whole muscle but not in the myofiber**

| GOTERM_BP_DIRECT                            | GO:0050830~defense response to Gram-positive bacterium | 7     | 1.573033708 | 0.01812  | 8651       | 406      | 93        | 18082           | 3.352243233 | 1          | 0.40100402 | 27.1556390 |
|---------------------------------------------|--------------------------------------------------------|-------|-------------|----------|------------|----------|-----------|-----------------|-------------|------------|------------|------------|
| GOTERM_BP_DIRECT                            | GO:0050829~defense response to Gram-negative bacterium | 4     | 0.898876404 | 0.13030  | 6537       | 406      | 56        | 18082           | 3.181210415 | 1          | 0.87125551 | 91.0894876 |
| UP_KEYWORDS                                 | Antimicrobial                                          | 4     | 0.898876404 | 0.41287  | 7527       | 445      | 119       | 22680           | 1.713152677 | 1          | 0.75029825 | 99.9138297 |
| <b>Annotation Cluster 41</b>                |                                                        |       |             |          |            |          |           |                 |             |            |            |            |
| <b>Enrichment Score: 1.001968264227595</b>  |                                                        |       |             |          |            |          |           |                 |             |            |            |            |
| Category                                    | Term                                                   | Count | %           | PValue   | List Total | Pop Hits | Pop Total | Fold Enrichment | Bonferroni  | Benjamini  | FDR        |            |
| GOTERM_BP_DIRECT                            | GO:0006898~receptor-mediated endocytosis               | 6     | 1.348314607 | 0.01095  | 6572       | 406      | 60        | 18082           | 4.453694581 | 1          | 0.30291668 | 17.3702625 |
| GOTERM_BP_DIRECT                            | GO:0006897~endocytosis                                 | 7     | 1.573033708 | 0.22087  | 5841       | 406      | 181       | 18082           | 1.722423319 | 1          | 0.95446792 | 98.6733066 |
| UP_KEYWORDS                                 | Endocytosis                                            | 4     | 0.898876404 | 0.40763  | 5774       | 445      | 118       | 22680           | 1.72767092  | 1          | 0.74765608 | 99.9030587 |
| <b>Annotation Cluster 42</b>                |                                                        |       |             |          |            |          |           |                 |             |            |            |            |
| <b>Enrichment Score: 1.0018184126016334</b> |                                                        |       |             |          |            |          |           |                 |             |            |            |            |
| Category                                    | Term                                                   | Count | %           | PValue   | List Total | Pop Hits | Pop Total | Fold Enrichment | Bonferroni  | Benjamini  | FDR        |            |
| GOTERM_BP_DIRECT                            | GO:0017144~drug metabolic process                      | 5     | 1.123595506 | 5.91E-04 | 406        | 18       | 18082     | 12.37137384     | 0.7162074   | 0.03981510 | 1.01933854 |            |
| KEGG_PATHWAY                                | mmu00982:Drug metabolism - cytochrome P450             | 5     | 1.123595506 | 0.07277  | 2809       | 185      | 7691      | 3.149467649     | 0.9999996   | 0.44698172 | 61.0889142 |            |
| GOTERM_MF_DIRECT                            | GO:0004497~monooxygenase activity                      | 5     | 1.123595506 | 0.21723  | 9229       | 387      | 17446     | 2.087041822     | 1           | 0.89369721 | 97.3235879 |            |
| UP_KEYWORDS                                 | Microsome                                              | 5     | 1.123595506 | 0.25936  | 5294       | 445      | 132       | 22680           | 1.930541369 | 1          | 0.60821299 | 98.1289486 |
| UP_KEYWORDS                                 | Monooxygenase                                          | 5     | 1.123595506 | 0.26366  | 9814       | 445      | 133       | 22680           | 1.91602602  | 1          | 0.61126028 | 98.2680287 |
| GOTERM_CC_DIRECT                            | GO:0031090~organelle membrane                          | 4     | 0.898876404 | 0.33858  | 6084       | 431      | 94        | 19662           | 1.941254875 | 1          | 0.77708093 | 99.6065087 |

**Table S1B: Go term analysis of genes expressed in the whole muscle but not in the myofiber**

|             |      |   |             |                 |     |     |       |             |   |                 |                 |
|-------------|------|---|-------------|-----------------|-----|-----|-------|-------------|---|-----------------|-----------------|
| UP_KEYWORDS | NADP | 5 | 1.123595506 | 0.44856<br>3813 | 445 | 175 | 22680 | 1.456179775 | 1 | 0.78192770<br>7 | 99.9624613<br>2 |
|-------------|------|---|-------------|-----------------|-----|-----|-------|-------------|---|-----------------|-----------------|

---

\* GO term analysis of genes not expressed in the myofiber but found in the whole muscle, defined as having a reads per million (RPM) value equal to or greater than 10 in the whole muscle and 0 in the single myofiber. We Used DAVID 6.8 online functional annotation tool with the ENSEMBL\_GENE\_ID identifier and with a classification stringency of medium (1).

**Table S2A: List of genes expressed solely in the myofiber**

| Gene ID            | Gene Name                                                                                  |
|--------------------|--------------------------------------------------------------------------------------------|
| ENSMUSG00000029314 | 1-acylglycerol-3-phosphate O-acyltransferase 9(Agpat9)                                     |
| ENSMUSG00000054027 | 5'-nucleotidase domain containing 3(Nt5dc3)                                                |
| ENSMUSG00000025648 | 6-phosphofructo-2-kinase/fructose-2,6-biphosphatase 4(Pfkfb4)                              |
| ENSMUSG00000040407 | A kinase (PRKA) anchor protein (yotiao) 9(Akap9)                                           |
| ENSMUSG00000031448 | ADP-ribosylhydrolase like 1(Adprhl1)                                                       |
| ENSMUSG00000030996 | ADP-ribosyltransferase 1(Art1)                                                             |
| ENSMUSG00000029313 | AF4/FMR2 family, member 1(Aff1)                                                            |
| ENSMUSG00000019947 | AT rich interactive domain 5B (MRF1-like)(Arid5b)                                          |
| ENSMUSG00000064357 | ATP synthase F0 subunit 6(ATP6)                                                            |
| ENSMUSG00000022956 | ATP synthase, H <sup>+</sup> transporting, mitochondrial F1 complex, O subunit(Atp5o)      |
| ENSMUSG00000050856 | ATP synthase, H <sup>+</sup> transporting, mitochondrial F1F0 complex, subunit E(Atp5k)    |
| ENSMUSG00000030249 | ATP-binding cassette, sub-family C (CFTR/MRP), member 9(Abcc9)                             |
| ENSMUSG00000019943 | ATPase, Ca <sup>++</sup> transporting, plasma membrane 1(Atp2b1)                           |
| ENSMUSG00000007097 | ATPase, Na <sup>+</sup> /K <sup>+</sup> transporting, alpha 2 polypeptide(Atp1a2)          |
| ENSMUSG00000037685 | ATPase, aminophospholipid transporter (APLT), class I, type 8A, member 1(Atp8a1)           |
| ENSMUSG00000061132 | B cell linker(Blnk)                                                                        |
| ENSMUSG00000020423 | B cell translocation gene 2, anti-proliferative(Btg2)                                      |
| ENSMUSG00000049658 | B double prime 1, subunit of RNA polymerase III transcription initiation factor IIIB(Bdp1) |
| ENSMUSG00000025612 | BTB and CNC homology 1, basic leucine zipper transcription factor 1(Bach1)                 |
| ENSMUSG00000040794 | C1q and tumor necrosis factor related protein 4(C1qtnf4)                                   |
| ENSMUSG00000024059 | CAP-GLY domain containing linker protein family, member 4(Clip4)                           |
| ENSMUSG00000071637 | CCAAT/enhancer binding protein (C/EBP), delta(Cebpd)                                       |
| ENSMUSG00000046186 | CD109 antigen(Cd109)                                                                       |
| ENSMUSG00000047139 | CD24a antigen(Cd24a)                                                                       |
| ENSMUSG00000004096 | CWC15 spliceosome-associated protein(Cwc15)                                                |
| ENSMUSG00000027313 | ChaC, cation transport regulator 1(Chac1)                                                  |
| ENSMUSG00000020075 | DEAD (Asp-Glu-Ala-Asp) box polypeptide 21(Ddx21)                                           |
| ENSMUSG00000020719 | DEAD (Asp-Glu-Ala-Asp) box polypeptide 5(Ddx5)                                             |
| ENSMUSG00000032097 | DEAD (Asp-Glu-Ala-Asp) box polypeptide 6(Ddx6)                                             |
| ENSMUSG00000000787 | DEAD/H (Asp-Glu-Ala-Asp/His) box polypeptide 3, X-linked(Ddx3x)                            |
| ENSMUSG00000019362 | DNA segment, Chr 8, ERATO Doi 738, expressed(D8ErtD738e)                                   |
| ENSMUSG00000025408 | DNA-damage inducible transcript 3(Ddit3)                                                   |
| ENSMUSG00000061589 | DOT1-like, histone H3 methyltransferase ( <i>S. cerevisiae</i> )(Dot1l)                    |
| ENSMUSG00000014905 | DnaJ heat shock protein family (Hsp40) member B9(Dnajb9)                                   |
| ENSMUSG00000032560 | DnaJ heat shock protein family (Hsp40) member C13(Dnajc13)                                 |
| ENSMUSG00000028967 | ERBB receptor feedback inhibitor 1(Errfi1)                                                 |
| ENSMUSG00000025932 | EYA transcriptional coactivator and phosphatase 1(Eya1)                                    |
| ENSMUSG00000047648 | F-box protein 30(Fbxo30)                                                                   |

**Table S2A: List of genes expressed solely in the myofiber**

| Gene ID             | Gene Name                                                                                      |
|---------------------|------------------------------------------------------------------------------------------------|
| ENSMUSG00000022358  | F-box protein 32(Fbxo32)                                                                       |
| ENSMUSG00000003545  | FBJ osteosarcoma oncogene B(Fosb)                                                              |
| ENSMUSG000000021250 | FBJ osteosarcoma oncogene(Fos)                                                                 |
| ENSMUSG000000038274 | Finkel-Biskis-Reilly murine sarcoma virus (FBR-MuSV) ubiquitously expressed (fox derived)(Fau) |
| ENSMUSG00000028214  | GTP binding protein (gene overexpressed in skeletal muscle)(Gem)                               |
| ENSMUSG000000037580 | GTP cyclohydrolase 1(Gch1)                                                                     |
| ENSMUSG000000016559 | H3 histone, family 3B(H3f3b)                                                                   |
| ENSMUSG000000025261 | HECT, UBA and WWE domain containing 1(Huwe1)                                                   |
| ENSMUSG000000040167 | IKAROS family zinc finger 5(Ikzf5)                                                             |
| ENSMUSG000000034154 | INO80 complex subunit(Ino80)                                                                   |
| ENSMUSG000000028530 | Janus kinase 1(Jak1)                                                                           |
| ENSMUSG000000101609 | KCNQ1 overlapping transcript 1(Kcnq1ot1)                                                       |
| ENSMUSG000000018476 | KDM1 lysine (K)-specific demethylase 6B(Kdm6b)                                                 |
| ENSMUSG000000003032 | Kruppel-like factor 4 (gut)(Klf4)                                                              |
| ENSMUSG000000005148 | Kruppel-like factor 5(Klf5)                                                                    |
| ENSMUSG000000000078 | Kruppel-like factor 6(Klf6)                                                                    |
| ENSMUSG000000055553 | KxDL motif containing 1(Kxd1)                                                                  |
| ENSMUSG000000037736 | LIM and calponin homology domains 1(Limch1)                                                    |
| ENSMUSG000000016239 | LON peptidase N-terminal domain and ring finger 3                                              |
| ENSMUSG000000039108 | LSM family member 14B(Lsm14b)                                                                  |
| ENSMUSG000000029823 | LUC7-like 2 (S. cerevisiae)(Luc7l2)                                                            |
| ENSMUSG000000033499 | La ribonucleoprotein domain family, member 4B(Larp4b)                                          |
| ENSMUSG000000032688 | MALT1 paracaspase(Malt1)                                                                       |
| ENSMUSG000000006024 | N-ethylmaleimide sensitive fusion protein attachment protein alpha(Napa)                       |
| ENSMUSG000000027438 | N-ethylmaleimide sensitive fusion protein attachment protein beta(Napb)                        |
| ENSMUSG000000020936 | N-myristoyltransferase 1(Nmt1)                                                                 |
| ENSMUSG000000078572 | NADH dehydrogenase (ubiquinone) 1 alpha subcomplex assembly factor 8(Ndufaf8)                  |
| ENSMUSG000000036199 | NADH dehydrogenase (ubiquinone) 1 alpha subcomplex, 13(Ndufa13)                                |
| ENSMUSG000000014294 | NADH dehydrogenase (ubiquinone) 1 alpha subcomplex, 2(Ndufa2)                                  |
| ENSMUSG000000035674 | NADH dehydrogenase (ubiquinone) 1 alpha subcomplex, 3(Ndufa3)                                  |
| ENSMUSG000000022450 | NADH dehydrogenase (ubiquinone) 1 alpha subcomplex, 6 (B14)(Ndufa6)                            |
| ENSMUSG000000041881 | NADH dehydrogenase (ubiquinone) 1 alpha subcomplex, 7 (B14.5a)(Ndufa7)                         |
| ENSMUSG000000037152 | NADH dehydrogenase (ubiquinone) 1, subcomplex unknown, 1(Ndufc1)                               |
| ENSMUSG000000024038 | NADH dehydrogenase (ubiquinone) flavoprotein 3(Ndufv3)                                         |
| ENSMUSG000000064341 | NADH dehydrogenase subunit 1(ND1)                                                              |
| ENSMUSG000000064345 | NADH dehydrogenase subunit 2(ND2)                                                              |
| ENSMUSG000000064363 | NADH dehydrogenase subunit 4(ND4)                                                              |

**Table S2A: List of genes expressed solely in the myofiber**

| Gene ID            | Gene Name                                                     |
|--------------------|---------------------------------------------------------------|
| ENSMUSG00000064368 | NADH dehydrogenase subunit 6(ND6)                             |
| ENSMUSG00000001056 | NHP2 ribonucleoprotein(Nhp2)                                  |
| ENSMUSG00000026020 | NOP58 ribonucleoprotein(Nop58)                                |
| ENSMUSG00000024413 | Niemann-Pick type C1(Npc1)                                    |
| ENSMUSG00000022141 | Nipped-B homolog (Drosophila)(Nipbl)                          |
| ENSMUSG00000043415 | OTU domain containing 1(Otud1)                                |
| ENSMUSG00000027108 | Obg-like ATPase 1(Ola1)                                       |
| ENSMUSG00000021493 | PDZ and LIM domain 7(Pdlim7)                                  |
| ENSMUSG00000025340 | RAB guanine nucleotide exchange factor (GEF) 1(Rabgef1)       |
| ENSMUSG00000031504 | RAB20, member RAS oncogene family(Rab20)                      |
| ENSMUSG00000020132 | RAB21, member RAS oncogene family(Rab21)                      |
| ENSMUSG00000039318 | RAB3 GTPase activating protein subunit 2(Rab3gap2)            |
| ENSMUSG00000030643 | RAB30, member RAS oncogene family(Rab30)                      |
| ENSMUSG00000064147 | RAB44, member RAS oncogene family(Rab44)                      |
| ENSMUSG00000003226 | RAN binding protein 2(Ranbp2)                                 |
| ENSMUSG00000032238 | RAR-related orphan receptor alpha(Rora)                       |
| ENSMUSG00000043644 | RIKEN cDNA 0610009L18 gene(0610009L18Rik)                     |
| ENSMUSG00000039195 | RIKEN cDNA 1110008P14 gene(1110008P14Rik)                     |
| ENSMUSG00000022507 | RIKEN cDNA 1810013L24 gene(1810013L24Rik)                     |
| ENSMUSG00000021458 | RIKEN cDNA 2010111I01 gene(2010111I01Rik)                     |
| ENSMUSG00000028396 | RIKEN cDNA 2310002L09 gene(2310002L09Rik)                     |
| ENSMUSG00000079283 | RIKEN cDNA 2310009B15 gene(2310009B15Rik)                     |
| ENSMUSG00000062619 | RIKEN cDNA 2310039H08 gene(2310039H08Rik)                     |
| ENSMUSG00000058833 | RIKEN cDNA 2810428I15 gene(2810428I15Rik)                     |
| ENSMUSG00000036046 | RIKEN cDNA 5031439G07 gene(5031439G07Rik)                     |
| ENSMUSG00000048109 | RNA binding motif protein 15(Rbm15)                           |
| ENSMUSG00000008658 | RNA binding protein, fox-1 homolog (C. elegans) 1(Rbfox1)     |
| ENSMUSG00000019782 | RWD domain containing 1(Rwdd1)                                |
| ENSMUSG00000038975 | Rab geranylgeranyl transferase, b subunit(Rabggtb)            |
| ENSMUSG00000019854 | RalBP1 associated Eps domain containing protein(Reps1)        |
| ENSMUSG00000039844 | Rap guanine nucleotide exchange factor (GEF) 1(Rapgef1)       |
| ENSMUSG00000037533 | Rap guanine nucleotide exchange factor (GEF) 6(Rapgef6)       |
| ENSMUSG00000031880 | Ras-related associated with diabetes(Rrad)                    |
| ENSMUSG00000020580 | Rho-associated coiled-coil containing protein kinase 2(Rock2) |
| ENSMUSG00000078974 | SEC61, gamma subunit(Sec61g)                                  |
| ENSMUSG00000008384 | SERTA domain containing 1(Sertad1)                            |
| ENSMUSG00000037111 | SET domain containing (lysine methyltransferase) 7(Setd7)     |
| ENSMUSG00000054766 | SET nuclear oncogene(Set)                                     |

**Table S2A: List of genes expressed solely in the myofiber**

| Gene ID            | Gene Name                                                                                              |
|--------------------|--------------------------------------------------------------------------------------------------------|
| ENSMUSG00000027660 | SKI-like(Skil)                                                                                         |
| ENSMUSG00000024515 | SMAD family member 4(Smad4)                                                                            |
| ENSMUSG00000030655 | SMG1 homolog, phosphatidylinositol 3-kinase-related kinase (C. elegans)(Smg1)                          |
| ENSMUSG00000026207 | SPEG complex locus(Speg)                                                                               |
| ENSMUSG00000051910 | SRY (sex determining region Y)-box 6(Sox6)                                                             |
| ENSMUSG00000000567 | SRY (sex determining region Y)-box 9(Sox9)                                                             |
| ENSMUSG00000036391 | Sec24 related gene family, member A (S. cerevisiae)(Sec24a)                                            |
| ENSMUSG00000049323 | Smith-Magenis syndrome chromosome region, candidate 8 homolog (human)(Smcr8)                           |
| ENSMUSG00000022961 | Son DNA binding protein(Son)                                                                           |
| ENSMUSG00000054321 | TATA-box binding protein associated factor 4b(Taf4b)                                                   |
| ENSMUSG00000031939 | TATA-box binding protein associated factor, RNA polymerase I, D(Taf1d)                                 |
| ENSMUSG00000029174 | TBC1 domain family, member 1(Tbc1d1)                                                                   |
| ENSMUSG00000034640 | TCDD-inducible poly(ADP-ribose) polymerase(Tiparp)                                                     |
| ENSMUSG00000055320 | TEA domain family member 1(Tead1)                                                                      |
| ENSMUSG00000015755 | TGF-beta activated kinase 1/MAP3K7 binding protein 2(Tab2)                                             |
| ENSMUSG00000047407 | TGFB-induced factor homeobox 1(Tgif1)                                                                  |
| ENSMUSG00000027692 | TRAF2 and NCK interacting kinase(Tnik)                                                                 |
| ENSMUSG00000028381 | UDP-glucose ceramide glucosyltransferase(Ugcg)                                                         |
| ENSMUSG00000037470 | UDP-glucose glycoprotein glucosyltransferase 1(Uggt1)                                                  |
| ENSMUSG00000034216 | VPS18 CORVET/HOPS core subunit(Vps18)                                                                  |
| ENSMUSG00000020128 | VPS54 GARP complex subunit(Vps54)                                                                      |
| ENSMUSG00000073643 | WD repeat and FYVE domain containing 1(Wdfy1)                                                          |
| ENSMUSG00000038733 | WD repeat domain 26(Wdr26)                                                                             |
| ENSMUSG00000030189 | Y box protein 3(Ybx3)                                                                                  |
| ENSMUSG00000022893 | a disintegrin-like and metallopeptidase (reprolysin type) with thrombospondin type 1 motif, 1(Adamts1) |
| ENSMUSG00000031972 | actin, alpha 1, skeletal muscle(Acta1)                                                                 |
| ENSMUSG00000038774 | activating signal cointegrator 1 complex subunit 3(Ascc3)                                              |
| ENSMUSG00000026628 | activating transcription factor 3(Atf3)                                                                |
| ENSMUSG00000042406 | activating transcription factor 4(Atf4)                                                                |
| ENSMUSG00000026663 | activating transcription factor 6(Atf6)                                                                |
| ENSMUSG00000022602 | activity regulated cytoskeletal-associated protein(Arc)                                                |
| ENSMUSG00000005686 | adenosine monophosphate deaminase 3(Ampd3)                                                             |
| ENSMUSG00000021536 | adenylate cyclase 2(Adcy2)                                                                             |
| ENSMUSG00000030168 | adiponectin receptor 2(Adipor2)                                                                        |
| ENSMUSG00000030695 | aldolase A, fructose-bisphosphate(Aldoa)                                                               |
| ENSMUSG00000032845 | alpha-kinase 2(Alpk2)                                                                                  |
| ENSMUSG00000028029 | aminoacyl tRNA synthetase complex-interacting multifunctional protein 1(Aimp1)                         |

**Table S2A: List of genes expressed solely in the myofiber**

| Gene ID            | Gene Name                                                                     |
|--------------------|-------------------------------------------------------------------------------|
| ENSMUSG00000035048 | anaphase promoting complex subunit 13(Anapc13)                                |
| ENSMUSG00000041688 | angiomin(Amot)                                                                |
| ENSMUSG00000013076 | angiomin-like 1(Amotl1)                                                       |
| ENSMUSG00000031980 | angiotensinogen (serpin peptidase inhibitor, clade A, member 8)(Agt)          |
| ENSMUSG00000069601 | ankyrin 3, epithelial(Ank3)                                                   |
| ENSMUSG00000034768 | ankyrin repeat and SOCS box-containing 16(Asb16)                              |
| ENSMUSG00000024803 | ankyrin repeat domain 1 (cardiac muscle)(Ankrd1)                              |
| ENSMUSG00000035569 | ankyrin repeat domain 11(Ankrd11)                                             |
| ENSMUSG00000014496 | ankyrin repeat domain 28(Ankrd28)                                             |
| ENSMUSG00000022237 | ankyrin repeat domain 33B(Ankrd33b)                                           |
| ENSMUSG00000055489 | anoctamin 5(Ano5)                                                             |
| ENSMUSG00000020610 | archaelysin family metalloproteinase 2(Amz2)                                  |
| ENSMUSG00000040459 | arginine and glutamate rich 1(Arglu1)                                         |
| ENSMUSG00000036698 | argonaut RISC catalytic subunit 2(Ago2)                                       |
| ENSMUSG00000074794 | arrestin domain containing 3(Arrdc3)                                          |
| ENSMUSG00000024587 | asparaginyl-tRNA synthetase(Nars)                                             |
| ENSMUSG00000055435 | avian musculoaponeurotic fibrosarcoma oncogene homolog(Maf)                   |
| ENSMUSG00000030103 | basic helix-loop-helix family, member e40(Bhlhe40)                            |
| ENSMUSG00000047721 | bolA-like 2 (E. coli)(Bola2)                                                  |
| ENSMUSG00000067336 | bone morphogenetic protein receptor, type II (serine/threonine kinase)(Bmpr2) |
| ENSMUSG00000050071 | brain expressed X-linked 1(Bex1)                                              |
| ENSMUSG00000025372 | brain-specific angiogenesis inhibitor 1-associated protein 2(Baiap2)          |
| ENSMUSG00000040481 | bromodomain PHD finger transcription factor(Bptf)                             |
| ENSMUSG00000024335 | bromodomain containing 2(Brd2)                                                |
| ENSMUSG00000019132 | cDNA sequence BC005537(BC005537)                                              |
| ENSMUSG00000022235 | carboxymethylglutaminase-like (Pseudomonas)(Cmb1)                             |
| ENSMUSG00000068267 | centromere protein B(Cenpb)                                                   |
| ENSMUSG00000034024 | chaperonin containing Tcp1, subunit 2 (beta)(Cct2)                            |
| ENSMUSG00000038467 | charged multivesicular body protein 4B(Chmp4b)                                |
| ENSMUSG00000023959 | chloride intracellular channel 5(Clic5)                                       |
| ENSMUSG00000024843 | choline kinase alpha(Chka)                                                    |
| ENSMUSG00000027107 | cholinergic receptor, nicotinic, alpha polypeptide 1 (muscle)(Chrna1)         |
| ENSMUSG00000047126 | clathrin, heavy polypeptide (Hc)(Cltc)                                        |
| ENSMUSG00000022037 | clusterin(Clu)                                                                |
| ENSMUSG00000025981 | coenzyme Q10B(Coq10b)                                                         |
| ENSMUSG00000007721 | coiled-coil domain containing 124(Ccdc124)                                    |
| ENSMUSG00000048701 | coiled-coil domain containing 6(Ccdc6)                                        |
| ENSMUSG00000024732 | coiled-coil domain containing 86(Ccdc86)                                      |



**Table S2A: List of genes expressed solely in the myofiber**

| Gene ID             | Gene Name                                                                 |
|---------------------|---------------------------------------------------------------------------|
| ENSMUSG00000049422  | coiled-coil-helix-coiled-coil-helix domain containing 10(Chchd10)         |
| ENSMUSG00000028841  | connector enhancer of kinase suppressor of Ras 1(Cnksr1)                  |
| ENSMUSG00000030399  | creatine kinase, muscle(Ckm)                                              |
| ENSMUSG00000032060  | crystallin, alpha B(Cryab)                                                |
| ENSMUSG00000004364  | cullin 3(Cul3)                                                            |
| ENSMUSG00000021258  | cyclin K(Ccnk)                                                            |
| ENSMUSG00000027829  | cyclin L1(Ccnl1)                                                          |
| ENSMUSG00000048895  | cyclin-dependent kinase 5, regulatory subunit 1 (p35)(Cdk5r1)             |
| ENSMUSG00000023067  | cyclin-dependent kinase inhibitor 1A (P21)(Cdkn1a)                        |
| ENSMUSG00000005054  | cystatin B(Cstb)                                                          |
| ENSMUSG00000024846  | cystatin E/M(Cst6)                                                        |
| ENSMUSG00000032515  | cysteine-serine-rich nuclear protein 1(Csrnp1)                            |
| ENSMUSG000000064370 | cytochrome b(CYTB)                                                        |
| ENSMUSG000000064354 | cytochrome c oxidase subunit II(COX2)                                     |
| ENSMUSG000000064358 | cytochrome c oxidase subunit III(COX3)                                    |
| ENSMUSG00000025488  | cytochrome c oxidase subunit VIIIb(Cox8b)                                 |
| ENSMUSG000000074218 | cytochrome c oxidase subunit VIIa 1(Cox7a1)                               |
| ENSMUSG00000030785  | cytochrome c oxidase subunit VIa polypeptide 2(Cox6a2)                    |
| ENSMUSG00000020300  | cytoplasmic polyadenylation element binding protein 4(Cpeb4)              |
| ENSMUSG000000054499 | death effector domain-containing DNA binding protein 2(Dedd2)             |
| ENSMUSG00000023106  | density-regulated protein(Denr)                                           |
| ENSMUSG00000021905  | diphthamine biosynthesis 3(Dph3)                                          |
| ENSMUSG000000034574 | dishevelled associated activator of morphogenesis 1(Daam1)                |
| ENSMUSG000000044716 | docking protein 7(Dok7)                                                   |
| ENSMUSG00000022946  | dopey family member 2(Dopey2)                                             |
| ENSMUSG000000021768 | dual specificity phosphatase 13(Dusp13)                                   |
| ENSMUSG00000027368  | dual specificity phosphatase 2(Dusp2)                                     |
| ENSMUSG000000039661 | dual specificity phosphatase 26 (putative)(Dusp26)                        |
| ENSMUSG000000034765 | dual specificity phosphatase 5(Dusp5)                                     |
| ENSMUSG00000022897  | dual-specificity tyrosine-(Y)-phosphorylation regulated kinase 1a(Dyrk1a) |
| ENSMUSG00000026131  | dystonin(Dst)                                                             |
| ENSMUSG000000045103 | dystrophin, muscular dystrophy(Dmd)                                       |
| ENSMUSG000000038418 | early growth response 1(Egr1)                                             |
| ENSMUSG000000039840 | ectopic P-granules autophagy protein 5 homolog (C. elegans)(Epg5)         |
| ENSMUSG000000001542 | elongation factor RNA polymerase II 2(Ell2)                               |
| ENSMUSG00000022995  | enabled homolog (Drosophila)(Enah)                                        |
| ENSMUSG000000015092 | endothelial differentiation-related factor 1(Edf1)                        |
| ENSMUSG000000096768 | erythroid differentiation regulator 1(Erdr1)                              |

**Table S2A: List of genes expressed solely in the myofiber**

| Gene ID            | Gene Name                                                                      |
|--------------------|--------------------------------------------------------------------------------|
| ENSMUSG00000025967 | eukaryotic translation elongation factor 1 beta 2(Eef1b2)                      |
| ENSMUSG00000071644 | eukaryotic translation elongation factor 1 gamma(Eef1g)                        |
| ENSMUSG00000035530 | eukaryotic translation initiation factor 1(Eif1)                               |
| ENSMUSG00000057561 | eukaryotic translation initiation factor 1A(Eif1a)                             |
| ENSMUSG00000006941 | eukaryotic translation initiation factor 1B(Eif1b)                             |
| ENSMUSG00000074656 | eukaryotic translation initiation factor 2, subunit 2 (beta)(Eif2s2)           |
| ENSMUSG00000024991 | eukaryotic translation initiation factor 3, subunit A(Eif3a)                   |
| ENSMUSG00000030738 | eukaryotic translation initiation factor 3, subunit C(Eif3c)                   |
| ENSMUSG00000031029 | eukaryotic translation initiation factor 3, subunit F(Eif3f)                   |
| ENSMUSG00000070319 | eukaryotic translation initiation factor 3, subunit G(Eif3g)                   |
| ENSMUSG00000022312 | eukaryotic translation initiation factor 3, subunit H(Eif3h)                   |
| ENSMUSG00000027236 | eukaryotic translation initiation factor 3, subunit J1(Eif3j1)                 |
| ENSMUSG00000053565 | eukaryotic translation initiation factor 3, subunit K(Eif3k)                   |
| ENSMUSG00000031490 | eukaryotic translation initiation factor 4E binding protein 1(Eif4ebp1)        |
| ENSMUSG00000021282 | eukaryotic translation initiation factor 5(Eif5)                               |
| ENSMUSG00000026083 | eukaryotic translation initiation factor 5B(Eif5b)                             |
| ENSMUSG00000050812 | expressed sequence AI314180(AI314180)                                          |
| ENSMUSG00000038112 | expressed sequence AW551984(AW551984)                                          |
| ENSMUSG00000038014 | family with sequence similarity 120, member A(Fam120a)                         |
| ENSMUSG00000022270 | family with sequence similarity 134, member B(Fam134b)                         |
| ENSMUSG00000029461 | family with sequence similarity 168, member A(Fam168a)                         |
| ENSMUSG00000045761 | family with sequence similarity 179, member A(Fam179a)                         |
| ENSMUSG00000071604 | family with sequence similarity 189, member A2(Fam189a2)                       |
| ENSMUSG00000032244 | feminization 1 homolog b (C. elegans)(Fem1b)                                   |
| ENSMUSG00000037712 | fermitin family member 2(Fermt2)                                               |
| ENSMUSG00000024661 | ferritin heavy polypeptide 1(Fth1)                                             |
| ENSMUSG00000050708 | ferritin light polypeptide 1(Ftl1)                                             |
| ENSMUSG00000031137 | fibroblast growth factor 13(Fgf13)                                             |
| ENSMUSG00000068699 | filamin C, gamma(Flnc)                                                         |
| ENSMUSG00000035992 | folliculin interacting protein 1(Fnip1)                                        |
| ENSMUSG00000033713 | forkhead box N3(Foxn3)                                                         |
| ENSMUSG00000044167 | forkhead box O1(Foxo1)                                                         |
| ENSMUSG00000034295 | formin homology 2 domain containing 3(Fhod3)                                   |
| ENSMUSG00000032643 | four and a half LIM domains 3(Fhl3)                                            |
| ENSMUSG00000027680 | fragile X mental retardation gene 1, autosomal homolog(Fxr1)                   |
| ENSMUSG00000031266 | galactosidase, alpha(Gla)                                                      |
| ENSMUSG00000030161 | gamma-aminobutyric acid (GABA) A receptor-associated protein-like 1(Gabarapl1) |
| ENSMUSG00000031950 | gamma-aminobutyric acid (GABA) A receptor-associated protein-like 2(Gabarapl2) |

**Table S2A: List of genes expressed solely in the myofiber**

| Gene ID            | Gene Name                                                           |
|--------------------|---------------------------------------------------------------------|
| ENSMUSG00000026473 | glutamate-ammonia ligase (glutamine synthetase)(Glul)               |
| ENSMUSG00000074994 | glutamine and serine rich 1(Qser1)                                  |
| ENSMUSG00000026615 | glutamyl-prolyl-tRNA synthetase(Eprs)                               |
| ENSMUSG00000021591 | glutaredoxin(Glrx)                                                  |
| ENSMUSG00000004032 | glutathione S-transferase, mu 5(Gstm5)                              |
| ENSMUSG00000057666 | glyceraldehyde-3-phosphate dehydrogenase(Gapdh)                     |
| ENSMUSG00000019528 | glycogenin(Gyg)                                                     |
| ENSMUSG00000024026 | glyoxalase 1(Glo1)                                                  |
| ENSMUSG00000038708 | golgi autoantigen, golgin subfamily a, 4(Golga4)                    |
| ENSMUSG00000029708 | golgi coiled coil 1(Gcc1)                                           |
| ENSMUSG00000036390 | growth arrest and DNA-damage-inducible 45 alpha(Gadd45a)            |
| ENSMUSG00000015312 | growth arrest and DNA-damage-inducible 45 beta(Gadd45b)             |
| ENSMUSG00000021453 | growth arrest and DNA-damage-inducible 45 gamma(Gadd45g)            |
| ENSMUSG00000020611 | guanine nucleotide binding protein, alpha 13(Gna13)                 |
| ENSMUSG00000042354 | guanine nucleotide binding protein-like 3 (nucleolar)(Gnl3)         |
| ENSMUSG00000004951 | heat shock protein 1(Hspb1)                                         |
| ENSMUSG00000041548 | heat shock protein 8(Hspb8)                                         |
| ENSMUSG00000023944 | heat shock protein 90 alpha (cytosolic), class B member 1(Hsp90ab1) |
| ENSMUSG00000005413 | heme oxygenase 1(Hmox1)                                             |
| ENSMUSG00000024486 | heparin-binding EGF-like growth factor(Hbegf)                       |
| ENSMUSG00000007836 | heterogeneous nuclear ribonucleoprotein A0(Hnrnpa0)                 |
| ENSMUSG00000029328 | heterogeneous nuclear ribonucleoprotein D-like(Hnrnpdl)             |
| ENSMUSG00000000628 | hexokinase 2(Hk2)                                                   |
| ENSMUSG00000034088 | high density lipoprotein (HDL) binding protein(Hdlbp)               |
| ENSMUSG00000038239 | histidine rich calcium binding protein(Hrc)                         |
| ENSMUSG00000019791 | histidine triad nucleotide binding protein 3(Hint3)                 |
| ENSMUSG00000060639 | histone cluster 1, H4i(Hist1h4i)                                    |
| ENSMUSG00000026313 | histone deacetylase 4(Hdac4)                                        |
| ENSMUSG00000027177 | homeodomain interacting protein kinase 3(Hipk3)                     |
| ENSMUSG00000043421 | hypoxia inducible lipid droplet associated(Hilpda)                  |
| ENSMUSG00000053560 | immediate early response 2(Ier2)                                    |
| ENSMUSG00000056708 | immediate early response 5(Ier5)                                    |
| ENSMUSG00000046879 | immunity-related GTPase family M member 1(Irgm1)                    |
| ENSMUSG00000034275 | immunoglobulin superfamily, member 9B(Igsf9b)                       |
| ENSMUSG00000024423 | impact, RWD domain protein(Impact)                                  |
| ENSMUSG00000030662 | importin 5(Ipo5)                                                    |
| ENSMUSG00000020644 | inhibitor of DNA binding 2(Id2)                                     |
| ENSMUSG00000021385 | inositol 1,3,4,5,6-pentakisphosphate 2-kinase(Ippk)                 |

**Table S2A: List of genes expressed solely in the myofiber**

| Gene ID            | Gene Name                                                              |
|--------------------|------------------------------------------------------------------------|
| ENSMUSG00000038894 | insulin receptor substrate 2(Irs2)                                     |
| ENSMUSG00000005534 | insulin receptor(Insr)                                                 |
| ENSMUSG00000033581 | insulin-like growth factor 2 mRNA binding protein 2(Igf2bp2)           |
| ENSMUSG00000005533 | insulin-like growth factor I receptor(Igf1r)                           |
| ENSMUSG00000027009 | integrin alpha 4(Itga4)                                                |
| ENSMUSG00000078853 | interferon gamma induced GTPase(Igtp)                                  |
| ENSMUSG00000051495 | interferon regulatory factor 2 binding protein 2(Irf2bp2)              |
| ENSMUSG00000041515 | interferon regulatory factor 8(Irf8)                                   |
| ENSMUSG00000001627 | interferon-related developmental regulator 1(Ifrd1)                    |
| ENSMUSG00000023206 | interleukin 15 receptor, alpha chain(Il15ra)                           |
| ENSMUSG00000037851 | isoleucine-tRNA synthetase(lars)                                       |
| ENSMUSG00000037876 | jumonji domain containing 1C(Jmjd1c)                                   |
| ENSMUSG00000038518 | jumonji, AT rich interactive domain 2(Jarid2)                          |
| ENSMUSG00000052837 | jun B proto-oncogene(Junb)                                             |
| ENSMUSG00000073700 | kelch-like 21(Klhl21)                                                  |
| ENSMUSG00000026308 | kelch-like 30(Klhl30)                                                  |
| ENSMUSG00000074001 | kelch-like 40(Klhl40)                                                  |
| ENSMUSG00000075307 | kelch-like 41(Klhl41)                                                  |
| ENSMUSG00000042747 | keratinocyte associated protein 2(Krtcap2)                             |
| ENSMUSG00000018334 | kinase suppressor of ras 1(Ksr1)                                       |
| ENSMUSG00000021843 | kinectin 1(Ktn1)                                                       |
| ENSMUSG00000020821 | kinesin family member 1C(Kif1c)                                        |
| ENSMUSG00000022629 | kinesin family member 21A(Kif21a)                                      |
| ENSMUSG00000032497 | leucine rich repeat (in FLII) interacting protein 2(Lrrfip2)           |
| ENSMUSG00000045776 | leucine-rich repeats and transmembrane domains 1(Lrtm1)                |
| ENSMUSG00000044471 | long non-protein coding RNA, Trp53 induced transcript(Lncpint)         |
| ENSMUSG00000030201 | low density lipoprotein receptor-related protein 6(Lrp6)               |
| ENSMUSG00000031948 | lysyl-tRNA synthetase(Kars)                                            |
| ENSMUSG00000033307 | macrophage migration inhibitory factor(Mif)                            |
| ENSMUSG00000024085 | mannosidase 2, alpha 1(Man2a1)                                         |
| ENSMUSG00000038886 | mannosidase 2, alpha 2(Man2a2)                                         |
| ENSMUSG00000034297 | mediator complex subunit 13(Med13)                                     |
| ENSMUSG00000021112 | membrane protein, palmitoylated 5 (MAGUK p55 subfamily member 5)(Mpp5) |
| ENSMUSG00000039100 | membrane-associated ring finger (C3HC4) 6(March6)                      |
| ENSMUSG00000070576 | meningioma 1(Mn1)                                                      |
| ENSMUSG00000009376 | met proto-oncogene(Met)                                                |
| ENSMUSG00000031765 | metallothionein 1(Mt1)                                                 |
| ENSMUSG00000031762 | metallothionein 2(Mt2)                                                 |

**Table S2A: List of genes expressed solely in the myofiber**

| Gene ID             | Gene Name                                                                                |
|---------------------|------------------------------------------------------------------------------------------|
| ENSMUSG00000031760  | metallothionein 3(Mt3)                                                                   |
| ENSMUSG00000092341  | metastasis associated lung adenocarcinoma transcript 1 (non-coding RNA)(Malat1)          |
| ENSMUSG00000033039  | microtubule associated monooxygenase, calponin and LIM domain containing -like 1(Mical1) |
| ENSMUSG00000051586  | microtubule associated monooxygenase, calponin and LIM domain containing 3(Mical3)       |
| ENSMUSG00000003810  | microtubule associated serine/threonine kinase 2(Mast2)                                  |
| ENSMUSG00000034751  | microtubule associated serine/threonine kinase family member 4(Mast4)                    |
| ENSMUSG00000035621  | midnolin(Midn)                                                                           |
| ENSMUSG00000037772  | mitochondrial ribosomal protein L23(Mrpl23)                                              |
| ENSMUSG00000026087  | mitochondrial ribosomal protein L30(Mrpl30)                                              |
| ENSMUSG00000010406  | mitochondrial ribosomal protein L52(Mrpl52)                                              |
| ENSMUSG00000034932  | mitochondrial ribosomal protein L54(Mrpl54)                                              |
| ENSMUSG000000021967 | mitochondrial ribosomal protein L57(Mrpl57)                                              |
| ENSMUSG00000023967  | mitochondrial ribosomal protein S18A(Mrps18a)                                            |
| ENSMUSG00000054312  | mitochondrial ribosomal protein S21(Mrps21)                                              |
| ENSMUSG000000021936 | mitogen-activated protein kinase 8(Mapk8)                                                |
| ENSMUSG000000024383 | mitogen-activated protein kinase kinase kinase 2(Map3k2)                                 |
| ENSMUSG000000024235 | mitogen-activated protein kinase kinase kinase 8(Map3k8)                                 |
| ENSMUSG000000022671 | mitotic spindle organizing protein 2(Mzt2)                                               |
| ENSMUSG00000069769  | musashi RNA-binding protein 2(Msi2)                                                      |
| ENSMUSG00000028348  | muscle-related coiled-coil protein(Murc)                                                 |
| ENSMUSG00000032355  | muscular LMNA-interacting protein(Mlip)                                                  |
| ENSMUSG000000042485 | musculoskeletal, embryonic nuclear protein 1(Mustn1)                                     |
| ENSMUSG000000022346 | myelocytomatosis oncogene(Myc)                                                           |
| ENSMUSG00000038612  | myeloid cell leukemia sequence 1(Mcl1)                                                   |
| ENSMUSG000000028496 | myeloid/lymphoid or mixed-lineage leukemia; translocated to, 3(Mllt3)                    |
| ENSMUSG00000005583  | myocyte enhancer factor 2C(Mef2c)                                                        |
| ENSMUSG00000009471  | myogenic differentiation 1(Myod1)                                                        |
| ENSMUSG000000024049 | myomesin 1(Myom1)                                                                        |
| ENSMUSG000000020067 | myopalladin(Mypn)                                                                        |
| ENSMUSG000000072720 | myosin XVIIIb(Myo18b)                                                                    |
| ENSMUSG000000020061 | myosin binding protein C, slow-type(Mybpc1)                                              |
| ENSMUSG000000044951 | myosin light chain kinase family, member 4(Mylk4)                                        |
| ENSMUSG000000061816 | myosin, light polypeptide 1(Myl1)                                                        |
| ENSMUSG000000049173 | myozenin 3(Myoz3)                                                                        |
| ENSMUSG000000061315 | nascent polypeptide-associated complex alpha polypeptide(Naca)                           |
| ENSMUSG000000032525 | natural killer tumor recognition sequence(Nktr)                                          |
| ENSMUSG000000026950 | nebulin(Neb)                                                                             |

**Table S2A: List of genes expressed solely in the myofiber**

| Gene ID             | Gene Name                                                                                  |
|---------------------|--------------------------------------------------------------------------------------------|
| ENSMUSG00000049134  | nebulin-related anchoring protein(Nrap)                                                    |
| ENSMUSG00000024589  | neural precursor cell expressed, developmentally down-regulated gene 4-like(Nedd4l)        |
| ENSMUSG00000029361  | nitric oxide synthase 1, neuronal(Nos1)                                                    |
| ENSMUSG00000023087  | nocturnin(Noct)                                                                            |
| ENSMUSG00000014907  | nuclear assembly factor 1 ribonucleoprotein(Naf1)                                          |
| ENSMUSG00000003847  | nuclear factor of activated T cells 5(Nfat5)                                               |
| ENSMUSG000000035356 | nuclear factor of kappa light polypeptide gene enhancer in B cells inhibitor, zeta(Nfkbiz) |
| ENSMUSG000000092274 | nuclear paraspeckle assembly transcript 1 (non-protein coding)(Neat1)                      |
| ENSMUSG00000048490  | nuclear receptor interacting protein 1(Nrip1)                                              |
| ENSMUSG00000023034  | nuclear receptor subfamily 4, group A, member 1(Nr4a1)                                     |
| ENSMUSG00000028341  | nuclear receptor subfamily 4, group A, member 3(Nr4a3)                                     |
| ENSMUSG00000015176  | nucleolar and coiled-body phosphoprotein 1(Nolc1)                                          |
| ENSMUSG000000057113 | nucleophosmin 1(Npm1)                                                                      |
| ENSMUSG00000045211  | nudix (nucleoside diphosphate linked moiety X)-type motif 18(Nudt18)                       |
| ENSMUSG000000061462 | obscurin, cytoskeletal calmodulin and titin-interacting RhoGEF(Obscn)                      |
| ENSMUSG000000026672 | optineurin(Optn)                                                                           |
| ENSMUSG000000074063 | oxidative stress induced growth inhibitor 1(Osgin1)                                        |
| ENSMUSG00000002265  | paternally expressed 3(Peg3)                                                               |
| ENSMUSG00000020893  | period circadian clock 1(Per1)                                                             |
| ENSMUSG000000055866 | period circadian clock 2(Per2)                                                             |
| ENSMUSG000000029167 | peroxisome proliferative activated receptor, gamma, coactivator 1 alpha(Ppargc1a)          |
| ENSMUSG00000040430  | phosphatidylinositol transfer protein, cytoplasmic 1(Pitpnc1)                              |
| ENSMUSG00000028525  | phosphodiesterase 4B, cAMP specific(Pde4b)                                                 |
| ENSMUSG00000038170  | phosphodiesterase 4D interacting protein (myomegalin)(Pde4dip)                             |
| ENSMUSG000000021699 | phosphodiesterase 4D, cAMP specific(Pde4d)                                                 |
| ENSMUSG00000020475  | phosphoglycerate mutase 2(Pgam2)                                                           |
| ENSMUSG00000028917  | pleckstrin homology domain containing, family M (with RUN domain) member 2(Plekhm2)        |
| ENSMUSG00000019817  | pleiomorphic adenoma gene-like 1(Plagl1)                                                   |
| ENSMUSG00000028583  | podoplanin(Pdpn)                                                                           |
| ENSMUSG00000040511  | poliovirus receptor(Pvr)                                                                   |
| ENSMUSG00000022283  | poly(A) binding protein, cytoplasmic 1(Pabpc1)                                             |
| ENSMUSG00000011257  | poly(A) binding protein, cytoplasmic 4(Pabpc4)                                             |
| ENSMUSG000000056851 | poly(rC) binding protein 2(Pcbp2)                                                          |
| ENSMUSG00000029642  | polymerase (RNA) I polypeptide D(Polr1d)                                                   |
| ENSMUSG00000033020  | polymerase (RNA) II (DNA directed) polypeptide F(Polr2f)                                   |
| ENSMUSG00000019738  | polymerase (RNA) II (DNA directed) polypeptide I(Polr2i)                                   |
| ENSMUSG00000031226  | polysaccharide biosynthesis domain containing 1(Pbdc1)                                     |

**Table S2A: List of genes expressed solely in the myofiber**

| Gene ID            | Gene Name                                                                |
|--------------------|--------------------------------------------------------------------------|
| ENSMUSG00000027895 | potassium voltage gated channel, Shaw-related subfamily, member 4(Kcnc4) |
| ENSMUSG00000087006 | predicted gene 13889(Gm13889)                                            |
| ENSMUSG00000041716 | predicted gene 20604(Gm20604)                                            |
| ENSMUSG00000068606 | predicted gene 4841(Gm4841)                                              |
| ENSMUSG00000024346 | prefoldin 1(Pfdn1)                                                       |
| ENSMUSG00000001289 | prefoldin 5(Pfdn5)                                                       |
| ENSMUSG00000030417 | programmed cell death 5(Pdcd5)                                           |
| ENSMUSG00000031485 | proline synthetase co-transcribed(Prosc)                                 |
| ENSMUSG00000039262 | proline-rich coiled-coil 2B(Prrc2b)                                      |
| ENSMUSG00000040225 | proline-rich coiled-coil 2C(Prrc2c)                                      |
| ENSMUSG00000028932 | proteasome (prosome, macropain) 26S subunit, ATPase 2(Psmc2)             |
| ENSMUSG00000040850 | proteasome (prosome, macropain) activator subunit 4(Psme4)               |
| ENSMUSG00000028518 | protein kinase, AMP-activated, alpha 2 catalytic subunit(Prkaa2)         |
| ENSMUSG00000038205 | protein kinase, AMP-activated, beta 2 non-catalytic subunit(Prkb2)       |
| ENSMUSG00000040435 | protein phosphatase 1, regulatory (inhibitor) subunit 15A(Ppp1r15a)      |
| ENSMUSG00000067279 | protein phosphatase 1, regulatory (inhibitor) subunit 3C(Ppp1r3c)        |
| ENSMUSG00000028161 | protein phosphatase 3, catalytic subunit, alpha isoform(Ppp3ca)          |
| ENSMUSG00000021816 | protein phosphatase 3, catalytic subunit, beta isoform(Ppp3cb)           |
| ENSMUSG00000028788 | protein tyrosine phosphatase 4a2(Ptp4a2)                                 |
| ENSMUSG00000036057 | protein tyrosine phosphatase, non-receptor type 23(Ptpn23)               |
| ENSMUSG00000024014 | proviral integration site 1(Pim1)                                        |
| ENSMUSG00000020594 | pumilio RNA-binding family member 2(Pum2)                                |
| ENSMUSG00000062078 | quaking(Qk)                                                              |
| ENSMUSG00000052852 | receptor accessory protein 1(Reep1)                                      |
| ENSMUSG00000020372 | receptor for activated C kinase 1(Rack1)                                 |
| ENSMUSG00000022951 | regulator of calcineurin 1(Rcan1)                                        |
| ENSMUSG00000020275 | reticuloendotheliosis oncogene(Rel)                                      |
| ENSMUSG00000030401 | reticulon 2 (Z-band associated protein)(Rtn2)                            |
| ENSMUSG00000001305 | ribosomal RNA processing 15 homolog (S. cerevisiae)(Rrp15)               |
| ENSMUSG00000008682 | ribosomal protein L10(Rpl10)                                             |
| ENSMUSG00000037805 | ribosomal protein L10A(Rpl10a)                                           |
| ENSMUSG00000059291 | ribosomal protein L11(Rpl11)                                             |
| ENSMUSG00000038900 | ribosomal protein L12(Rpl12)                                             |
| ENSMUSG00000000740 | ribosomal protein L13(Rpl13)                                             |
| ENSMUSG00000025794 | ribosomal protein L14(Rpl14)                                             |
| ENSMUSG00000012405 | ribosomal protein L15(Rpl15)                                             |
| ENSMUSG00000062328 | ribosomal protein L17(Rpl17)                                             |
| ENSMUSG00000059070 | ribosomal protein L18(Rpl18)                                             |

**Table S2A: List of genes expressed solely in the myofiber**

| Gene ID            | Gene Name                             |
|--------------------|---------------------------------------|
| ENSMUSG00000045128 | ribosomal protein L18A(Rpl18a)        |
| ENSMUSG00000017404 | ribosomal protein L19(Rpl19)          |
| ENSMUSG00000041453 | ribosomal protein L21(Rpl21)          |
| ENSMUSG00000039221 | ribosomal protein L22 like 1(Rpl22l1) |
| ENSMUSG00000028936 | ribosomal protein L22(Rpl22)          |
| ENSMUSG00000071415 | ribosomal protein L23(Rpl23)          |
| ENSMUSG00000060938 | ribosomal protein L26(Rpl26)          |
| ENSMUSG00000063316 | ribosomal protein L27(Rpl27)          |
| ENSMUSG00000046364 | ribosomal protein L27A(Rpl27a)        |
| ENSMUSG00000030432 | ribosomal protein L28(Rpl28)          |
| ENSMUSG00000048758 | ribosomal protein L29(Rpl29)          |
| ENSMUSG00000058600 | ribosomal protein L30(Rpl30)          |
| ENSMUSG00000073702 | ribosomal protein L31(Rpl31)          |
| ENSMUSG00000057841 | ribosomal protein L32(Rpl32)          |
| ENSMUSG00000062006 | ribosomal protein L34(Rpl34)          |
| ENSMUSG00000062997 | ribosomal protein L35(Rpl35)          |
| ENSMUSG00000060636 | ribosomal protein L35A(Rpl35a)        |
| ENSMUSG00000057863 | ribosomal protein L36(Rpl36)          |
| ENSMUSG00000079435 | ribosomal protein L36A(Rpl36a)        |
| ENSMUSG00000041841 | ribosomal protein L37(Rpl37)          |
| ENSMUSG00000046330 | ribosomal protein L37a(Rpl37a)        |
| ENSMUSG00000057322 | ribosomal protein L38(Rpl38)          |
| ENSMUSG00000079641 | ribosomal protein L39(Rpl39)          |
| ENSMUSG00000032399 | ribosomal protein L4(Rpl4)            |
| ENSMUSG00000093674 | ribosomal protein L41(Rpl41)          |
| ENSMUSG00000058558 | ribosomal protein L5(Rpl5)            |
| ENSMUSG00000029614 | ribosomal protein L6(Rpl6)            |
| ENSMUSG00000043716 | ribosomal protein L7(Rpl7)            |
| ENSMUSG00000062647 | ribosomal protein L7A(Rpl7a)          |
| ENSMUSG00000003970 | ribosomal protein L8(Rpl8)            |
| ENSMUSG00000047215 | ribosomal protein L9(Rpl9)            |
| ENSMUSG00000003429 | ribosomal protein S11(Rps11)          |
| ENSMUSG00000061983 | ribosomal protein S12(Rps12)          |
| ENSMUSG00000090862 | ribosomal protein S13(Rps13)          |
| ENSMUSG00000024608 | ribosomal protein S14(Rps14)          |
| ENSMUSG00000063457 | ribosomal protein S15(Rps15)          |
| ENSMUSG00000008683 | ribosomal protein S15A(Rps15a)        |
| ENSMUSG00000037563 | ribosomal protein S16(Rps16)          |



**Table S2A: List of genes expressed solely in the myofiber**

| Gene ID            | Gene Name                                                     |
|--------------------|---------------------------------------------------------------|
| ENSMUSG00000061787 | ribosomal protein S17(Rps17)                                  |
| ENSMUSG00000008668 | ribosomal protein S18(Rps18)                                  |
| ENSMUSG00000040952 | ribosomal protein S19(Rps19)                                  |
| ENSMUSG00000044533 | ribosomal protein S2(Rps2)                                    |
| ENSMUSG00000028234 | ribosomal protein S20(Rps20)                                  |
| ENSMUSG00000039001 | ribosomal protein S21(Rps21)                                  |
| ENSMUSG00000049517 | ribosomal protein S23(Rps23)                                  |
| ENSMUSG00000025290 | ribosomal protein S24(Rps24)                                  |
| ENSMUSG00000009927 | ribosomal protein S25(Rps25)                                  |
| ENSMUSG00000025362 | ribosomal protein S26(Rps26)                                  |
| ENSMUSG00000090733 | ribosomal protein S27(Rps27)                                  |
| ENSMUSG00000020460 | ribosomal protein S27A(Rps27a)                                |
| ENSMUSG00000067288 | ribosomal protein S28(Rps28)                                  |
| ENSMUSG00000034892 | ribosomal protein S29(Rps29)                                  |
| ENSMUSG00000028081 | ribosomal protein S3A1(Rps3a1)                                |
| ENSMUSG00000031320 | ribosomal protein S4, X-linked(Rps4x)                         |
| ENSMUSG00000012848 | ribosomal protein S5(Rps5)                                    |
| ENSMUSG00000089872 | ribosomal protein S6 kinase polypeptide 1(Rps6kc1)            |
| ENSMUSG00000031309 | ribosomal protein S6 kinase polypeptide 3(Rps6ka3)            |
| ENSMUSG00000047675 | ribosomal protein S8(Rps8)                                    |
| ENSMUSG00000006333 | ribosomal protein S9(Rps9)                                    |
| ENSMUSG00000032518 | ribosomal protein SA(Rpsa)                                    |
| ENSMUSG00000025508 | ribosomal protein, large P2(Rplp2)                            |
| ENSMUSG00000067274 | ribosomal protein, large, P0(Rplp0)                           |
| ENSMUSG00000007892 | ribosomal protein, large, P1(Rplp1)                           |
| ENSMUSG00000075376 | ring finger and CCCH-type zinc finger domains 2(Rc3h2)        |
| ENSMUSG00000040782 | ring finger and WD repeat domain 2(Rfwd2)                     |
| ENSMUSG00000063760 | ring finger protein 217(Rnf217)                               |
| ENSMUSG00000022952 | runt related transcription factor 1(Runx1)                    |
| ENSMUSG00000030592 | ryanodine receptor 1, skeletal muscle(Ryr1)                   |
| ENSMUSG00000001508 | sarcoglycan, alpha (dystrophin-associated glycoprotein)(Sgca) |
| ENSMUSG00000029189 | sel-1 suppressor of lin-12-like 3 (C. elegans)(Sel1l3)        |
| ENSMUSG00000042682 | selenoprotein K(Selk)                                         |
| ENSMUSG00000075700 | selenoprotein T(Selt)                                         |
| ENSMUSG00000058013 | septin 11(Sept11)                                             |
| ENSMUSG00000062604 | serine/arginine-rich protein specific kinase 2(Srpk2)         |
| ENSMUSG00000036371 | serpine1 mRNA binding protein 1(Serbp1)                       |
| ENSMUSG00000068739 | seryl-aminoacyl-tRNA synthetase(Sars)                         |

**Table S2A: List of genes expressed solely in the myofiber**

| Gene ID             | Gene Name                                                                          |
|---------------------|------------------------------------------------------------------------------------|
| ENSMUSG00000036432  | seven in absentia 2(Siah2)                                                         |
| ENSMUSG00000004040  | signal transducer and activator of transcription 3(Stat3)                          |
| ENSMUSG000000031609 | sin3 associated polypeptide(Sap30)                                                 |
| ENSMUSG000000022452 | single-pass membrane protein with aspartate rich tail 1(Smdt1)                     |
| ENSMUSG000000020063 | sirtuin 1(Sirt1)                                                                   |
| ENSMUSG000000040824 | small nuclear ribonucleoprotein D2(Snrpd2)                                         |
| ENSMUSG000000006587 | snail family zinc finger 3(Snai3)                                                  |
| ENSMUSG000000028645 | solute carrier family 2 (facilitated glucose transporter), member 1(Slc2a1)        |
| ENSMUSG000000027397 | solute carrier family 20, member 1(Slc20a1)                                        |
| ENSMUSG000000020334 | solute carrier family 22 (organic cation transporter), member 4(Slc22a4)           |
| ENSMUSG000000022462 | solute carrier family 38, member 2(Slc38a2)                                        |
| ENSMUSG000000052310 | solute carrier family 39 (zinc transporter), member 1(Slc39a1)                     |
| ENSMUSG000000019558 | solute carrier family 6 (neurotransmitter transporter, creatine), member 8(Slc6a8) |
| ENSMUSG000000034801 | son of sevenless homolog 2 (Drosophila)(Sos2)                                      |
| ENSMUSG000000071669 | sorting nexin 29(Snx29)                                                            |
| ENSMUSG000000023927 | special AT-rich sequence binding protein 1(Satb1)                                  |
| ENSMUSG000000096054 | spectrin repeat containing, nuclear envelope 1(Syne1)                              |
| ENSMUSG000000025283 | spermidine/spermine N1-acetyl transferase 1(Sat1)                                  |
| ENSMUSG000000050931 | sphingomyelin synthase 2(Sgms2)                                                    |
| ENSMUSG000000022114 | sprouty homolog 2 (Drosophila)(Spry2)                                              |
| ENSMUSG000000004085 | sterile alpha motif and leucine zipper containing kinase AZK(Zak)                  |
| ENSMUSG000000021838 | sterile alpha motif domain containing 4(Samd4)                                     |
| ENSMUSG000000021770 | sterile alpha motif domain containing 8(Samd8)                                     |
| ENSMUSG000000020961 | stonin 2(Ston2)                                                                    |
| ENSMUSG000000035673 | strawberry notch homolog 2 (Drosophila)(Sbno2)                                     |
| ENSMUSG000000032802 | sulfiredoxin 1 homolog (S. cerevisiae)(Srxn1)                                      |
| ENSMUSG000000022982 | superoxide dismutase 1, soluble(Sod1)                                              |
| ENSMUSG000000020027 | suppressor of cytokine signaling 2(Socs2)                                          |
| ENSMUSG000000014873 | surfeit gene 2(Surf2)                                                              |
| ENSMUSG000000023805 | synaptojanin 2(Synj2)                                                              |
| ENSMUSG000000050315 | synaptopodin 2(Synpo2)                                                             |
| ENSMUSG000000017009 | syndecan 4(Sdc4)                                                                   |
| ENSMUSG000000020903 | syntaxin 8(Stx8)                                                                   |
| ENSMUSG000000052698 | talin 2(Tln2)                                                                      |
| ENSMUSG000000074743 | thrombomodulin(Thbd)                                                               |
| ENSMUSG000000051747 | titin(Ttn)                                                                         |
| ENSMUSG000000070544 | topoisomerase (DNA) I(Top1)                                                        |
| ENSMUSG000000001604 | transcription elongation factor A (SII), 3(Tcea3)                                  |

**Table S2A: List of genes expressed solely in the myofiber**

| Gene ID             | Gene Name                                                                      |
|---------------------|--------------------------------------------------------------------------------|
| ENSMUSG00000055839  | transcription elongation factor B (SIII), polypeptide 2(Tceb2)                 |
| ENSMUSG00000024498  | transcription elongation regulator 1 (CA150)(Tcerg1)                           |
| ENSMUSG00000022858  | transformer 2 beta homolog (Drosophila)(Tra2b)                                 |
| ENSMUSG00000039239  | transforming growth factor, beta 2(Tgfb2)                                      |
| ENSMUSG00000030852  | transforming, acidic coiled-coil containing protein 2(Tacc2)                   |
| ENSMUSG000000091537 | translational machinery associated 7(Tma7)                                     |
| ENSMUSG00000027076  | translocase of inner mitochondrial membrane 10(Timm10)                         |
| ENSMUSG00000039016  | translocase of inner mitochondrial membrane 8B(Timm8b)                         |
| ENSMUSG00000057137  | transmembrane protein 140(Tmem140)                                             |
| ENSMUSG00000046675  | transmembrane protein 251(Tmem251)                                             |
| ENSMUSG00000036372  | transmembrane protein 258(Tmem258)                                             |
| ENSMUSG00000074634  | transmembrane protein 267(Tmem267)                                             |
| ENSMUSG00000047554  | transmembrane protein 41B(Tmem41b)                                             |
| ENSMUSG00000023153  | transmembrane protein 52(Tmem52)                                               |
| ENSMUSG00000032501  | tribbles pseudokinase 1(Trib1)                                                 |
| ENSMUSG00000028834  | tripartite motif-containing 63(Trim63)                                         |
| ENSMUSG00000022263  | triple functional domain (PTPRF interacting)(Trio)                             |
| ENSMUSG00000061723  | troponin T3, skeletal, fast(Tnnt3)                                             |
| ENSMUSG00000043091  | tubulin, alpha 1C(Tuba1c)                                                      |
| ENSMUSG00000023905  | tumor necrosis factor receptor superfamily, member 12a(Tnfrsf12a)              |
| ENSMUSG00000000296  | tumor protein D52-like 1(Tpd52l1)                                              |
| ENSMUSG00000060126  | tumor protein, translationally-controlled 1(Tpt1)                              |
| ENSMUSG00000038538  | ubiquitin 2(Ubn2)                                                              |
| ENSMUSG00000024208  | ubiquinol-cytochrome c reductase complex assembly factor 2(Uqcc2)              |
| ENSMUSG00000066036  | ubiquitin protein ligase E3 component n-recognin 4(Ubr4)                       |
| ENSMUSG00000037487  | ubiquitin protein ligase E3 component n-recognin 5(Ubr5)                       |
| ENSMUSG00000025616  | ubiquitin specific peptidase 16(Usp16)                                         |
| ENSMUSG00000032267  | ubiquitin specific peptidase 28(Usp28)                                         |
| ENSMUSG00000056342  | ubiquitin specific peptidase 34(Usp34)                                         |
| ENSMUSG00000022710  | ubiquitin specific peptidase 7(Usp7)                                           |
| ENSMUSG00000038965  | ubiquitin-conjugating enzyme E2L 3(Ube2l3)                                     |
| ENSMUSG00000026558  | uridine-cytidine kinase 2(Uck2)                                                |
| ENSMUSG00000042622  | v-maf musculoaponeurotic fibrosarcoma oncogene family, protein F (avian)(Maff) |
| ENSMUSG00000018143  | v-maf musculoaponeurotic fibrosarcoma oncogene family, protein K (avian)(Mafk) |
| ENSMUSG00000046230  | vacuolar protein sorting 13A(Vps13a)                                           |
| ENSMUSG00000023951  | vascular endothelial growth factor A(Vegfa)                                    |
| ENSMUSG00000024924  | very low density lipoprotein receptor(Vldlr)                                   |
| ENSMUSG00000049641  | vestigial like family member 2(Vgll2)                                          |

**Table S2A: List of genes expressed solely in the myofiber**

| Gene ID            | Gene Name                                                                    |
|--------------------|------------------------------------------------------------------------------|
| ENSMUSG00000026469 | xenotropic and polytropic retrovirus receptor 1(Xpr1)                        |
| ENSMUSG00000079243 | xin actin-binding repeat containing 1(Xirp1)                                 |
| ENSMUSG00000027022 | xin actin-binding repeat containing 2(Xirp2)                                 |
| ENSMUSG00000044068 | zinc finger (CCCH type), RNA binding motif and serine/arginine rich 1(Zrsr1) |
| ENSMUSG00000031370 | zinc finger (CCCH type), RNA binding motif and serine/arginine rich 2(Zrsr2) |
| ENSMUSG00000027091 | zinc finger CCCH-type containing 15(Zc3h15)                                  |
| ENSMUSG00000022635 | zinc finger CCHC-type and RNA binding motif 1(Zcrb1)                         |
| ENSMUSG00000069114 | zinc finger and BTB domain containing 10(Zbtb10)                             |
| ENSMUSG00000022708 | zinc finger and BTB domain containing 20(Zbtb20)                             |
| ENSMUSG00000027288 | zinc finger protein 106(Zfp106)                                              |
| ENSMUSG00000094870 | zinc finger protein 131(Zfp131)                                              |
| ENSMUSG00000060206 | zinc finger protein 462(Zfp462)                                              |
| ENSMUSG00000007812 | zinc finger protein 655(Zfp655)                                              |
| ENSMUSG00000085795 | zinc finger protein 703(Zfp703)                                              |
| ENSMUSG00000027520 | zinc finger, DBF-type containing 2(Zdbf2)                                    |
| ENSMUSG00000037553 | zinc finger, DHHC domain containing 18(Zdhhc18)                              |
| ENSMUSG00000074578 | zinc finger, NFX1-type containing 1, antisense RNA 1(Zfas1)                  |
| ENSMUSG00000030967 | zinc finger, RAN-binding domain containing 1(Zranb1)                         |

\* List of genes exclusively expressed in the single myofiber, defined as genes with a q value lower than 0.01 between single fiber and whole muscle, that are more highly expressed in the single fiber with a Log<sub>2</sub> fold change of less than -1, more highly expressed than 10 RPM and with a difference in expression between single fiber and whole muscle of at least 10 RPM

**Table S2B: GO term analysis of genes expressed solely in myofibers**

| Annotation Cluster 1 |                                                    | Enrichment Score: 41.59143623593712  |             |          |            |          |           |                 |            |           |          |
|----------------------|----------------------------------------------------|--------------------------------------|-------------|----------|------------|----------|-----------|-----------------|------------|-----------|----------|
| Category             | Term                                               | Count                                | %           | PValue   | List Total | Pop Hits | Pop Total | Fold Enrichment | Bonferroni | Benjamini | FDR      |
| UP_KEYWORDS          | Ribosomal protein                                  | 61                                   | 17.13483146 | 2.25E-60 | 349        | 203      | 22680     | 19.52771465     | 5.33E-58   | 5.33E-58  | 2.90E-57 |
| KEGG_PATHWAY         | mmu03010:Ribosome                                  | 61                                   | 17.13483146 | 2.67E-57 | 214        | 145      | 7691      | 15.11927167     | 4.80E-55   | 4.80E-55  | 3.29E-54 |
| GOTERM_CC_DIRECT     | GO:0005840~ribosome                                | 58                                   | 16.29213483 | 2.20E-55 | 339        | 188      | 19662     | 17.89361702     | 7.43E-53   | 7.43E-53  | 2.99E-52 |
| GOTERM_MF_DIRECT     | GO:0003735~structural constituent of ribosome      | 61                                   | 17.13483146 | 9.74E-49 | 319        | 264      | 17446     | 12.63662487     | 4.74E-46   | 4.74E-46  | 1.40E-45 |
| UP_KEYWORDS          | Ribonucleoprotein                                  | 61                                   | 17.13483146 | 1.49E-48 | 349        | 308      | 22680     | 12.8705392      | 3.54E-46   | 1.77E-46  | 1.92E-45 |
| GOTERM_BP_DIRECT     | GO:0006412~translation                             | 64                                   | 17.97752809 | 1.24E-40 | 332        | 401      | 18082     | 8.692485653     | 2.20E-37   | 2.20E-37  | 2.11E-37 |
| GOTERM_CC_DIRECT     | GO:0030529~intracellular ribonucleoprotein complex | 57                                   | 16.01123596 | 4.52E-40 | 339        | 320      | 19662     | 10.33125        | 1.53E-37   | 7.63E-38  | 6.15E-37 |
| GOTERM_CC_DIRECT     | GO:0022627~cytosolic small ribosomal subunit       | 28                                   | 7.865168539 | 5.07E-34 | 339        | 53       | 19662     | 30.64150943     | 1.71E-31   | 5.71E-32  | 6.90E-31 |
| GOTERM_CC_DIRECT     | GO:0022625~cytosolic large ribosomal subunit       | 31                                   | 8.707865169 | 1.19E-30 | 339        | 91       | 19662     | 19.75824176     | 4.01E-28   | 1.00E-28  | 1.62E-27 |
| GOTERM_MF_DIRECT     | GO:0044822~poly(A) RNA binding                     | 81                                   | 22.75280899 | 2.67E-27 | 319        | 1113     | 17446     | 3.980109676     | 1.30E-24   | 6.50E-25  | 3.83E-24 |
| GOTERM_CC_DIRECT     | GO:0005925~focal adhesion                          | 44                                   | 12.35955056 | 1.80E-22 | 339        | 391      | 19662     | 6.52685422      | 6.09E-20   | 8.70E-21  | 2.45E-19 |
| Annotation Cluster 2 |                                                    | Enrichment Score: 12.979686554524369 |             |          |            |          |           |                 |            |           |          |
| Category             | Term                                               | Count                                | %           | PValue   | List Total | Pop Hits | Pop Total | Fold Enrichment | Bonferroni | Benjamini | FDR      |
| UP_KEYWORDS          | Respiratory chain                                  | 23                                   | 6.460674157 | 1.21E-24 | 349        | 62       | 22680     | 24.1075885      | 2.88E-22   | 5.75E-23  | 1.56E-21 |
| KEGG_PATHWAY         | mmu00190:Oxidative phosphorylation                 | 35                                   | 9.831460674 | 1.81E-23 | 214        | 139      | 7691      | 9.049452027     | 3.25E-21   | 1.63E-21  | 2.23E-20 |
| UP_KEYWORDS          | Mitochondrion inner membrane                       | 36                                   | 10.11235955 | 3.23E-23 | 349        | 254      | 22680     | 9.210567877     | 7.65E-21   | 1.27E-21  | 4.16E-20 |
| GOTERM_CC_DIRECT     | GO:0070469~respiratory chain                       | 22                                   | 6.179775281 | 8.56E-23 | 339        | 58       | 19662     | 22              | 2.89E-20   | 4.82E-21  | 1.17E-19 |

**Table S2B: GO term analysis of genes expressed solely in myofibers**

|                  |                                                      |    |             |             |     |      |       |             |           |           |          |
|------------------|------------------------------------------------------|----|-------------|-------------|-----|------|-------|-------------|-----------|-----------|----------|
| KEGG_PATHWAY     | mmu05012:Parkinson's disease                         | 35 | 9.831460674 | 2.08E-22    | 214 | 149  | 7691  | 8.442106254 | 3.75E-20  | 1.25E-20  | 2.56E-19 |
| UP_KEYWORDS      | Electron transport                                   | 23 | 6.460674157 | 7.12E-19    | 349 | 107  | 22680 | 13.96888306 | 1.69E-16  | 2.41E-17  | 9.18E-16 |
| GOTERM_CC_DIRECT | GO:0005743~mitochondrial inner membrane              | 39 | 10.95505618 | 2.89E-18    | 339 | 387  | 19662 | 5.84496124  | 9.76E-16  | 1.22E-16  | 3.93E-15 |
| GOTERM_CC_DIRECT | GO:0005747~mitochondrial respiratory chain complex I | 17 | 4.775280899 | 3.67E-17    | 339 | 47   | 19662 | 20.9787234  | 1.24E-14  | 1.24E-15  | 5.00E-14 |
| KEGG_PATHWAY     | mmu05010:Alzheimer's disease                         | 32 | 8.988764045 | 5.80E-17    | 214 | 177  | 7691  | 6.497491948 | 2.00E-14  | 5.00E-15  | 1.33E-13 |
| KEGG_PATHWAY     | mmu05016:Huntington's disease                        | 32 | 8.988764045 | 1.75E-15    | 214 | 198  | 7691  | 5.808364014 | 3.20E-13  | 6.39E-14  | 2.19E-12 |
| KEGG_PATHWAY     | mmu04932:Non-alcoholic fatty liver disease (NAFLD)   | 28 | 7.865168539 | 1.24E-14    | 214 | 157  | 7691  | 6.409548187 | 2.24E-12  | 3.73E-13  | 1.53E-11 |
| GOTERM_CC_DIRECT | GO:0005739~mitochondrion                             | 70 | 19.66292135 | 2.00E-11    | 339 | 1721 | 19662 | 2.35909355  | 6.77E-09  | 4.51E-10  | 2.73E-08 |
| UP_KEYWORDS      | Mitochondrion                                        | 48 | 13.48314607 | 5.88E-11    | 349 | 1058 | 22680 | 2.948310322 | 1.39E-08  | 1.39E-09  | 7.58E-08 |
| UP_KEYWORDS      | Ubiquinone                                           | 9  | 2.528089888 | 2.44E-09    | 349 | 25   | 22680 | 23.39484241 | 5.79E-07  | 5.26E-08  | 3.15E-06 |
| GOTERM_MF_DIRECT | GO:0008137~NADH dehydrogenase (ubiquinone) activity  | 10 | 2.808988764 | 9.24E-09    | 319 | 35   | 17446 | 15.62561576 | 4.50E-06  | 1.50E-06  | 1.32E-05 |
| GOTERM_BP_DIRECT | GO:0055114~oxidation-reduction process               | 31 | 8.707865169 | 7.59E-06    | 332 | 676  | 18082 | 2.497602837 | 0.0133630 | 0.0019200 | 0.01286  |
| UP_KEYWORDS      | Transport                                            | 46 | 12.92134831 | 0.002449138 | 349 | 1901 | 22680 | 1.572509718 | 0.4407494 | 0.0212943 | 3.10942  |
| KEGG_PATHWAY     | mmu01100:Metabolic pathways                          | 48 | 13.48314607 | 0.019405427 | 214 | 1269 | 7691  | 1.359404344 | 0.9706162 | 0.2546808 | 21.4453  |
| GOTERM_BP_DIRECT | GO:0006810~transport                                 | 45 | 12.64044944 | 0.034846545 | 332 | 1822 | 18082 | 1.345155595 | 0.5534566 | 45.1863   |          |
| UP_KEYWORDS      | NAD                                                  | 7  | 1.966292135 | 0.063495213 | 349 | 183  | 22680 | 2.485790784 | 0.9999998 | 0.3155938 | 57.0465  |

**Table S2B: GO term analysis of genes expressed solely in myofibers**

| Category    | Term                                          | Count | %           | PValue      | List Total | Pop Hits | Pop Total | Fold Enrichment | Bonferroni      | Benjamini       | FDR             |
|-------------|-----------------------------------------------|-------|-------------|-------------|------------|----------|-----------|-----------------|-----------------|-----------------|-----------------|
| INTERPRO    | IPR002068:Alpha crystallin/Hsp20 domain       | 5     | 1.404494382 | 2.10E-05    | 337        | 11       | 20594     | 27.77717831     | 0.0160056<br>92 | 0.0053639<br>51 | 0.03203<br>5079 |
| INTERPRO    | IPR001436:Alpha crystallin/Heat shock protein | 4     | 1.123595506 | 2.27E-04    | 337        | 8        | 20594     | 30.55489614     | 0.1600835<br>3  | 0.0286568<br>48 | 0.34581<br>8269 |
| UP_KEYWORDS | Stress response                               | 7     | 1.966292135 | 0.001033852 | 349        | 75       | 22680     | 6.065329513     | 0.2174125<br>09 | 0.0093845<br>17 | 1.32363<br>4198 |
| INTERPRO    | IPR008978:HSP20-like chaperone                | 4     | 1.123595506 | 0.008474695 | 337        | 26       | 20594     | 9.401506505     | 0.9985624<br>46 | 0.4203906<br>9  | 12.1871<br>9162 |

**Annotation Cluster 4**

**Enrichment Score: 3.087280652744633**

| Category         | Term                                          | Co nt | %           | PValue      | List Total | Pop Hits | Pop Total | Fold Enrichment | Bonferroni      | Benjamini       | FDR             |
|------------------|-----------------------------------------------|-------|-------------|-------------|------------|----------|-----------|-----------------|-----------------|-----------------|-----------------|
| UP_KEYWORDS      | Translation regulation                        | 9     | 2.528089888 | 1.66E-04    | 349        | 101      | 22680     | 5.790802576     | 0.0385657<br>66 | 0.0020678<br>13 | 0.21353<br>8978 |
| GOTERM_BP_DIRECT | GO:0006417~regulation of translation          | 9     | 2.528089888 | 0.001739215 | 332        | 121      | 18082     | 4.051030569     | 0.9543299<br>95 | 0.1009571<br>71 | 2.90765<br>2286 |
| GOTERM_BP_DIRECT | GO:0017148~negative regulation of translation | 7     | 1.966292135 | 0.00189616  | 332        | 71       | 18082     | 5.369675887     | 0.9654408<br>25 | 0.1028668<br>95 | 3.16608<br>3221 |

**Annotation Cluster 5**

**Enrichment Score: 2.863609521148051**

| Category         | Term                                                              | Co nt | %           | PValue   | List Total | Pop Hits | Pop Total | Fold Enrichment | Bonferroni      | Benjamini       | FDR             |
|------------------|-------------------------------------------------------------------|-------|-------------|----------|------------|----------|-----------|-----------------|-----------------|-----------------|-----------------|
| GOTERM_CC_DIRECT | GO:0005753~mitochondrial proton-transporting ATP synthase complex | 7     | 1.966292135 | 3.85E-07 | 339        | 18       | 19662     | 22.55555556     | 1.30E-04        | 6.20E-06        | 5.24E-04        |
| GOTERM_BP_DIRECT | GO:0006754~ATP biosynthetic process                               | 6     | 1.685393258 | 5.12E-05 | 332        | 23       | 18082     | 14.20796228     | 0.0867238<br>62 | 0.0082130<br>86 | 0.08669<br>5087 |
| GOTERM_BP_DIRECT | GO:0015986~ATP synthesis coupled proton transport                 | 6     | 1.685393258 | 5.12E-05 | 332        | 23       | 18082     | 14.20796228     | 0.0867238<br>62 | 0.0082130<br>86 | 0.08669<br>5087 |
| UP_KEYWORDS      | Hydrogen ion transport                                            | 6     | 1.685393258 | 6.10E-04 | 349        | 45       | 22680     | 8.664756447     | 0.1346697<br>31 | 0.0065531<br>62 | 0.78310<br>7771 |

**Table S2B: GO term analysis of genes expressed solely in myofibers**

|                  |                                                                                         |    |             |             |     |     |       |             |                 |                 |                 |
|------------------|-----------------------------------------------------------------------------------------|----|-------------|-------------|-----|-----|-------|-------------|-----------------|-----------------|-----------------|
| GOTERM_BP_DIRECT | GO:0015992~proton transport                                                             | 7  | 1.966292135 | 6.53E-04    | 332 | 58  | 18082 | 6.57322393  | 0.6861464<br>26 | 0.0471373<br>7  | 1.10181<br>7829 |
| UP_KEYWORDS      | CF(0)                                                                                   | 4  | 1.123595506 | 7.11E-04    | 349 | 12  | 22680 | 21.66189112 | 0.1551071<br>01 | 0.0073012<br>76 | 0.91191<br>894  |
| GOTERM_BP_DIRECT | GO:0046034~ATP metabolic process                                                        | 6  | 1.685393258 | 7.76E-04    | 332 | 40  | 18082 | 8.169578313 | 0.7473203<br>64 | 0.0535388<br>11 | 1.30660<br>37   |
| UP_KEYWORDS      | ATP synthesis                                                                           | 4  | 1.123595506 | 9.14E-04    | 349 | 13  | 22680 | 19.9955918  | 0.1947863<br>51 | 0.0086284<br>65 | 1.17064<br>8524 |
| GOTERM_CC_DIRECT | GO:0045263~proton-transporting ATP synthase complex, coupling factor F(o)               | 4  | 1.123595506 | 9.87E-04    | 339 | 12  | 19662 | 19.33333333 | 0.2838185<br>1  | 0.0097702<br>42 | 1.33477<br>6129 |
| GOTERM_CC_DIRECT | GO:0000276~mitochondrial proton-transporting ATP synthase complex, coupling factor F(o) | 4  | 1.123595506 | 9.87E-04    | 339 | 12  | 19662 | 19.33333333 | 0.2838185<br>1  | 0.0097702<br>42 | 1.33477<br>6129 |
| GOTERM_MF_DIRECT | GO:0046933~proton-transporting ATP synthase activity, rotational mechanism              | 4  | 1.123595506 | 0.001881068 | 319 | 14  | 17446 | 15.62561576 | 0.6002606<br>77 | 0.0633971<br>16 | 2.66516<br>2693 |
| GOTERM_MF_DIRECT | GO:0015078~hydrogen ion transmembrane transporter activity                              | 4  | 1.123595506 | 0.020140248 | 319 | 32  | 17446 | 6.836206897 | 0.9999502<br>46 | 0.2812779<br>74 | 25.3159<br>0099 |
| GOTERM_MF_DIRECT | GO:0016887~ATPase activity                                                              | 7  | 1.966292135 | 0.158742929 | 319 | 200 | 17446 | 1.914137931 | 1               | 0.7657604<br>75 | 91.6257<br>2264 |
| UP_KEYWORDS      | Ion transport                                                                           | 13 | 3.651685393 | 0.243139277 | 349 | 619 | 22680 | 1.364804125 | 1               | 0.6734021<br>68 | 97.2361<br>6625 |
| GOTERM_BP_DIRECT | GO:0006811~ion transport                                                                | 13 | 3.651685393 | 0.38532889  | 332 | 584 | 18082 | 1.212380343 | 1               | 0.9942974<br>38 | 99.9738<br>6505 |

| Annotation Cluster 6 |                                           | Enrichment Score: 2.7891107355696447 |             |          |            |          |           |                 |                 |           |                 |
|----------------------|-------------------------------------------|--------------------------------------|-------------|----------|------------|----------|-----------|-----------------|-----------------|-----------|-----------------|
| Category             | Term                                      | Count                                | %           | PValue   | List Total | Pop Hits | Pop Total | Fold Enrichment | Bonferroni      | Benjamini | FDR             |
| GOTERM_MF_DIRECT     | GO:0004129~cytochrome -c oxidase activity | 7                                    | 1.966292135 | 9.40E-06 | 319        | 28       | 17446     | 13.67241379     | 0.0045659<br>35 | 6.54E-04  | 0.01348<br>1183 |



**Table S2B: GO term analysis of genes expressed solely in myofibers**

|                  |                                                                     |    |             |             |     |    |       |             |                 |                 |                 |
|------------------|---------------------------------------------------------------------|----|-------------|-------------|-----|----|-------|-------------|-----------------|-----------------|-----------------|
| KEGG_PATHWAY     | mmu04260:Cardiac muscle contraction                                 | 11 | 3.08988764  | 4.66E-05    | 214 | 77 | 7691  | 5.134178905 | 0.0083534<br>38 | 0.0011976<br>43 | 0.05738<br>6581 |
| GOTERM_CC_DIRECT | GO:0005751~mitochondrial respiratory chain complex IV               | 4  | 1.123595506 | 0.001964962 | 339 | 15 | 19662 | 15.46666667 | 0.4856290<br>12 | 0.0178073<br>92 | 2.64063<br>4492 |
| UP_SEQ_FEATURE   | topological domain:Mitochondrial matrix                             | 4  | 1.123595506 | 0.013656687 | 326 | 28 | 18012 | 7.893076249 | 0.9999999<br>98 | 0.9814582<br>65 | 20.3507<br>4823 |
| GOTERM_BP_DIRECT | GO:0006123~mitochondrial electron transport, cytochrome c to oxygen | 3  | 0.842696629 | 0.019533065 | 332 | 12 | 18082 | 13.61596386 | 1               | 0.4311338<br>72 | 28.4223<br>4892 |
| UP_SEQ_FEATURE   | topological domain:Mitochondrial intermembrane                      | 4  | 1.123595506 | 0.080254748 | 326 | 56 | 18012 | 3.946538124 | 1               | 0.9983124<br>34 | 74.9505<br>1382 |

| Annotation Cluster 7 |                                                                                                | Enrichment Score: 2.7596899671556194 |             |             |            |          |           |                 |                 |                 |                 |
|----------------------|------------------------------------------------------------------------------------------------|--------------------------------------|-------------|-------------|------------|----------|-----------|-----------------|-----------------|-----------------|-----------------|
| Category             | Term                                                                                           | Count                                | %           | PValue      | List Total | Pop Hits | Pop Total | Fold Enrichment | Bonferroni      | Benjamini       | FDR             |
| SMART                | SM00338:BRLZ                                                                                   | 8                                    | 2.247191011 | 1.02E-05    | 158        | 51       | 10425     | 10.34996277     | 0.0015089<br>18 | 0.0015089<br>18 | 0.01215<br>5145 |
| INTERPRO             | IPR004827:Basic-leucine zipper domain                                                          | 8                                    | 2.247191011 | 2.65E-05    | 337        | 54       | 20594     | 9.053302561     | 0.0201780<br>33 | 0.0050831<br>34 | 0.04046<br>9865 |
| UP_SEQ_FEATURE       | domain:Leucine-zipper                                                                          | 9                                    | 2.528089888 | 7.60E-04    | 326        | 108      | 18012     | 4.604294479     | 0.6679060<br>44 | 0.6679060<br>44 | 1.25009<br>4721 |
| INTERPRO             | IPR008917:Eukaryotic transcription factor, Skn-1-like, DNA-binding                             | 4                                    | 1.123595506 | 0.002469826 | 337        | 17       | 20594     | 14.37877466     | 0.8506773<br>21 | 0.1731769<br>46 | 3.70576<br>1661 |
| UP_SEQ_FEATURE       | DNA-binding region:Basic motif                                                                 | 9                                    | 2.528089888 | 0.007469565 | 326        | 156      | 18012     | 3.187588485     | 0.9999810<br>09 | 0.9339854<br>92 | 11.6677<br>1477 |
| GOTERM_BP_DIRECT     | GO:1990440~positive regulation of transcription from RNA polymerase II promoter in response to | 3                                    | 0.842696629 | 0.016474697 | 332        | 11       | 18082     | 14.85377875     | 1               | 0.3879137<br>44 | 24.5419<br>6195 |

**Table S2B: GO term analysis of genes expressed solely in myofibers**

|                  |                                                 |    |             |             |     |     |       |             |  |           |           |         |
|------------------|-------------------------------------------------|----|-------------|-------------|-----|-----|-------|-------------|--|-----------|-----------|---------|
|                  | endoplasmic reticulum stress                    |    |             |             |     |     |       |             |  | 0.9999993 | 0.6137358 | 24.6732 |
| INTERPRO         | IPR004826:Basic leucine zipper domain, Maf-type | 3  | 0.842696629 | 0.018383546 | 337 | 13  | 20594 | 14.10225976 |  | 64        | 04        | 6914    |
| GOTERM_MF_DIRECT | GO:0043565~sequence-specific DNA binding        | 18 | 5.056179775 | 0.072844249 | 319 | 633 | 17446 | 1.555156071 |  | 1         | 8         | 4373    |

| Annotation Cluster 8 |                                                            | Enrichment Score: 2.5829907559851213 |             |             |            |          |           |                 |            |           |         |  |
|----------------------|------------------------------------------------------------|--------------------------------------|-------------|-------------|------------|----------|-----------|-----------------|------------|-----------|---------|--|
| Category             | Term                                                       | Count                                | %           | PValue      | List Total | Pop Hits | Pop Total | Fold Enrichment | Bonferroni | Benjamini | FDR     |  |
| GOTERM_CC_DIRECT     | GO:0005913~cell-cell adherens junction                     | 16                                   | 4.494382022 | 4.02E-04    | 339        | 316      | 19662     | 2.936708861     | 0.1271345  | 0.0045222 | 0.54585 |  |
| GOTERM_MF_DIRECT     | GO:0098641~cadherin binding involved in cell-cell adhesion | 14                                   | 3.93258427  | 0.001897561 | 319        | 279      | 17446     | 2.744283772     | 0.6034646  | 0.0598031 | 2.68823 |  |
| GOTERM_BP_DIRECT     | GO:0098609~cell-cell adhesion                              | 9                                    | 2.528089888 | 0.023355034 | 332        | 189      | 18082     | 2.593516925     | 1          | 0.4649357 | 33.0078 |  |
|                      |                                                            |                                      |             |             |            |          |           |                 |            | 58        | 3177    |  |

| Annotation Cluster 9 |                                        | Enrichment Score: 2.5296778101308597 |             |             |            |          |           |                 |            |           |         |  |
|----------------------|----------------------------------------|--------------------------------------|-------------|-------------|------------|----------|-----------|-----------------|------------|-----------|---------|--|
| Category             | Term                                   | Count                                | %           | PValue      | List Total | Pop Hits | Pop Total | Fold Enrichment | Bonferroni | Benjamini | FDR     |  |
| GOTERM_BP_DIRECT     | GO:0055114~oxidation-reduction process | 31                                   | 8.707865169 | 7.59E-06    | 332        | 676      | 18082     | 2.497602837     | 0.0133630  | 0.0019200 | 0.01286 |  |
| UP_KEYWORDS          | Oxidoreductase                         | 17                                   | 4.775280899 | 0.038826877 | 349        | 639      | 22680     | 1.728883329     | 31         | 29        | 143     |  |
| GOTERM_MF_DIRECT     | GO:0016491~oxidoreductase activity     | 17                                   | 4.775280899 | 0.08744228  | 319        | 604      | 17446     | 1.539278374     | 0.9999160  | 0.2188464 | 39.9580 |  |
|                      |                                        |                                      |             |             |            |          |           |                 | 57         | 52        | 9558    |  |
|                      |                                        |                                      |             |             |            |          |           |                 | 1          | 0.6204421 | 73.0937 |  |
|                      |                                        |                                      |             |             |            |          |           |                 |            | 46        | 9559    |  |

| Annotation Cluster 10 |                                   | Enrichment Score: 2.2944128109355715 |             |          |            |          |           |                 |            |           |         |  |
|-----------------------|-----------------------------------|--------------------------------------|-------------|----------|------------|----------|-----------|-----------------|------------|-----------|---------|--|
| Category              | Term                              | Count                                | %           | PValue   | List Total | Pop Hits | Pop Total | Fold Enrichment | Bonferroni | Benjamini | FDR     |  |
| GOTERM_BP_DIRECT      | GO:0000122~negative regulation of | 30                                   | 8.426966292 | 7.93E-05 | 332        | 729      | 18082     | 2.241310923     | 0.1311211  | 0.0107534 | 0.13428 |  |
|                       |                                   |                                      |             |          |            |          |           |                 | 12         | 21        | 8242    |  |

**Table S2B: GO term analysis of genes expressed solely in myofibers**

|                  |                                                                                 |     |             |             |     |      |       |             |           |           |         |
|------------------|---------------------------------------------------------------------------------|-----|-------------|-------------|-----|------|-------|-------------|-----------|-----------|---------|
|                  | transcription from RNA polymerase II promoter                                   |     |             |             |     |      |       |             | 0.0205434 | 0.0011525 | 0.11276 |
| UP_KEYWORDS      | Nucleus                                                                         | 100 | 28.08988764 | 8.76E-05    | 349 | 4534 | 22680 | 1.433296721 | 73        | 26        | 014     |
|                  | GO:0045944~positive regulation of transcription from RNA polymerase II promoter |     |             |             |     |      |       |             | 0.4661234 | 0.0342653 | 0.59823 |
| GOTERM_BP_DIRECT |                                                                                 | 35  | 9.831460674 | 3.54E-04    | 332 | 995  | 18082 | 1.91581401  | 16        | 23        | 0148    |
| UP_KEYWORDS      | Transcription regulation                                                        | 47  | 13.20224719 | 4.45E-04    | 349 | 1799 | 22680 | 1.697791355 | 39        | 53        | 8923    |
| UP_KEYWORDS      | Transcription                                                                   | 47  | 13.20224719 | 8.89E-04    | 349 | 1859 | 22680 | 1.642994431 | 0.1900639 | 0.0087448 | 1.13923 |
| UP_KEYWORDS      | Activator                                                                       | 19  | 5.337078652 | 0.008200109 | 349 | 624  | 22680 | 1.978730439 | 58        | 72        | 1673    |
|                  | GO:0006351~transcription, DNA-templated                                         |     |             |             |     |      |       |             | 0.8579303 | 0.0629774 | 10.0635 |
| GOTERM_BP_DIRECT |                                                                                 | 49  | 13.76404494 | 0.011600696 | 332 | 1885 | 18082 | 1.415771308 | 61        | 5         | 9504    |
|                  | GO:0045893~positive regulation of transcription, DNA-templated                  |     |             |             |     |      |       |             | 0.9999999 | 0.3282380 | 17.9463 |
| GOTERM_BP_DIRECT |                                                                                 | 19  | 5.337078652 | 0.019768799 | 332 | 576  | 18082 | 1.796550786 |           | 0.4298884 | 28.7135 |
| UP_KEYWORDS      | DNA-binding                                                                     | 35  | 9.831460674 | 0.035216739 | 349 | 1604 | 22680 | 1.418016563 | 1         | 53        | 1291    |
|                  | GO:0003700~transcription factor activity, sequence-specific DNA binding         |     |             |             |     |      |       |             | 0.9997958 | 0.2051845 | 36.9873 |
| GOTERM_MF_DIRECT |                                                                                 | 24  | 6.741573034 | 0.055027421 | 319 | 883  | 17446 | 1.486468544 | 95        | 49        | 4199    |
|                  | GO:0043565~sequence-specific DNA binding                                        |     |             |             |     |      |       |             |           | 0.5067634 | 55.6046 |
| GOTERM_MF_DIRECT |                                                                                 | 18  | 5.056179775 | 0.072844249 | 319 | 633  | 17446 | 1.555156071 | 1         | 87        | 2999    |
|                  | GO:0006355~regulation of transcription, DNA-templated                           |     |             |             |     |      |       |             |           | 0.5839670 | 66.2139 |
| GOTERM_BP_DIRECT |                                                                                 | 52  | 14.60674157 | 0.073886954 | 332 | 2279 | 18082 | 1.242703151 | 1         | 8         | 4373    |
|                  | GO:0003677~DNA binding                                                          |     |             |             |     |      |       |             |           | 0.7435794 | 72.7785 |
| GOTERM_MF_DIRECT |                                                                                 | 43  | 12.07865169 | 0.078076418 | 319 | 1847 | 17446 | 1.273229655 | 1         | 91        | 2594    |
|                  |                                                                                 |     |             |             |     |      |       |             |           | 0.5933348 | 68.8487 |

**Table S2B: GO term analysis of genes expressed solely in myofibers**

| Category                     | Term                                                      | Count | %           | PValue      | List Total                                 | Pop Hits | Pop Total | Fold Enrichment | Bonferroni | Benjamini | FDR     |
|------------------------------|-----------------------------------------------------------|-------|-------------|-------------|--------------------------------------------|----------|-----------|-----------------|------------|-----------|---------|
| UP_KEYWORDS                  | Biological rhythms                                        | 8     | 2.247191011 | 0.003352474 | 349                                        | 126      | 22680     | 4.126074499     | 0.5488119  | 0.0280238 | 4.23360 |
| GOTERM_BP_DIRECT             | GO:0007623~circadian rhythm                               | 8     | 2.247191011 | 0.003722216 | 332                                        | 108      | 18082     | 4.034359661     | 53         | 06        | 407     |
| GOTERM_BP_DIRECT             | GO:0048511~rhythmic process                               | 8     | 2.247191011 | 0.009279345 | 332                                        | 128      | 18082     | 3.403990964     | 0.9986555  | 0.1636410 | 6.12575 |
| GOTERM_BP_DIRECT             | GO:0032922~circadian regulation of gene expression        | 5     | 1.404494382 | 0.025435328 | 332                                        | 61       | 18082     | 4.464250444     | 93         | 19        | 4047    |
|                              |                                                           |       |             |             |                                            |          |           |                 | 0.9999999  | 0.2814943 | 14.6176 |
|                              |                                                           |       |             |             |                                            |          |           |                 | 34         | 74        | 9197    |
|                              |                                                           |       |             |             |                                            |          |           |                 | 1          | 22        | 553     |
|                              |                                                           |       |             |             |                                            |          |           |                 |            | 0.4744890 | 35.3860 |
|                              |                                                           |       |             |             |                                            |          |           |                 |            |           |         |
| <b>Annotation Cluster 12</b> |                                                           |       |             |             | <b>Enrichment Score: 1.941512977302931</b> |          |           |                 |            |           |         |
| Category                     | Term                                                      | Count | %           | PValue      | List Total                                 | Pop Hits | Pop Total | Fold Enrichment | Bonferroni | Benjamini | FDR     |
| INTERPRO                     | IPR004038:Ribosomal protein                               | 6     | 1.685393258 | 5.91E-06    | 337                                        | 17       | 20594     | 21.56816198     | 0.0045347  | 0.0045347 | 0.00902 |
| GOTERM_BP_DIRECT             | L7Ae/L30e/S12e/Gadd45                                     | 6     | 1.685393258 | 4.12E-04    | 332                                        | 35       | 18082     | 9.336660929     | 82         | 82        | 4961    |
|                              | GO:0006950~response to stress                             | 6     | 1.685393258 | 4.12E-04    | 332                                        | 35       | 18082     | 9.336660929     | 0.5186629  | 0.0377524 | 0.69663 |
| INTERPRO                     | IPR024824:Growth arrest and DNA damage-inducible protein  | 3     | 0.842696629 | 7.88E-04    | 337                                        | 3        | 20594     | 61.10979228     | 83         | 74        | 5893    |
| GOTERM_BP_DIRECT             | GADD45                                                    | 3     | 0.842696629 | 7.88E-04    | 337                                        | 3        | 20594     | 61.10979228     | 0.4544318  | 0.0829204 | 1.19600 |
| GOTERM_BP_DIRECT             | GO:0051726~regulation of cell cycle                       | 8     | 2.247191011 | 0.004547127 | 332                                        | 112      | 18082     | 3.890275387     | 69         | 72        | 3713    |
| GOTERM_BP_DIRECT             | GO:0000185~activation of MAPKKK activity                  | 3     | 0.842696629 | 0.008696538 | 332                                        | 8        | 18082     | 20.42394578     | 0.9996904  | 0.1829141 | 7.43466 |
| GOTERM_BP_DIRECT             | GO:1900745~positive regulation of p38MAPK cascade         | 3     | 0.842696629 | 0.03790937  | 332                                        | 17       | 18082     | 9.611268604     | 0.9999998  | 0.2757606 | 13.7622 |
| GOTERM_BP_DIRECT             | GO:0006469~negative regulation of protein kinase activity | 5     | 1.404494382 | 0.096792556 | 332                                        | 95       | 18082     | 2.866518706     | 12         | 32        | 652     |
|                              |                                                           |       |             |             |                                            |          |           |                 |            | 0.5663924 | 48.0615 |
|                              |                                                           |       |             |             |                                            |          |           |                 | 1          | 43        | 2502    |
|                              |                                                           |       |             |             |                                            |          |           |                 | 1          | 52        | 4122    |

**Table S2B: GO term analysis of genes expressed solely in myofibers**

|                  |                                               |   |             |             |     |     |       |             |   |           |    |         |
|------------------|-----------------------------------------------|---|-------------|-------------|-----|-----|-------|-------------|---|-----------|----|---------|
| GOTERM_BP_DIRECT | GO:0046330~positive regulation of JNK cascade | 3 | 0.842696629 | 0.367671606 | 332 | 70  | 18082 | 2.334165232 | 1 | 0.9929531 | 31 | 99.9577 |
| KEGG_PATHWAY     | mmu04115:p53 signaling pathway                | 3 | 0.842696629 | 0.558038581 | 214 | 67  | 7691  | 1.609220254 | 1 | 0.9790954 | 08 | 99.9957 |
| KEGG_PATHWAY     | mmu04110:Cell cycle                           | 4 | 1.123595506 | 0.672828883 | 214 | 124 | 7691  | 1.159330721 | 1 | 0.9861422 | 95 | 99.9998 |

**Annotation Cluster 13**

**Enrichment Score: 1.5614457063684288**

| Category       | Term       | Count | %           | PValue      | List Total | Pop Hits | Pop Total | Fold Enrichment | Bonferroni | Benjamini | FDR     |
|----------------|------------|-------|-------------|-------------|------------|----------|-----------|-----------------|------------|-----------|---------|
| UP_SEQ_FEATURE | repeat:2-1 | 4     | 1.123595506 | 0.015032772 | 326        | 29       | 18012     | 7.620901206     | 1          | 0.9742804 | 22.1696 |
| UP_SEQ_FEATURE | repeat:2-2 | 4     | 1.123595506 | 0.015032772 | 326        | 29       | 18012     | 7.620901206     | 1          | 0.9742804 | 22.1696 |
| UP_SEQ_FEATURE | repeat:1-2 | 4     | 1.123595506 | 0.016484325 | 326        | 30       | 18012     | 7.366871166     | 1          | 0.9680335 | 24.0460 |
| UP_SEQ_FEATURE | repeat:1-4 | 3     | 0.842696629 | 0.029188826 | 326        | 15       | 18012     | 11.05030675     | 1          | 0.9632690 | 38.7485 |
| UP_SEQ_FEATURE | repeat:1-3 | 3     | 0.842696629 | 0.041056074 | 326        | 18       | 18012     | 9.208588957     | 1          | 0.9776122 | 50.0278 |
| UP_SEQ_FEATURE | repeat:1-1 | 3     | 0.842696629 | 0.095847854 | 326        | 29       | 18012     | 5.715675904     | 1          | 0.9990481 | 81.1236 |

**Annotation Cluster 14**

**Enrichment Score: 1.5116632183915852**

| Category       | Term                                                  | Count | %           | PValue      | List Total | Pop Hits | Pop Total | Fold Enrichment | Bonferroni | Benjamini | FDR     |
|----------------|-------------------------------------------------------|-------|-------------|-------------|------------|----------|-----------|-----------------|------------|-----------|---------|
| UP_SEQ_FEATURE | domain:Actin-binding                                  | 4     | 1.123595506 | 0.001827702 | 326        | 14       | 18012     | 15.7861525      | 0.9295317  | 0.7345414 | 2.98174 |
| INTERPRO       | IPR001589:Actinin-type, actin-binding, conserved site | 4     | 1.123595506 | 0.005984098 | 337        | 23       | 20594     | 10.62778996     | 57         | 47        | 9335    |
| UP_SEQ_FEATURE | domain:CH 1                                           | 4     | 1.123595506 | 0.006083067 | 326        | 21       | 18012     | 10.52410167     | 0.9901037  | 0.3426900 | 8.75788 |
| UP_SEQ_FEATURE | domain:CH 2                                           | 4     | 1.123595506 | 0.006083067 | 326        | 21       | 18012     | 10.52410167     | 11         | 38        | 6912    |

**Table S2B: GO term analysis of genes expressed solely in myofibers**

|                  |                         |    |             |             |     |     |       |             |           |           |         |
|------------------|-------------------------|----|-------------|-------------|-----|-----|-------|-------------|-----------|-----------|---------|
| UP_KEYWORDS      | Actin-binding           | 10 | 2.808988764 | 0.016247827 | 349 | 252 | 22680 | 2.578796562 | 0.9793978 | 0.1109904 | 19.0241 |
|                  |                         |    |             |             |     |     |       |             | 76        | 54        | 8909    |
| UP_SEQ_FEATURE   | repeat:Spectrin 4       | 3  | 0.842696629 | 0.025597554 | 326 | 14  | 18012 | 11.83961437 |           | 0.9564268 | 34.8894 |
|                  |                         |    |             |             |     |     |       |             | 1         | 31        | 7628    |
| UP_SEQ_FEATURE   | repeat:Spectrin 3       | 3  | 0.842696629 | 0.036925865 | 326 | 17  | 18012 | 9.75027066  |           | 0.9736706 | 46.3445 |
|                  |                         |    |             |             |     |     |       |             | 1         | 86        | 6909    |
| UP_SEQ_FEATURE   | repeat:Spectrin 2       | 3  | 0.842696629 | 0.045350737 | 326 | 19  | 18012 | 8.72392638  |           | 0.9809103 | 53.6049 |
|                  |                         |    |             |             |     |     |       |             | 1         | 37        | 6596    |
| UP_SEQ_FEATURE   | repeat:Spectrin 1       | 3  | 0.842696629 | 0.045350737 | 326 | 19  | 18012 | 8.72392638  |           | 0.9809103 | 53.6049 |
|                  | IPR002017:Spectrin      |    |             |             |     |     |       |             | 1         | 37        | 6596    |
| INTERPRO         | repeat                  | 3  | 0.842696629 | 0.062239968 | 337 | 25  | 20594 | 7.333175074 |           | 0.9357761 | 62.5172 |
|                  |                         |    |             |             |     |     |       |             | 1         | 69        | 4631    |
| SMART            | SM00150:SPEC            | 3  | 0.842696629 | 0.07021763  | 158 | 29  | 10425 | 6.825621999 | 0.9999790 | 0.7854687 | 57.9953 |
|                  |                         |    |             |             |     |     |       |             | 86        | 83        | 602     |
| SMART            | SM00033:CH              | 4  | 1.123595506 | 0.077199462 | 158 | 66  | 10425 | 3.998849252 | 0.9999931 | 0.7331803 | 61.6029 |
|                  | IPR018159:Spectrin/alph |    |             |             |     |     |       |             | 46        | 58        | 8977    |
| INTERPRO         | a-actinin               | 3  | 0.842696629 | 0.080764954 | 337 | 29  | 20594 | 6.32170265  |           | 0.9542157 | 72.3616 |
|                  | GO:0003779~actin        |    |             |             |     |     |       |             | 1         | 66        | 6309    |
| GOTERM_MF_DIRECT | binding                 | 11 | 3.08988764  | 0.091629762 | 319 | 338 | 17446 | 1.779840849 |           | 0.6152449 | 74.8119 |
|                  | IPR001715:Calponin      |    |             |             |     |     |       |             | 1         | 79        | 2784    |
| INTERPRO         | homology domain         | 4  | 1.123595506 | 0.127572012 | 337 | 76  | 20594 | 3.216304857 |           | 0.9697516 | 87.5571 |
|                  | IPR011992:EF-hand-like  |    |             |             |     |     |       |             | 1         | 41        | 0044    |
| INTERPRO         | domain                  | 8  | 2.247191011 | 0.159809028 | 337 | 273 | 20594 | 1.790763144 |           | 0.9781989 | 92.9979 |
|                  |                         |    |             |             |     |     |       |             | 1         | 78        | 1022    |

**Annotation Cluster 15**

**Enrichment Score: 1.5095728180165189**

| Category | Term                                                                                              | Count | %           | PValue      | List Total | Pop Hits | Pop Total | Fold Enrichment | Bonferroni | Benjamini | FDR     |
|----------|---------------------------------------------------------------------------------------------------|-------|-------------|-------------|------------|----------|-----------|-----------------|------------|-----------|---------|
| BIOCARTA | m_pgc1aPathway:Regulation of PGC-1a                                                               | 4     | 1.123595506 | 0.013205511 | 38         | 18       | 1289      | 7.538011696     | 0.7208968  | 0.7208968 | 13.6199 |
|          |                                                                                                   |       |             |             |            |          |           |                 | 8          | 8         | 9353    |
| BIOCARTA | m_hdacPathway:Control of skeletal myogenesis by HDAC & calcium/calmodulin-dependent kinase (CaMK) | 4     | 1.123595506 | 0.043534713 | 38         | 28       | 1289      | 4.845864662     | 0.9860605  | 0.7593339 | 38.7520 |
|          |                                                                                                   |       |             |             |            |          |           |                 | 89         | 65        | 8137    |

**Table S2B: GO term analysis of genes expressed solely in myofibers**

|          |                                                                                     |   |             |             |    |    |      |             |  |           |           |         |
|----------|-------------------------------------------------------------------------------------|---|-------------|-------------|----|----|------|-------------|--|-----------|-----------|---------|
|          | m_nfatPathway:NFAT and Hypertrophy of the heart (Transcription in the broken heart) |   |             |             |    |    |      |             |  | 0.9937455 | 0.6375581 | 44.1324 |
| BIOCARTA |                                                                                     | 5 | 1.404494382 | 0.051486178 | 38 | 50 | 1289 | 3.392105263 |  | 12        | 43        | 4584    |

| Annotation Cluster 16 |                                           | Enrichment Score: 1.5036720844528069 |             |             |            |          |           |                 |            |           |         |      |
|-----------------------|-------------------------------------------|--------------------------------------|-------------|-------------|------------|----------|-----------|-----------------|------------|-----------|---------|------|
| Category              | Term                                      | Count                                | %           | PValue      | List Total | Pop Hits | Pop Total | Fold Enrichment | Bonferroni | Benjamini | FDR     |      |
| UP_KEYWORDS           | Glycolysis                                | 6                                    | 1.685393258 | 1.84E-04    | 349        | 35       | 22680     | 11.14040115     | 0.0426211  | 0.0021754 | 0.23646 |      |
| GOTERM_BP_DIRECT      | GO:0006096~glycolytic process             | 6                                    | 1.685393258 | 4.72E-04    | 332        | 36       | 18082     | 9.077309237     | 36         | 34        | 2286    |      |
| KEGG_PATHWAY          | mmu00010:Glycolysis / Gluconeogenesis     | 6                                    | 1.685393258 | 0.035503164 | 214        | 66       | 7691      | 3.267204758     | 0.5667940  | 0.0409644 | 0.79661 |      |
| KEGG_PATHWAY          | mmu01230:Biosynthesis of amino acids      | 5                                    | 1.404494382 | 0.158979778 | 214        | 76       | 7691      | 2.364424496     | 41         | 17        | 1063    |      |
| KEGG_PATHWAY          | mmu01200:Carbon metabolism                | 6                                    | 1.685393258 | 0.21850726  | 214        | 116      | 7691      | 1.858926845     | 0.9985067  | 0.3937851 | 35.9343 |      |
| KEGG_PATHWAY          | mmu01130:Biosynthesis of antibiotics      | 8                                    | 2.247191011 | 0.381541002 | 214        | 214      | 7691      | 1.343523452     | 06         | 61        | 1751    |      |
| GOTERM_BP_DIRECT      | GO:0005975~carbohydrate metabolic process | 4                                    | 1.123595506 | 0.730705352 | 332        | 206      | 18082     | 1.057550591     | 1          | 57        | 4729    |      |
|                       |                                           |                                      |             |             |            |          |           |                 |            | 0.8912762 | 95.2015 |      |
|                       |                                           |                                      |             |             |            |          |           |                 |            | 1         | 23      | 073  |
|                       |                                           |                                      |             |             |            |          |           |                 |            | 0.9544564 | 99.7311 |      |
|                       |                                           |                                      |             |             |            |          |           |                 |            | 1         | 07      | 7128 |
|                       |                                           |                                      |             |             |            |          |           |                 |            | 0.9999853 | 99.9999 |      |
|                       |                                           |                                      |             |             |            |          |           |                 |            | 1         | 28      | 9998 |
| Annotation Cluster 17 |                                           | Enrichment Score: 1.4409867721490395 |             |             |            |          |           |                 |            |           |         |      |
| Category              | Term                                      | Count                                | %           | PValue      | List Total | Pop Hits | Pop Total | Fold Enrichment | Bonferroni | Benjamini | FDR     |      |
| GOTERM_BP_DIRECT      | GO:0006914~autophagy                      | 8                                    | 2.247191011 | 0.01575401  | 332        | 142      | 18082     | 3.068386221     |            | 0.3794754 | 23.5991 |      |
| UP_KEYWORDS           | Autophagy                                 | 6                                    | 1.685393258 | 0.041296986 | 349        | 123      | 22680     | 3.170032846     | 1          | 6         | 8337    |      |
| GOTERM_CC_DIRECT      | GO:0000421~autophagosome membrane         | 3                                    | 0.842696629 | 0.073068504 | 339        | 26       | 19662     | 6.692307692     | 0.9999543  | 0.2260807 | 41.9157 |      |
|                       |                                           |                                      |             |             |            |          |           |                 |            | 83        | 65      | 0081 |
|                       |                                           |                                      |             |             |            |          |           |                 |            | 0.3952026 | 64.3831 |      |
|                       |                                           |                                      |             |             |            |          |           |                 |            | 1         | 98      | 4855 |
| Annotation Cluster 18 |                                           | Enrichment Score: 1.3782022776750231 |             |             |            |          |           |                 |            |           |         |      |

**Table S2B: GO term analysis of genes expressed solely in myofibers**

| Category                     | Term                                                                                                                     | Count | %           | PValue                                      | List Total | Pop Hits | Pop Total | Fold Enrichment | Bonferroni  | Benjamini   | FDR         |
|------------------------------|--------------------------------------------------------------------------------------------------------------------------|-------|-------------|---------------------------------------------|------------|----------|-----------|-----------------|-------------|-------------|-------------|
| GOTERM_CC_DIRECT             | GO:0005667~transcription factor complex                                                                                  | 12    | 3.370786517 | 0.006741959                                 | 339        | 267      | 19662     | 2.606741573     | 0.898378353 | 0.055559384 | 8.793190221 |
| GOTERM_MF_DIRECT             | GO:0044212~transcription regulatory region DNA binding                                                                   | 10    | 2.808988764 | 0.02737552                                  | 319        | 233      | 17446     | 2.347195501     | 0.999998653 | 0.344547913 | 32.8495535  |
| GOTERM_MF_DIRECT             | GO:0003700~transcription factor activity, sequence-specific DNA binding                                                  | 24    | 6.741573034 | 0.055027421                                 | 319        | 883      | 17446     | 1.486468544     | 1           | 0.506763487 | 55.60462999 |
| GOTERM_MF_DIRECT             | GO:0001077~transcriptional activator activity, RNA polymerase II core promoter proximal region sequence-specific binding | 10    | 2.808988764 | 0.059636119                                 | 319        | 270      | 17446     | 2.025542784     | 1           | 0.526981564 | 58.61194383 |
| GOTERM_MF_DIRECT             | GO:0043565~sequence-specific DNA binding                                                                                 | 18    | 5.056179775 | 0.072844249                                 | 319        | 633      | 17446     | 1.555156071     | 1           | 0.58396708  | 66.21394373 |
| GOTERM_MF_DIRECT             | GO:0000978~RNA polymerase II core promoter proximal region sequence-specific DNA binding                                 | 11    | 3.08988764  | 0.121942199                                 | 319        | 359      | 17446     | 1.675727596     | 1           | 0.697272458 | 84.52173953 |
| <b>Annotation Cluster 19</b> |                                                                                                                          |       |             | <b>Enrichment Score: 1.2397110249897572</b> |            |          |           |                 |             |             |             |
| Category                     | Term                                                                                                                     | Count | %           | PValue                                      | List Total | Pop Hits | Pop Total | Fold Enrichment | Bonferroni  | Benjamini   | FDR         |
| UP_KEYWORDS                  | Chaperone                                                                                                                | 9     | 2.528089888 | 0.009536021                                 | 349        | 191      | 22680     | 3.062152147     | 0.896778879 | 0.068505558 | 11.61167118 |
| GOTERM_MF_DIRECT             | GO:0051082~unfolded protein binding                                                                                      | 5     | 1.404494382 | 0.048071455                                 | 319        | 75       | 17446     | 3.645977011     | 1           | 0.46813936  | 50.67862797 |
| GOTERM_BP_DIRECT             | GO:0006457~protein folding                                                                                               | 4     | 1.123595506 | 0.416497567                                 | 332        | 128      | 18082     | 1.701995482     | 1           | 0.996248267 | 99.98918267 |
| <b>Annotation Cluster 20</b> |                                                                                                                          |       |             | <b>Enrichment Score: 1.1494022205001033</b> |            |          |           |                 |             |             |             |



**Table S2B: GO term analysis of genes expressed solely in myofibers**

| Category         | Term                                           | Count | %           | PValue      | List Total | Pop Hits | Pop Total | Fold Enrichment | Bonferroni      | Benjamini       | FDR             |
|------------------|------------------------------------------------|-------|-------------|-------------|------------|----------|-----------|-----------------|-----------------|-----------------|-----------------|
| GOTERM_CC_DIRECT | GO:0031463~Cul3-RING ubiquitin ligase complex  | 6     | 1.685393258 | 0.005893967 | 339        | 67       | 19662     | 5.194029851     | 0.8644012<br>33 | 0.0499419<br>39 | 7.72801<br>5962 |
| UP_SEQ_FEATURE   | repeat:Kelch 5                                 | 5     | 1.404494382 | 0.018321039 | 326        | 56       | 18012     | 4.933172656     | 1               | 84              | 1541            |
| UP_SEQ_FEATURE   | repeat:Kelch 4                                 | 5     | 1.404494382 | 0.02177554  | 326        | 59       | 18012     | 4.682333368     | 1               | 88              | 2773            |
| UP_KEYWORDS      | Kelch repeat                                   | 5     | 1.404494382 | 0.023688439 | 349        | 71       | 22680     | 4.57645587      | 0.9965923<br>23 | 0.1498436<br>34 | 26.5688<br>0272 |
| UP_SEQ_FEATURE   | repeat:Kelch 2                                 | 5     | 1.404494382 | 0.02428505  | 326        | 61       | 18012     | 4.528814241     | 1               | 09              | 4268            |
| UP_SEQ_FEATURE   | repeat:Kelch 3                                 | 5     | 1.404494382 | 0.02428505  | 326        | 61       | 18012     | 4.528814241     | 1               | 09              | 4268            |
| UP_SEQ_FEATURE   | repeat:Kelch 1                                 | 5     | 1.404494382 | 0.02428505  | 326        | 61       | 18012     | 4.528814241     | 1               | 09              | 4268            |
| INTERPRO         | IPR017096:Kelch-like protein, gigaxonin        | 4     | 1.123595506 | 0.029064741 | 337        | 41       | 20594     | 5.961930955     | 1               | 84              | 4619            |
| SMART            | SM00612:Kelch                                  | 4     | 1.123595506 | 0.052032429 | 158        | 56       | 10425     | 4.712929476     | 0.9996323<br>5  | 0.9283617<br>36 | 47.0922<br>5283 |
| UP_SEQ_FEATURE   | repeat:Kelch 6                                 | 4     | 1.123595506 | 0.055513251 | 326        | 48       | 18012     | 4.604294479     | 1               | 98              | 4088            |
| SMART            | SM00875:SM00875                                | 4     | 1.123595506 | 0.059093305 | 158        | 59       | 10425     | 4.473288994     | 0.9998784<br>12 | 0.8949919<br>29 | 51.6010<br>7832 |
| INTERPRO         | IPR011705:BTB/Kelch-associated                 | 4     | 1.123595506 | 0.071769655 | 337        | 59       | 20594     | 4.143036765     | 1               | 39              | 412             |
| INTERPRO         | IPR006652:Kelch repeat type 1                  | 4     | 1.123595506 | 0.08063637  | 337        | 62       | 20594     | 3.942567244     | 1               | 28              | 6739            |
| UP_SEQ_FEATURE   | domain:BACK                                    | 3     | 0.842696629 | 0.084801706 | 326        | 27       | 18012     | 6.139059305     | 1               | 42              | 873             |
| PIR_SUPERFAMILY  | PIRSF037037:kelch-like protein, gigaxonin type | 4     | 1.123595506 | 0.101947635 | 51         | 41       | 1807      | 3.456719273     | 0.9936147<br>48 | 0.9936147<br>48 | 63.9878<br>0715 |
| INTERPRO         | IPR015915:Kelch-type beta propeller            | 3     | 0.842696629 | 0.22015168  | 337        | 54       | 20594     | 3.39498846      | 1               | 03              | 2575            |
| SMART            | SM00225:BTB                                    | 6     | 1.685393258 | 0.231908247 | 158        | 218      | 10425     | 1.815991174     | 1               | 78              | 9454            |

**Table S2B: GO term analysis of genes expressed solely in myofibers**

|                  |                                                                             |   |             |             |     |     |       |             |   |           |    |      |         |
|------------------|-----------------------------------------------------------------------------|---|-------------|-------------|-----|-----|-------|-------------|---|-----------|----|------|---------|
| UP_SEQ_FEATURE   | domain:BTB                                                                  | 5 | 1.404494382 | 0.282431088 | 326 | 149 | 18012 | 1.854078314 | 1 | 0.9999999 | 38 | 5685 | 99.5879 |
| INTERPRO         | IPR000210:BTB/POZ-like                                                      | 6 | 1.685393258 | 0.295966846 | 337 | 222 | 20594 | 1.651616008 | 1 | 0.9990117 | 91 | 5078 | 99.5293 |
| INTERPRO         | IPR011333:BTB/POZ fold<br>GO:0004842~ubiquitin-protein transferase activity | 6 | 1.685393258 | 0.327747619 | 337 | 232 | 20594 | 1.580425663 | 1 | 0.9995165 | 97 | 321  | 99.7675 |
| GOTERM_MF_DIRECT | GO:0016567~protein ubiquitination                                           | 8 | 2.247191011 | 0.380992634 | 319 | 326 | 17446 | 1.342077428 | 1 | 0.9440753 | 54 | 295  | 99.8973 |
| GOTERM_BP_DIRECT | ubiquitination                                                              | 8 | 2.247191011 | 0.489544262 | 332 | 362 | 18082 | 1.203621114 | 1 | 0.9984109 | 65 | 7924 | 99.9988 |

**Annotation Cluster 21**

**Enrichment Score: 1.081681977243882**

| Category         | Term                                       | Count | %           | PValue      | List Total | Pop Hits | Pop Total | Fold Enrichment | Bonferroni  | Benjamini   | FDR         |
|------------------|--------------------------------------------|-------|-------------|-------------|------------|----------|-----------|-----------------|-------------|-------------|-------------|
| GOTERM_CC_DIRECT | GO:0033017~sarcoplasmic reticulum membrane | 4     | 1.123595506 | 0.018768443 | 339        | 33       | 19662     | 7.03030303      | 0.998345109 | 0.135449804 | 22.72403092 |
| UP_KEYWORDS      | Sarcoplasmic reticulum                     | 3     | 0.842696629 | 0.115176052 | 349        | 38       | 22680     | 5.130447896     | 1           | 0.44011149  | 79.32609256 |
| GOTERM_CC_DIRECT | GO:0016529~sarcoplasmic reticulum          | 3     | 0.842696629 | 0.263125926 | 339        | 58       | 19662     | 3               | 1           | 0.785696745 | 98.43045265 |

**Annotation Cluster 22**

**Enrichment Score: 1.0392648112335818**

| Category         | Term                                              | Count | %           | PValue      | List Total | Pop Hits | Pop Total | Fold Enrichment | Bonferroni  | Benjamini   | FDR         |
|------------------|---------------------------------------------------|-------|-------------|-------------|------------|----------|-----------|-----------------|-------------|-------------|-------------|
| GOTERM_BP_DIRECT | GO:0006413~translational initiation               | 5     | 1.404494382 | 0.017012304 | 332        | 54       | 18082     | 5.042949576     | 1           | 0.392696593 | 25.23810038 |
| UP_KEYWORDS      | Initiation factor                                 | 4     | 1.123595506 | 0.075330372 | 349        | 64       | 22680     | 4.061604585     | 0.999999991 | 0.344169786 | 63.53743468 |
| UP_KEYWORDS      | Protein biosynthesis                              | 6     | 1.685393258 | 0.076471245 | 349        | 147      | 22680     | 2.652476463     | 0.999999994 | 0.342283269 | 64.11273235 |
| GOTERM_MF_DIRECT | GO:0003743~translation initiation factor activity | 4     | 1.123595506 | 0.127275737 | 319        | 68       | 17446     | 3.21703854      | 1           | 0.707046574 | 85.81729702 |
| KEGG_PATHWAY     | mmu03013:RNA transport                            | 6     | 1.685393258 | 0.51015119  | 214        | 170      | 7691      | 1.2684442       | 1           | 0.979609428 | 99.98478246 |

\* Go term analysis of genes exclusively expressed in the single myofiber, defined as genes with a q value lower than 0.01 between single fiber and whole muscle, more highly expressed in the single fiber with a Log2 fold change of less than -1, more highly expressed than 10 RPM and with a difference in expression between single fiber and whole muscle of at least 10 RPM. Used DAVID 6.8 online functional annotation tool with the ENSEMBL\_GENE\_ID identifier and with a classification stringency of medium.

**Table S3: Alignment statistics of sequenced reads from young and old myofibers**

| Sample  | No Feature | Ambiguous | Unique   | % overall alignment rate | % unique alignment |
|---------|------------|-----------|----------|--------------------------|--------------------|
| 1M SF1  | 6783051    | 6805642   | 31809772 | 85.06                    | 70.07              |
| 1M SF2  | 7516309    | 8878533   | 35451356 | 85.50                    | 68.38              |
| 3M SF1  | 9839266    | 5780069   | 24273800 | 75.34                    | 60.85              |
| 3M SF2  | 8509055    | 13154637  | 31692716 | 84.05                    | 59.40              |
| 3M SF3  | 6307020    | 3744695   | 16002158 | 75.79                    | 61.42              |
| 19M SF1 | 14806391   | 15264491  | 48244515 | 81.09                    | 61.60              |
| 19M SF2 | 5255899    | 5987465   | 31378173 | 87.67                    | 73.62              |
| 19M SF3 | 7121590    | 11497612  | 28455416 | 84.87                    | 60.45              |
| WM 1    | 2188178    | 1917476   | 9300343  | 83.68                    | 69.37              |
| WM 2    | 6680813    | 4020883   | 22788368 | 80.05                    | 68.05              |
| WM 3    | 7793097    | 4584231   | 24389338 | 78.80                    | 66.34              |

\* Alignment statistics of reads sequenced from 1 month-old single myofibers (1M SF), 3 month-old single myofibers (3M SF), 19 month-old single myofibers (19M SF) and 3 month-old whole muscle (WM). No feature is defined as reads that did not map to the genome, ambiguous as reads that mapped to more than one region and unique reads are those that mapped to a single region of the genome.

Figure S1

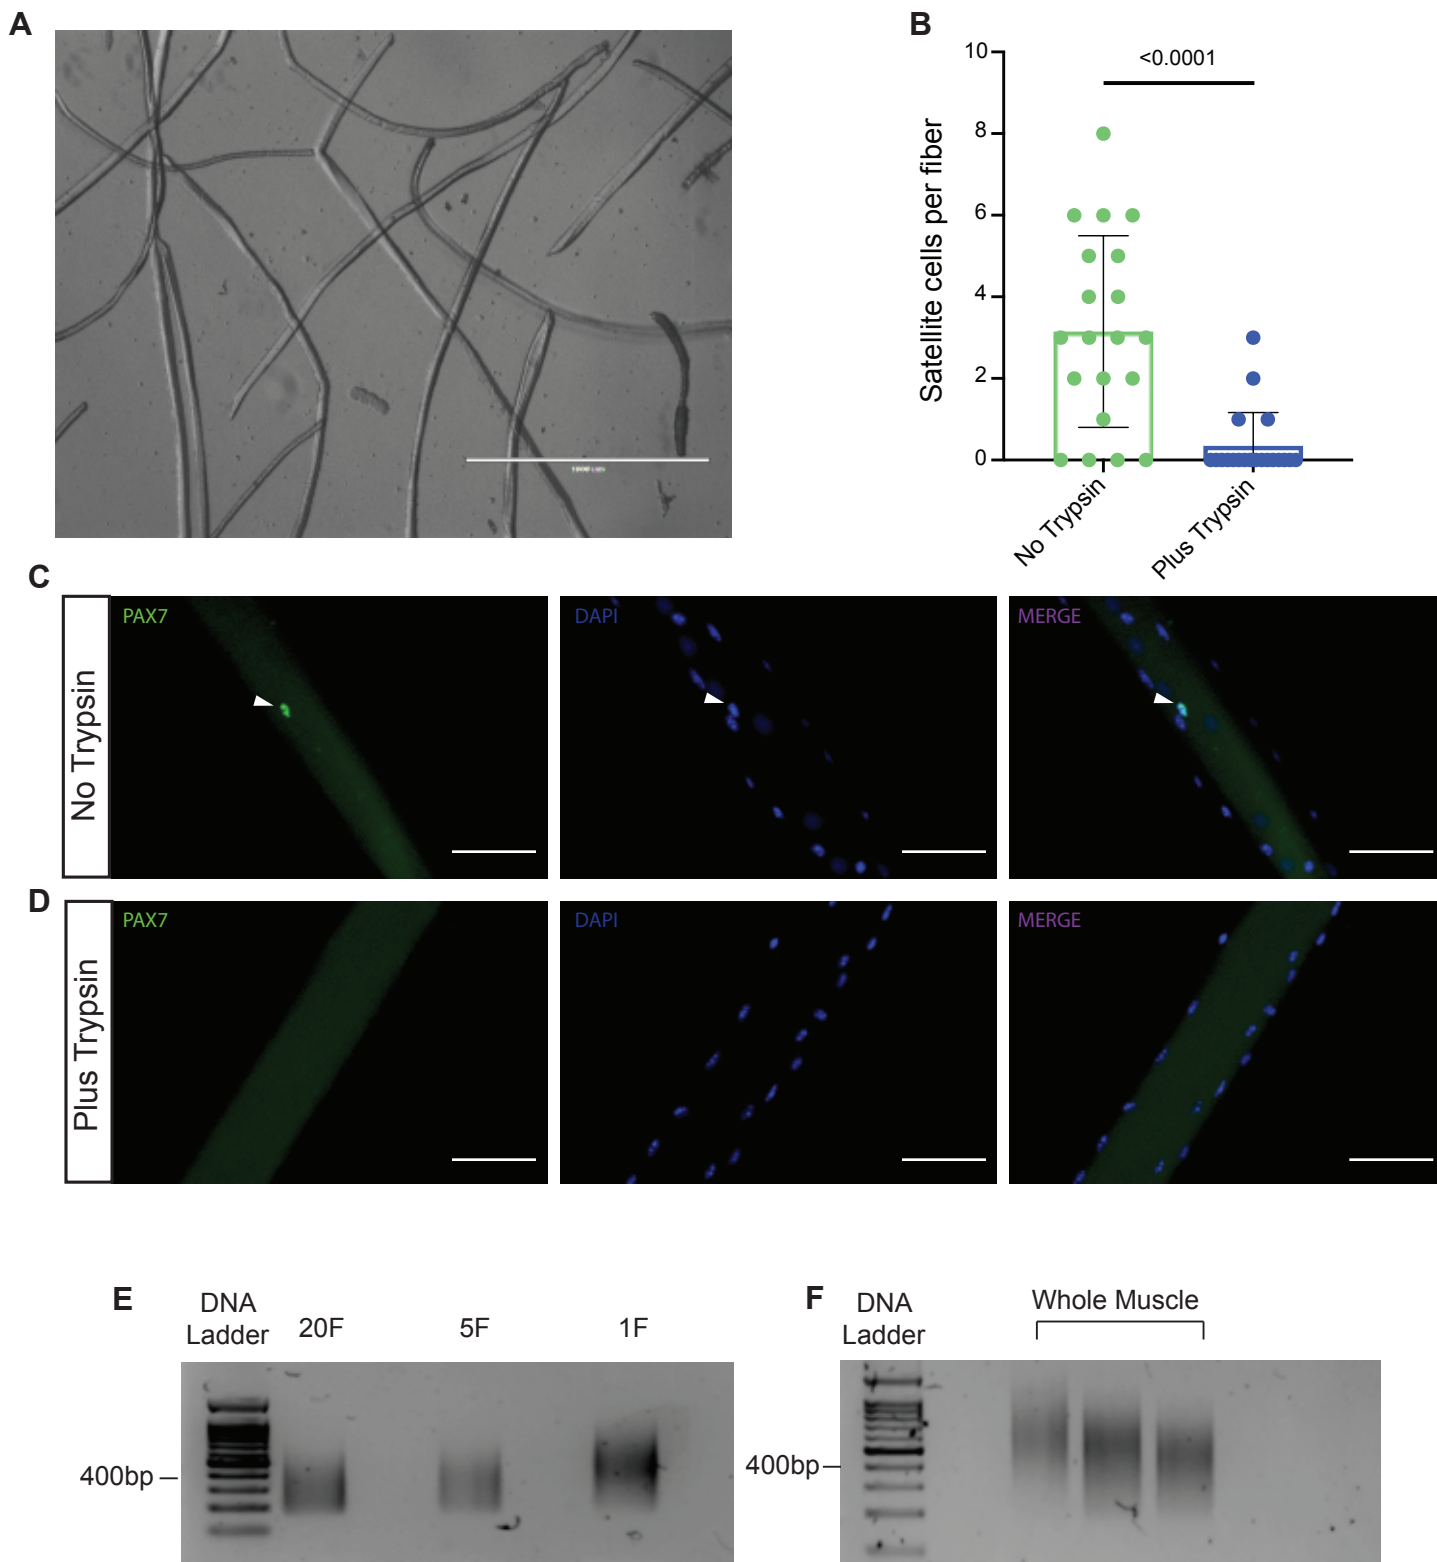

Figure S2

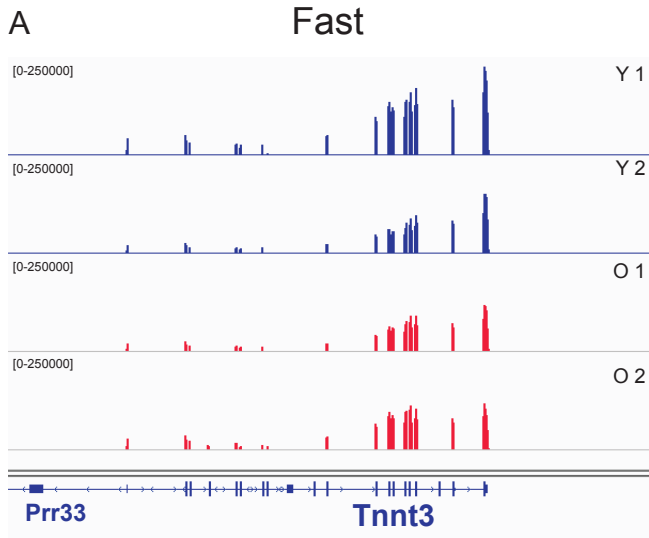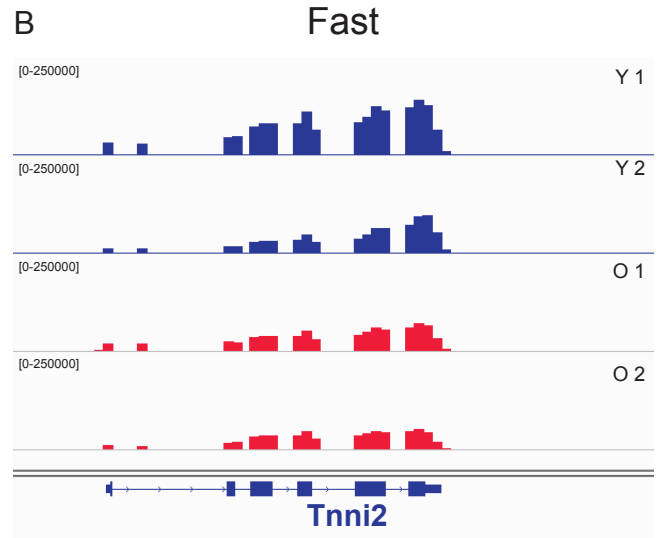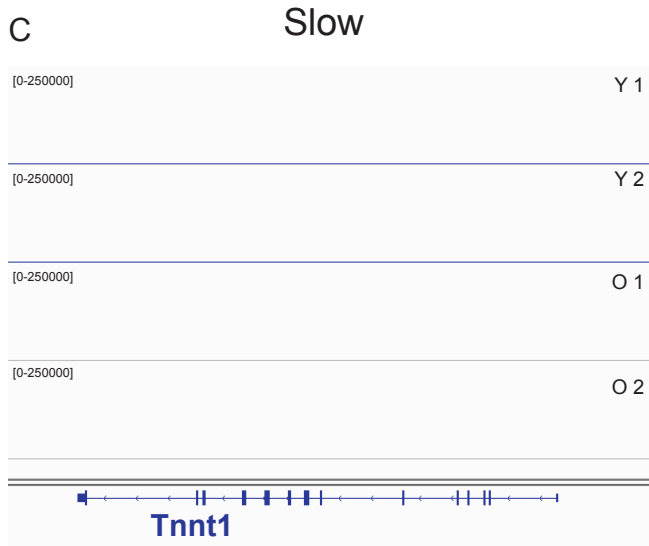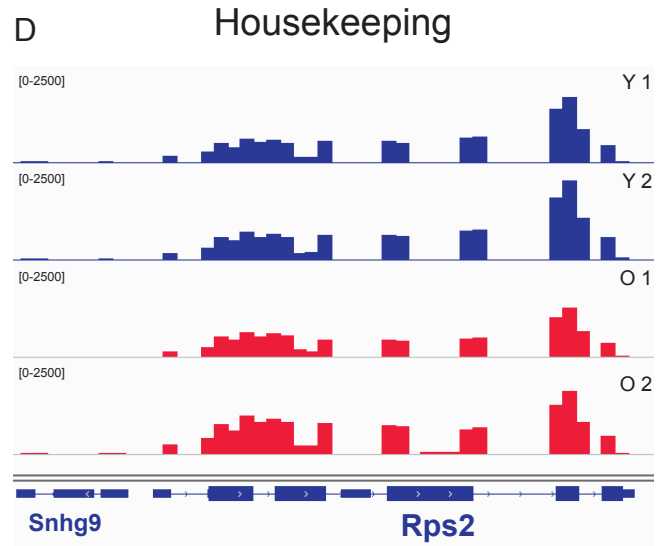

## References

1. Huang, D. W., Sherman, B. T., Tan, Q., Collins, J. R., Alvord, W. G., Roayaei, J., Stephens, R., Baseler, M. W., Lane, H. C., and Lempicki, R. A. (2007) The DAVID Gene Functional Classification Tool: a novel biological module-centric algorithm to functionally analyze large gene lists. *Genome Biol* **8**, R183
